# Supplementary material for: Cultural considerations for informed consent in paediatric research in low/middle-income countries: a scoping review
Source: PubMed Central journal article supplement — BMJ Paediatr Open. 2018 Dec 5;2(1):e000298. doi: 10.1136/bmjpo-2018-000298 (PMC6307601; doi:10.1136/bmjpo-2018-000298), 2018-12-05
Supplement: bmjpo-2018-000298.draft_revisions.pdf [file bmjpo-2018-000298.draft_revisions.pdf]

# BMJ Paediatrics Open

BMJ Paediatrics Open is committed to open peer review. As part of this commitment we make the peer review history of every article we publish publicly available.

When an article is published we post the peer reviewers' comments and the authors' responses online. We also post the versions of the paper that were used during peer review. These are the versions that the peer review comments apply to.

The versions of the paper that follow are the versions that were submitted during the peer review process. They are not the versions of record or the final published versions. They should not be cited or distributed as the published version of this manuscript.

BMJ Paediatrics Open is an open access journal and the full, final, typeset and author-corrected version of record of the manuscript is available on our site with no access controls, subscription charges or pay-per-view fees (<http://bmjpaedsopen.bmj.com>).

If you have any questions on BMJ Paediatrics Open's open peer review process please email [info.bmjpo@bmj.com](mailto:info.bmjpo@bmj.com)

**BMJ Paediatrics Open****Cultural considerations for informed consent in pediatric research in low and middle income countries: A scoping review**

|                               |                                               |
|-------------------------------|-----------------------------------------------|
| Journal:                      | <i>BMJ Paediatrics Open</i>                   |
| Manuscript ID                 | bmjpo-2018-000298                             |
| Article Type:                 | Original article                              |
| Date Submitted by the Author: | 02-Aug-2018                                   |
| Complete List of Authors:     | Colom, Marcela; Wuqu' Kawoq<br>Rohloff, Peter |
| Keywords:                     | Ethics, Health services research              |
|                               |                                               |

SCHOLARONE™  
Manuscripts

Review Only

1  
2  
3 1 **TITLE PAGE**  
4

5 2

6  
7 3 **Cultural considerations for informed consent in pediatric research in low and middle**  
8 **income countries: A scoping review**  
9  
10 4

11 5

12  
13  
14 6 Marcela Colom MD<sup>1</sup>, Peter Rohloff MD PhD<sup>1,2,3</sup>  
15  
16

17 7

18  
19 8 <sup>1</sup>Wuqu' Kawoq | Maya Health Alliance, 2da Avenida 3-48 Zona 3, Barrio Patacabaj,  
20  
21 9 Tecpán, Chimaltenango, Guatemala  
22  
23

24 10

25  
26 11 <sup>2</sup>Division of Global Health Equity, Brigham and Women's Hospital, Boston, MA, USA  
27  
28 12

29 12

30  
31 13 <sup>3</sup> Corresponding Author. Peter Rohloff, Brigham and Women's Hospital, 75 Francis Street,  
32  
33 14 Boston, MA, 02115. Phone: 617-278-0055. Fax: 888-372-2354. Email:  
34  
35 15 prohloff@bwh.harvard.edu  
36  
37 16

38 16

39  
40 17

41  
42 18

43  
44 19 Word count: 3010  
45  
46 20

47 20

48  
49 21

50  
51 22

52  
53 23  
54  
55  
56  
57  
58  
59  
60

1  
2  
3 24 **ABSTRACT**  
4  
5  
6 25

7  
8 26 Introduction: Conducting research with children in low- and middle-income countries  
9  
10 27 (LMICs) requires consideration of socioeconomic inequalities and cultural and linguistic  
11  
12 28 differences. Our objective was to survey the literature on informed consent in pediatric  
13  
14 29 LMIC research, assessing for practical guidance for culturally- and linguistically-  
15  
16 30 appropriate procedures.  
17  
18

19 31  
20  
21 32 Methods: We conducted a scoping review on informed consent in pediatric LMIC research  
22  
23 33 searching the Pubmed, Web of Science and PsycINFO databases. Eligible articles were  
24  
25 34 published in English, from any date range, of any study design or format.  
26  
27  
28 35

29  
30 36 Results: The search identified 2,027 references, of which 50 were included in the analysis  
31  
32 37 following full-text review. Reviewed guidelines emphasized individual, informed and  
33  
34 38 voluntary consent from parents and caregivers. Reviewed articles provided detailed  
35  
36 39 practical guidance on adapting these guiding principles to LMIC settings, including  
37  
38 40 considerations for community engagement, verbal or other alternative consent procedures  
39  
40 41 for low-literacy settings or less-commonly spoken languages, and guarding against  
41  
42 42 therapeutic misconception by caregivers. There was uncertainty, however, on how to best  
43  
44 43 protect individual autonomy, especially when influenced by gender dynamics, leadership  
45  
46 44 hierarchies, or the social status of researchers themselves. There was, furthermore, limited  
47  
48 45 research discussing the special case of research involving adolescents or of procedures for  
49  
50 46 documenting assent by participating children.  
51  
52  
53  
54  
55  
56 47

1  
2  
3  
4  
5  
6  
7  
8  
9  
10  
11  
12  
13  
14  
15  
16  
17  
18  
19  
20  
21  
22  
23  
24  
25  
26  
27  
28  
29  
30  
31  
32  
33  
34  
35  
36  
37  
38  
39  
40  
41  
42  
43  
44  
45  
46  
47  
48  
49  
50  
51  
52  
53  
54  
55  
56  
57  
58  
59  
60

48 Conclusions: A scoping review of pediatric research in LMICs revealed substantial  
49 guidance on several features of culturally appropriate informed consent . However,  
50 additional research and guidance is needed, especially in the areas of gender imbalances,  
51 research with adolescents, and children’s own assent to participate in research.

Confidential: For Review Only

## 54 INTRODUCTION

55

56 Prior to World War II, there was little international consensus on the ethical conduct of  
57 human subjects' research. The Nuremberg code, developed in 1947 during the Nuremberg  
58 war crimes trials, was one of the first attempts to articulate basic ethical principles, such as  
59 the right to informed consent.(1) Subsequently, the World Medical Association's (WMA)  
60 Declaration of Helsinki in 1964 provided a more definitive consensus statement on the core  
61 principles of ethical conduct of research--beneficence, self-determination, and informed  
62 consent--which is widely considered the foundational international document in modern  
63 research ethics.(2) Practical guidance on ethical practice is well codified in the joint  
64 statements produced by the Council for International Organizations of Medical Sciences  
65 (CIOMS) and the World Health Organization (WHO).(3)

66

67 Extension of ethical research principles to include considerations appropriate for research  
68 in pediatric populations are also important, including guidance on obtaining informed  
69 consent from parents or guardians, obtaining assent from children themselves, and  
70 weighing the balance of risks and benefits of proposed research.(3,4) Improvements in the  
71 conduct and volume of pediatric clinical trials, which have historically been few in number  
72 and of lower quality than corresponding trials in adult subjects, have also recently been  
73 advocated.(5)

74

75 However, there still remains uncertainty around how best to implement international ethical  
76 principles of pediatric research in some settings. This is especially the case in low and  
77 middle-income countries (LMICs), and in research with as indigenous populations,

1  
2  
3 78 speakers of less-common languages, or populations with high levels of illiteracy.  
4  
5 79 Practically, we experienced this recently while designing a clinical trial of a nutrition  
6  
7 80 intervention for indigenous Maya children in rural Guatemala, and our experience  
8  
9  
10 81 navigating consent, literacy, and translingual adaptation in this population prompted our  
11  
12 82 interest in more formally exploring the topic.(6) To this end, here we conduct a scoping  
13  
14 83 review of the existing literature on cultural and contextual considerations for informed  
15  
16 84 consent in the conduct of pediatric research in LMICs. Through this review, we identify  
17  
18 85 evidence for specific culturally- and contextually-sensitive practices, as well as areas where  
19  
20 86 additional research and guideline development is needed.  
21  
22  
23  
24 87

## 26 88 **METHODS**

### 30 90 **Search and inclusion strategy**

31  
32  
33 91  
34  
35 92 To identify articles, we searched the PubMed, Web of Science and PsycINFO databases.  
36  
37 93 We conducted searches using a combination of the following key terms: “pediatric” or  
38  
39 94 “children” or “adolescents”; “research” or “biomedical research”; “consent” or “informed  
40  
41 95 consent” or “ethics”; “developing countries” or “low income countries” or “middle income  
42  
43 96 countries”; “illiteracy”; “culturally competent”. We used no date limits and included all  
44  
45 97 articles published through May 2018. In addition, we visited the websites of international  
46  
47 98 health policy organizations to identify ethics guidelines for the conduct of research in low-  
48  
49 99 and middle-income countries. We also manually reviewed the reference lists of articles  
50  
51 100 identified using the above methods. For this scoping review, of the articles identified above  
52  
53 101 we included for analysis any type of study design or format (original research, commentary,  
54  
55  
56  
57  
58  
59  
60

1  
2  
3 102 case study, review, expert opinion), which addressed the informed consent process  
4  
5 103 specifically for pediatric or adolescent populations in low or middle-income  
6  
7 104 countries. Articles not in English were excluded.  
8  
9

10  
11 105

## 12 106 **Data extraction and synthesis**

13  
14  
15 107

16  
17 108 We exported identified articles into an Excel spreadsheet template which recorded location  
18  
19 109 of study, study type and design, study context, aspects of informed consent examined, and  
20  
21 110 key findings. Both authors reviewed the study titles and abstracts. After removal of articles  
22  
23 111 which were deemed not eligible for inclusion, one author (MC) performed a full text review  
24  
25 112 of all the remaining articles. As a scoping review to assess the patterns of existing  
26  
27 113 literature on informed consent in LMIC pediatric research, assessments of individual study  
28  
29 114 bias and quality were not performed. Data extracted from articles was collated in summary  
30  
31 115 form (Table 1), and major qualitative findings are presented in the following narrative  
32  
33 116 synthesis.  
34  
35  
36  
37  
38 117

## 39 118 **RESULTS**

40  
41  
42 119

### 43 120 **Results of literature screen**

44  
45  
46  
47 121

48  
49 122 A total of 2,027 candidate titles were identified through database searches, supplemented  
50  
51 123 by reference list and website reviews. Of these, 1,721 did not meet eligibility criteria, and  
52  
53 124 306 were included for abstract review. If the abstract was not available but full text was, the  
54  
55 125 title was included for full text review. After abstract review, 50 duplicates were found, one  
56  
57  
58  
59  
60



1  
2  
3 126 was not in English, 7 were not available (abstract nor full text), and 170 abstracts did not  
4  
5 127 meet inclusion criteria. 78 articles were selected for full text review, of which 24  
6  
7 128 subsequently did not meet inclusion criteria, one was in French, one was a duplicate, and  
8  
9  
10 129 two did not have available full text. Therefore 50 full-text articles were included in this  
11  
12 130 review (Figure 1, Tables 1-2).  
13  
14  
15 131

### 17 132 **Summary of guidelines and commentaries**

19 133  
20  
21 134 We selected for review five guidelines that address issues of informed consent in  
22  
23 135 international settings and in research involving children and summarize key  
24  
25 136 recommendations in Table 1. All guidelines emphasize the importance of obtaining  
26  
27 137 individual, informed and voluntary consent for research.(3,4,7–9) Several guidelines  
28  
29 138 suggest modifications appropriate for lower-resource settings, such as obtaining witnessed  
30  
31 139 verbal consent when literacy is a barrier. (7,9) The United States National Bioethics  
32  
33 140 Advisory Commission (NBAC), for example, even acknowledges that oral consent might  
34  
35 141 even be preferable in some circumstances.(8) However, as several commentaries on the  
36  
37 142 guidelines note, there is little specificity on how best operationalize these core principles,  
38  
39 143 such as how to formally document verbal consent.(10,11)  
40  
41  
42  
43  
44  
45 144

46  
47  
48 145 Another important consideration of LMIC research addressed in guidelines is an emphasis  
49  
50 146 on the need to at times obtain consent from community stakeholders and leaders, or other  
51  
52 147 key local decision makers. Nevertheless, all guidelines unanimously assert that community-  
53  
54 148 based consent can never replace individual consent. When local cultural practices around  
55  
56  
57  
58  
59  
60

1  
2  
3 149 community-based consent contradict core principles of the international consensus on the  
4  
5 150 informed consent process, such as the need for voluntary individual consent, researchers are  
6  
7 151 advised to search for culturally sensitive ways of providing all information to potential  
8  
9 152 participants without compromising the substantive ethical standard of informed consent, an  
10  
11 153 adaptive process in which local research ethics committees are expected to place a  
12  
13 154 substantial role. (8,10–12)  
14  
15  
16  
17  
18  
19

155

20 156 Finally, with respect to children or adolescents not capable of providing informed consent,  
21  
22 157 in addition to obtaining consent from parents or legal representatives, most guidelines also  
23  
24 158 reinforce the need to obtain assent from the child or adolescent in an age-appropriate way.  
25  
26 159 (3,4,7,9) The CIOMS guidelines on research involving children and adolescents states that  
27  
28 160 as adolescents reach the age of maturity, their agreement to participate may be ethically  
29  
30 161 considered as informed consent. However, if they legally remain minors, researchers are  
31  
32 162 cautioned that consent from a parent is still generally needed, but a list is provided of  
33  
34 163 possible situations when parental consent might be waived, such as with legally  
35  
36 164 emancipated adolescents, or under circumstances where obtaining parental consent is not  
37  
38 165 desirable because of the research topic. (3)  
39  
40  
41  
42  
43

44 166

45 167

46 168

47 169

48 170

49 171

50 172

51

52

53

54

1  
2  
3  
4  
5  
6  
7  
8  
9  
10  
11  
12  
13  
14  
15  
16  
17  
18  
19  
20  
21  
22  
23  
24  
25  
26  
27  
28  
29  
30  
31  
32  
33  
34  
35  
36  
37  
38  
39  
40  
41  
42  
43  
44  
45  
46  
47  
48  
49  
50  
51  
52  
53  
54  
55  
56  
57  
58  
59  
60

173

Confidential: For Review Only

174 **Table 1 Summary of selected major guidelines, reports and reviews on ethical**  
 175 **conduction of research in children**

| Guideline                                                      | Core principles                                                                                                                                                                                                                                                                                                                                         | Considerations for adapting to low-resource, low-literary, and minority language settings                                                                                                                                                                                                                                                             |
|----------------------------------------------------------------|---------------------------------------------------------------------------------------------------------------------------------------------------------------------------------------------------------------------------------------------------------------------------------------------------------------------------------------------------------|-------------------------------------------------------------------------------------------------------------------------------------------------------------------------------------------------------------------------------------------------------------------------------------------------------------------------------------------------------|
| World Medical Association, Declaration of Helsinki(7)          | <ul style="list-style-type: none"> <li>• If a research subject is not capable of giving informed consent, it should be sought from a legally authorized representative</li> <li>• When the subject can give assent to decisions about participation in research, assent should be sought in addition to consent. Dissent should be respected</li> </ul> | <ul style="list-style-type: none"> <li>• Special attention should be given to the specific information needs of individual potential subjects as well as to the methods used to deliver the information</li> <li>• Consent should be given preferably in writing, if not the non-written consent must be formally documented and witnessed</li> </ul> |
| Council for International Organizations of Medical Sciences(3) | <ul style="list-style-type: none"> <li>• Obtain permission from a parent or a legally authorized representative of the child</li> <li>• Obtain assent from the child or adolescent according to his or her capacity and after having been provided with information tailored to the child's or adolescent's level of maturity</li> </ul>                | <ul style="list-style-type: none"> <li>• Consult with and engage communities in the informed consent process</li> <li>• Obtained a signed form as evidence of informed consent, justify any exceptions to this general rule and seek approval of the research ethics committee</li> </ul>                                                             |
| Standards for Research (StaR) in Child Health(4)               | <ul style="list-style-type: none"> <li>• Obtain consent and assent when age-appropriate</li> <li>• Provide age-appropriate, clear, concise, and on-going information for parents and children</li> </ul>                                                                                                                                                | <ul style="list-style-type: none"> <li>• Provide clear justification to involve a particular population and equitable sharing of benefits and risks</li> <li>• Community consultation can be helpful but does not replace the need for individual consent</li> <li>• Strengthen composition and expertise of local ethics committees</li> </ul>       |
| National Bioethics Advisory Commission, Ethical and policy     |                                                                                                                                                                                                                                                                                                                                                         | <ul style="list-style-type: none"> <li>• Develop culturally appropriate ways to disclose information that is necessary for adherence to the ethical</li> </ul>                                                                                                                                                                                        |

|                                                               |                                                                                                                                                                                                                                                                                                                                                                          |                                                                                                                                                                                                                                                                                                                                                                                                                                                                                                                                     |
|---------------------------------------------------------------|--------------------------------------------------------------------------------------------------------------------------------------------------------------------------------------------------------------------------------------------------------------------------------------------------------------------------------------------------------------------------|-------------------------------------------------------------------------------------------------------------------------------------------------------------------------------------------------------------------------------------------------------------------------------------------------------------------------------------------------------------------------------------------------------------------------------------------------------------------------------------------------------------------------------------|
| <p>issues in international research(8)</p>                    |                                                                                                                                                                                                                                                                                                                                                                          | <p>standard of informed consent</p> <ul style="list-style-type: none"> <li>• Develop procedures to ensure that participants understand the information provided in the consent process</li> <li>• Respect local requirements of asking permission from community representatives for approaching potential participants, but respect the requirement of individual informed consent</li> <li>• Ethics review committees can waive the requirements of written and signed consent in accordance with local cultural norms</li> </ul> |
| <p>European Council and European Parliament Guidelines(9)</p> | <ul style="list-style-type: none"> <li>• Consent should be sought from parents or legal representatives</li> <li>• Information should be provided to the minor according to its capacity of understanding</li> <li>• The explicit wish of a minor who is capable of forming an opinion and assessing information to refuse participation should be considered</li> </ul> | <ul style="list-style-type: none"> <li>• The individual or legal representative has to give written consent. If the individual is unable to write, oral consent may be given in the presence of at least one witness, as provided for in national legislation</li> </ul>                                                                                                                                                                                                                                                            |

1  
2  
3 176  
4  
56 177 **Thematic summary of research on consent in LMIC pediatric research**  
7  
89 178  
10  
11

12 179 Existing published work on informed consent in pediatric research in LMICs consists  
13  
14 180 largely of case studies describing the experience of individual research teams and  
15  
16 181 discussing the challenges and solutions utilized when adapting consent processes to their  
17  
18 182 local context. We summarize several major themes emerging from these studies here and  
19  
20  
21 183 detail key findings from the reviewed articles in Table 2.  
22  
23

24 184  
25  
2627 185 Understanding social norms around decision making and protecting individual autonomy  
28  
29

30 186 An important principle highlighted in international guidelines on informed consent  
31  
32 187 in LMICs is appropriate and early engagement with existing local leadership structures  
33  
34 188 (such as a council of elders) balanced against respect for the autonomy of individual  
35  
36 189 children or their caregivers.(3,8) In practice, this can be a delicate balance to maintain.  
37  
38  
39 190 Kongsholm and colleagues, for example, describe consent processes in rural Pakistan,  
40  
41 191 where family structures are patriarchal and hierarchical. In this setting, consent procedures  
42  
43 192 involved first seeking consent from an elder, who provided initial consent for the entire  
44  
45 193 family. However, under this approach, the voluntariness of individual participants may be  
46  
47 194 undermined, and it is unclear how best to ensure that individuals still retain an “opt out”  
48  
49 195 mechanism.(13)  
50  
51

52  
53 196  
54  
55  
56  
57  
58  
59  
60

1  
2  
3 197 Another important consideration explored by several studies is understanding how not all  
4  
5 198 potential consenting caregivers may feel empowered to decline participating in research.  
6  
7 199 Consent procedures administered by local research personnel or by individuals with high  
8  
9  
10 200 social status, such as physicians, may inspire trust.(13,14) However it may also make them  
11  
12 201 reluctant to decline participation, or to resist active participation. For example, in one study  
13  
14 202 in Kenya, explicit refusals to participate were often considered to be impolite. Here  
15  
16 203 researchers found that caregivers expressed their unwillingness to participate by delaying  
17  
18 204 the consent process, or by participating inconsistently in research procedures even after  
19  
20 205 initially having consented to the study.(15)  
21  
22  
23  
24  
25  
26

#### 27 207 Adapting consent procedures to low-literate settings

28  
29  
30 208 There is strong consensus in international ethics guidelines that written, informed  
31  
32 209 consent is preferred when conducting research. In the case of pediatric research, this again  
33  
34 210 typically involves obtaining written consent from one or both primary caregivers.(4,9,16)  
35  
36 211 However, in many LMIC settings, literacy may be low or a high value may be placed on  
37  
38 212 oral interactions, and lack of alternative consent procedures may violate another core ethics  
39  
40 213 principle, namely the equitable distribution of research benefits and burdens across  
41  
42 214 populations.(3,14,17) Several of the studies we reviewed described these procedures, with  
43  
44 215 verbal consent commonly being obtained, most often in the presence of a literate witness  
45  
46 216 who is able to read available consent documents. (13,14,17,18) In one very thoughtful  
47  
48 217 piece, Kalabuanga and colleagues note, however, that ad hoc witnesses may often impose  
49  
50 218 their views on the consenting caregiver and their child, rather than encourage dialog and act  
51  
52 219 as a safeguard.(18) The authors suggest that these challenges by be mitigated by careful  
53  
54  
55  
56  
57  
58  
59  
60

1  
2  
3 220 vetting and training of independent witnesses or, alternatively, but allowing potential  
4  
5 221 consenting caregivers to use a trusted relative or friend as their witness.(18)  
6  
7

8  
9 222

10  
11 223 Working in indigenous or less-commonly-spoken languages  
12  
13

14 224 International ethics guidelines emphasize that research information should be  
15  
16 225 provided to consenting caregivers in a local language understandable to the  
17  
18 226 individual.(7,8,16) However, this is most commonly understood to be a working lingua  
19  
20 227 franca, and the issue of and practical approach to provisioning consent processes in an  
21  
22 228 indigenous language is largely unaddressed in LMICs.(19) This is an important  
23  
24 229 consideration, given that a substantial proportion of the potential pediatric research  
25  
26 230 population in LMICs are from populations that speak indigenous or less-commonly-spoken  
27  
28 231 languages.(20) In an interesting review of lessons learned in a pediatric vaccine trial in  
29  
30 232 West Africa, Martellet and colleagues noted difficulties in preparing consent procedures in  
31  
32 233 some of the less-common language groups included in the trial, where use of the written  
33  
34 234 form was uncommon. They describe alternative procedures, such as the preparation of  
35  
36 235 recordings of consent scripts in local languages and extensive practice sessions with  
37  
38 236 research staff obtaining consent in local languages.(17) Similarly, another vaccine trial in  
39  
40 237 The Gambia described the successful use of audio-visual Speaking Books in local less-  
41  
42 238 common languages to consent caregivers. (21)  
43  
44  
45  
46  
47  
48

49 239

50  
51  
52 240 Gender dynamics in caregiver consent  
53  
54  
55  
56  
57  
58  
59  
60



1  
2  
3 241 Local gender dynamics and decision making procedures when consenting male and  
4  
5 242 female caregivers for research is an important consideration. For example, a female  
6  
7 243 caregiver may be inclined to allow her child to participate, but be unable to do so if her  
8  
9 244 husband or another male authority figure refuses.(13) The opposite may also occur, if a  
10  
11 245 research study is consented by a male figure, but requires significant participatory effort  
12  
13 246 from the primary female for study-related activities, leading the woman to express their  
14  
15 247 refusal through procedural delay or inconsistent participation.(15) Given concerns about  
16  
17 248 gender power imbalance and potential repercussions for consenting female caregivers,  
18  
19 249 some studies discussed working to routinely involve fathers or male authority figures in the  
20  
21 250 consent process for more complex or higher-risk research interventions.(15,22) In one  
22  
23 251 interesting study based in India, Rajaraman and colleagues found that caregivers were  
24  
25 252 more likely to actively participate in the consent process when both were present. They also  
26  
27 253 observed, however, that this factor may have been do the fact that most study staff  
28  
29 254 obtaining consent were male, and they call for more research on how the gender of research  
30  
31 255 staff impacts the consent process.(23)

32  
33  
34  
35  
36  
37  
38 256

39  
40  
41 257 Disclosing potential benefits and risks of participation in research

42  
43  
44 258 Participation in some research studies, particularly those with a controlled design,  
45  
46 259 may not result in direct benefit to participants. Several studies report difficulties explaining  
47  
48 260 to caregivers that medical research procedures may not result in direct benefit to their  
49  
50 261 children. Indeed, therapeutic misconception might be hard to avoid in certain contexts, as it  
51  
52 262 might be affected by factors like educational level and cultural and religious beliefs about  
53  
54  
55  
56  
57  
58  
59  
60

1  
2  
3 263 disease.(13,18) However, explicit attention to this dynamic while designing consent  
4  
5 264 procedures may help to ensure caregiver comprehension.(24)  
6  
7

8 265  
9

10  
11 266 At the same time, care must be given to a culturally-appropriate degree of information  
12  
13 267 disclosure. For example, in several studies, caregivers—especially those of higher  
14  
15 268 socioeconomic or educational status—were more likely to participate when provided with  
16  
17 269 detailed and in-depth information about the study processes and given opportunities to ask  
18  
19 270 questions.(12,22,23,25) At the same time, other case studies point out how over-detailed  
20  
21 271 discussion of study procedures or scientific rationale may provoke unneeded reserve or  
22  
23 272 suspicion where such detailed disclosures by health professionals are not culturally  
24  
25 273 customary.(13)  
26  
27  
28  
29

30 274  
31  
32

33 275 Finally, in settings where access to healthcare and other important social goods may be  
34  
35 276 limited, even basic diagnostic or ancillary procedures that occur as part of a research study  
36  
37 277 may be better than the local standard of care, leading to an undue inducement for caregivers  
38  
39 278 to enroll their children in research, even after being informed about the experimental nature  
40  
41 279 or studies and the risk-benefit balance.(11,13,18) These considerations highlight the  
42  
43 280 importance of considering the socio-economic and cultural background of study settings  
44  
45 281 well before beginning research and making plans to incorporate appropriate early, equitable  
46  
47 282 benefit-sharing measures when possible.(18)  
48  
49  
50

51 283  
52  
53

54  
55 284 Adolescents  
56  
57  
58  
59  
60

285

Adolescents constitute a special population with vulnerabilities different from those of adults and younger children, and they should be included in research that addresses their specific needs. However, as legal minors they often cannot give informed consent for research.(16) In research in LMICs, regulations vary significantly from country to country regarding when adolescents can provide legal consent for research.(26) For example, even when legal frameworks allow adolescents to seek, for example, contraception services without parental permission, they cannot necessarily provide consent for research on that theme.(27,28) In a scoping review of post abortion care research, Zulu and coauthors discuss how the need to balance adolescents' privacy needs and the demand for parental consent poses difficulties for researchers in this field.(29) Woollett and colleagues describe an interesting case study where they sought consent from a High Court in South Africa for research involving orphaned HIV-positive adolescents. In that study, they provide detailed recommendations for consent involving adolescents, including training staff about confidentiality requirements; recognizing immature decision-making by adolescents and developing appropriate methods for probing comprehension and consent; and utilizing methods that promote active participation in research, such as mobile phones.(28)

302

303 Assent

Pediatric research guidelines are unanimous on the need to obtain age-appropriate assent from children and adolescents who do not provide their own informed consent (Table 1). However, we found very little explicit discussion or description of procedures for

1  
2  
3 307 obtaining assent in the research reports we reviewed. However, one interesting qualitative  
4  
5 308 study on parental perceptions of assent in Jordan revealed considerable variability in  
6  
7 309 caregivers' perspectives about at what age assent should be solicited or, even, if assent  
8  
9 310 should in all cases be obtained and dissent respected.(22)  
10  
11  
12

13 311

14  
15 312 **Table 2. Summary of articles selected for inclusion in review. [Insert Table 2 here]**  
16

17 313  
18  
19  
20  
21  
22  
23  
24  
25  
26  
27  
28  
29  
30  
31  
32  
33  
34  
35  
36  
37  
38  
39  
40  
41  
42  
43  
44  
45  
46  
47  
48  
49  
50  
51  
52  
53  
54  
55  
56  
57  
58  
59  
60

| Reference (Year)                   | Study Description                                                                                          | Study Location | Major findings                                                                                                                                                                                                                                                                                                                                                                                                                                                            |
|------------------------------------|------------------------------------------------------------------------------------------------------------|----------------|---------------------------------------------------------------------------------------------------------------------------------------------------------------------------------------------------------------------------------------------------------------------------------------------------------------------------------------------------------------------------------------------------------------------------------------------------------------------------|
| Kongsholm N et al.(13) (2018)      | Qualitative research– interviews with researchers and donors about consent experience for genetic research | Pakistan       | Researchers report adaptations to consent process including use of elder and oral consent; involving literate witnesses to validate written forms; and disclosure of information adapted to educational level. Challenges include no knowledge about consent process by participants and therapeutic misconception. Donors' motivations for participating include obtaining direct benefit from their participation and a high level of trust in the research team.       |
| Ott MA et al.(30) (2018)           | Review – participation of children of minor parents in research                                            | n/a            | Discussion on international research documents and existing laws and practices regarding consent for research for children of minor parents. Few countries have regulations about the subject, which might result in exclusion of those children from research. Authors recommend involving minors in the decision-making about their children and adapting consent procedures so minor parents can participate and their children's vulnerabilities correctly addressed. |
| Morris M and Wilson P. (31) (2018) | Case study – research on the use of CPAP in intensive care settings                                        | Ghana          | Authors describe how consent was obtained, and express concern about the fact that there were no refusals and that this might reflect that consent was not fully informed or participation was not truly voluntary. The authors do not know to which extent parents understood randomization, or that CPAP could be used independently of study participation. They discuss how the lack of access for medical care might influence the consent process.                  |
| Zulu JM et al. (29) (2018)         | Review - Ethical challenges of post-abortion                                                               | Review         | Authors included 14 articles in their analysis. Regarding the consent process, challenges identified include                                                                                                                                                                                                                                                                                                                                                              |

|                               |                                                                                                                                |                    |                                                                                                                                                                                                                                                                                                                                                                         |
|-------------------------------|--------------------------------------------------------------------------------------------------------------------------------|--------------------|-------------------------------------------------------------------------------------------------------------------------------------------------------------------------------------------------------------------------------------------------------------------------------------------------------------------------------------------------------------------------|
|                               | care research in adolescents in LMICs                                                                                          |                    | difficulties in seeking consent from parents/guardians of adolescents who are below the consent age, vulnerability of adolescents compromising ability to make decisions, fear of losing access to health care affecting informed consent process, and inadequate guidance on how and when to involve communities in the consent process.                               |
| Ward CL et al. (32) (2018)    | Qualitative research – interviews with stakeholders about ethical aspects in a pediatric malaria vaccine trial                 | Ghana and Tanzania | Stakeholders identify the importance of community education and a well-adapted consent process in helping avoid misconception about trial benefits and healthcare service provision, as well as in preventing undue inducement by clearly stating risks and benefits.                                                                                                   |
| Woollet MA et al. (28) (2017) | Case study – consent for orphaned adolescents to participate in a mental health study                                          | South Africa       | Authors present how consent for research with orphaned adolescents had to be sought from the High Court before approval was granted by academic research committees. The authors discuss how the policy results in excluding vulnerable populations from research and give recommendations for mental health research with adolescents.                                 |
| Khabour O et al. (22) (2017)  | Qualitative research – focus groups to explore parental perceptions about the informed consent and assent process for research | Jordan             | Findings show an acceptable understanding of many aspects related to the consent process. However, some parents believed that informed consent is not necessary for questionnaire studies, there were discrepancies regarding the appropriate age for a child's assent, and some parents said they would force their child to participate regardless of child's wishes. |
| Mboizi R et al. (21) (2017)   | Mixed methods research – recall and decay of consent information among parents                                                 | The Gambia         | Recall of trial procedures and consent process was evaluated using questionnaires at two points in time. Results show overall good recall of consent when using the Speaking Book audiovisual tool. No differences were                                                                                                                                                 |

|                                 |                                                                                     |                              |                                                                                                                                                                                                                                                                                                                                                                                                                                                                                                                                                                                                     |
|---------------------------------|-------------------------------------------------------------------------------------|------------------------------|-----------------------------------------------------------------------------------------------------------------------------------------------------------------------------------------------------------------------------------------------------------------------------------------------------------------------------------------------------------------------------------------------------------------------------------------------------------------------------------------------------------------------------------------------------------------------------------------------------|
|                                 | using and audiovisual tool                                                          |                              | found between age, occupation, years of education, religion or family type.                                                                                                                                                                                                                                                                                                                                                                                                                                                                                                                         |
| Regmi P et al. (33) (2017)      | Review – informed consent in health research in LMICs                               | Nepal                        | Authors discuss challenges in adapting informed consent: verbal versus written informed consent in areas of limited literacy; difficulties posed by having to translate consent documents to local languages; issues around the legal age to consent, and how clear threshold ages of consent are not clear in local guidelines.                                                                                                                                                                                                                                                                    |
| Kalabuanga M et al. (18) (2016) | Case study – Description of the consent process during a malaria clinical trial     | Democratic Republic of Congo | Authors identified misunderstanding of the informed consent process among parents. They also identified cases where culturally-accepted guardians might not have legal authority to consent for research. They discuss how the use of a witness can impair parents' autonomy by exerting social pressure. In the context of limited access to care, the ancillary benefits of participating in research may be a strong incentive to participate.                                                                                                                                                   |
| Mandava A et al. (40) (2016)    | Review – comparison between consent processes in developing and developed countries | Review                       | Authors aimed to compare data about comprehension and voluntariness. In both settings comprehension of study information varies among participants, and comprehension of randomization and placebo use is poor. Participants in developing countries seem to be less likely to say they can refuse participation or withdraw and worry more about the consequences of doing so. Recommendations include developing validated questions to measure comprehension and voluntariness and conducting studies on the impact of cultural norms and socio-demographic characteristics on informed consent. |
| Joseph P et al. (45) (2016)     | Qualitative research – Stakeholders' views on                                       | n/a                          | Regarding the consent process, challenges identified by stakeholders include consent requirements in certain countries that conflict with adolescents'                                                                                                                                                                                                                                                                                                                                                                                                                                              |

|                                |                                                                                                                                   |                                   |                                                                                                                                                                                                                                                                                                                                                                                                                                                                                         |
|--------------------------------|-----------------------------------------------------------------------------------------------------------------------------------|-----------------------------------|-----------------------------------------------------------------------------------------------------------------------------------------------------------------------------------------------------------------------------------------------------------------------------------------------------------------------------------------------------------------------------------------------------------------------------------------------------------------------------------------|
|                                | international pediatric clinical trials                                                                                           |                                   | confidentiality rights; impracticality of using long consent forms with multiple required elements, and the need for guidelines to streamline consent form production.                                                                                                                                                                                                                                                                                                                  |
| Joseph P et al. (46) (2016)    | Review - Views of stakeholders on aspects of conducting research with children in LMICs                                           | n/a                               | Regarding informed consent, stakeholders believe that disempowerment, poor education, and difficulty in translating scientific concepts were barriers to informed decision making. Authors recommend simplifying consent forms and presenting them in culturally and linguistically appropriate format with verification of parental comprehension. Authors discuss that Western ethical principles of consent and child assent, autonomy, and individualism need to be contextualized. |
| Embleton L et al. (34) (2015)  | Case study - Ethical guidelines adaptation for three different studies with street connected youth and children                   | Kenya                             | The authors describe processes of consent for street-connected children and youth participating in three research projects. They discuss the importance of guidelines and working with local and international committees, ethicists, and the community to identify areas of special concern. Key recommendations include involving the community and working within the local sociocultural context.                                                                                   |
| Devries K et al. (24) (2015)   | Qualitative research - experiences of children participating in a cluster RCT of a school-based violence prevention intervention. | Uganda                            | Authors describe the consent process for the RCT and present findings from interviews conducted with children after participating. They found some therapeutic misconception about potential benefits and propose that clearer language in the consent forms might help avoid it.                                                                                                                                                                                                       |
| Martellet L et al. (17) (2015) | Case study – Informed consent for a                                                                                               | The Gambia, Mali, India, Senegal, | Informed consent for a vaccine trial was sought from parents/legal guardians of children 1-17 years. Written assent was taken from children                                                                                                                                                                                                                                                                                                                                             |



|                               |                                                                                                   |              |                                                                                                                                                                                                                                                                                                                                                                                                                                                                                                                                          |
|-------------------------------|---------------------------------------------------------------------------------------------------|--------------|------------------------------------------------------------------------------------------------------------------------------------------------------------------------------------------------------------------------------------------------------------------------------------------------------------------------------------------------------------------------------------------------------------------------------------------------------------------------------------------------------------------------------------------|
|                               | vaccine trial                                                                                     | Ghana        | 12-17. They used literate witnesses when participants/parents were illiterate and translated consent forms to local languages. In some areas, consent was done verbally. Written consent forms were always provided. Some study sites used tools to assess understanding of the research project prior to consent.                                                                                                                                                                                                                       |
| Morrow B et al. (35) (2015)   | Review – Consent for pediatric critical care research in South Africa                             | South Africa | Authors discuss legal issues in South Africa that create confusion for informed consent for children. They identify barriers to the consent process: impracticability of getting consent when urgent action is needed; the validity of consent in high-stress settings; addressing parents during stressful situations; sociocultural issues and the differences in communication and response to authority figures. The authors discuss alternatives to the process such as prospective informed consent or the deferred consent model. |
| Kamuya D et al.(15) (2015)    | Qualitative – focus groups and interviews conducted with participants of RSV and malaria studies. | Kenya        | Authors describe the phenomenon of silent refusal. Possible causes include avoiding conflict within households, maintaining a good relationship with the research team, and retaining study benefits. For women and young adults, it might be a way to exert agency within the patriarchal system. Authors discuss negotiations that take place during the consent process, and how ethical principles are interpreted and negotiated in a context-specific way.                                                                         |
| MacLeod SM et al. (11) (2015) | Review – ethical issues of pediatric drug trials in LMICs                                         | n/a          | The review discusses vulnerabilities of pediatric research participants, in particular children in LMICs. Authors discuss characteristics of the consent process, and how socioeconomic status, religious belief, and distribution of power affect decisions to participate. They point to the need to consider cultural differences, and the appropriateness of obtaining                                                                                                                                                               |

|  |  |  |                                     |
|--|--|--|-------------------------------------|
|  |  |  | community consent in some contexts. |
|--|--|--|-------------------------------------|

Confidential: For Review Only

|                                                                                                             |                                     |                                                                                                         |         |                                                                                                                                                                                                                                                                                                                                                                                                                                                                                                                                      |
|-------------------------------------------------------------------------------------------------------------|-------------------------------------|---------------------------------------------------------------------------------------------------------|---------|--------------------------------------------------------------------------------------------------------------------------------------------------------------------------------------------------------------------------------------------------------------------------------------------------------------------------------------------------------------------------------------------------------------------------------------------------------------------------------------------------------------------------------------|
| 1<br>2<br>3<br>4<br>5<br>6<br>7<br>8<br>9<br>10<br>11<br>12<br>13<br>14<br>15<br>16<br>17<br>18<br>19<br>20 | Serce O et al. (25) (2015)          | Quantitative- Questionnaires administered to parents to assess potential participation in research      | Turkey  | Authors perform univariate and multivariate logistic regression to identify characteristics that might predict participation. Factors associated with willingness to consent include satisfaction with the content of the informed consent and being a business owner. Factors associated with refusal of consent were older age of parents and owning a car. Parents responded that learning more about the trial and its benefits, ensuring health coverage, and payment of transport expenses would positively influence consent. |
| 21<br>22<br>23<br>24<br>25<br>26<br>27<br>28<br>29<br>30<br>31<br>32                                        | Millum J and Emanuel E. (52) (2015) | Case study – research with abandoned children                                                           | Romania | The authors discuss how research with abandoned children might be constrained by the challenge of getting informed consent. This might result in this vulnerable group not being included in research for reasons of convenience. They argue that vulnerable groups can be protected by enrolling them in studies that pose no or minimal risks.                                                                                                                                                                                     |
| 33<br>34<br>35<br>36<br>37<br>38<br>39<br>40<br>41<br>42                                                    | Swain T. (36) (2014)                | Commentary- barriers to pediatric clinical drug trials in low resource settings, with emphasis in India | India   | The author discusses how the consent process for research can be affected by poverty and lack of education. The author points out that the consent process should be clear and assent should be sought from children 7-18 years old, as per Indian guidelines. Consent for neonatal studies could be done in an opt-out way.                                                                                                                                                                                                         |
| 43<br>44<br>45<br>46<br>47<br>48<br>49<br>50<br>51<br>52<br>53<br>54<br>55<br>56                            | Angweny V et al. (37) (2014)        | Qualitative – interviews and group discussions with researchers, community members and parents          | Kenya   | Authors describe and analyze the community engagement process for the trial. Concerning the consent process, they present results on parents' understanding of the trial one year after recruitment. They report low levels of understanding about the purpose of the trial and the randomisation process. There appeared to be less understanding of the trial where there was less community engagement.                                                                                                                           |

|                                   |                                                                                                                                                              |              |                                                                                                                                                                                                                                                                                                                                                                                                                                                                                                                                                                                            |
|-----------------------------------|--------------------------------------------------------------------------------------------------------------------------------------------------------------|--------------|--------------------------------------------------------------------------------------------------------------------------------------------------------------------------------------------------------------------------------------------------------------------------------------------------------------------------------------------------------------------------------------------------------------------------------------------------------------------------------------------------------------------------------------------------------------------------------------------|
| Bekker L et al. (26) (2014)       | Review - Ethical issues of HIV research in resource limited countries                                                                                        | n/a          | The authors review ethical issues in HIV research with adolescents in LMICs. They point out best practices for consenting adolescents: auditing ethical-legal requirements for consent; involving adolescents in decision making; ensuring language, age, and cultural appropriateness; and giving sufficient time and resources to consent.                                                                                                                                                                                                                                               |
| Ruiz-Casares M et al. (51) (2014) | Review – culturally responsive mental health research                                                                                                        | n/a          | Regarding informed consent, the author discusses how to obtain culturally appropriate consent, how to ensure adequate understanding of the consent information, consideration of community structures, documenting informed consent, and determination of decision-making capacity.                                                                                                                                                                                                                                                                                                        |
| Offringa M et al. (38) (2013)     | Review - Background and summary of Standards for Research (StaR) in Child Health published standards on the conduction of pediatric clinical research        | n/a          | Summary of first 6 StaR Child Health published standards: 1. Consent and recruitment; 2. Containing risk of bias; 3. Data monitoring committees; 4. Determining adequate sample sizes; 5. Selection, measurement, and reporting of outcomes; and 6. Age groups for pediatric trials.                                                                                                                                                                                                                                                                                                       |
| Paré L et al. (47) (2013)         | Mixed methods research - assessment of the relevance of the informed consent procedure in a malaria trial comparing the efficacy of two different treatments | Burkina Faso | Results showed that prior knowledge of the trial was significantly associated with the decision to participate. Common reasons for participating were the perceived aid provided by the trial, better quality of care, and better quality of the medication. Information about confidentiality, right to withdraw from the study, and potential risks was poorly retained. Randomization was poorly understood. Authors aim to show that there are other factors besides the information received during the consent process that influence parents' decision to participate in the trial. |

|                              |                                                                                                                                                |       |                                                                                                                                                                                                                                                                                                                                                                                                                                                                                                        |
|------------------------------|------------------------------------------------------------------------------------------------------------------------------------------------|-------|--------------------------------------------------------------------------------------------------------------------------------------------------------------------------------------------------------------------------------------------------------------------------------------------------------------------------------------------------------------------------------------------------------------------------------------------------------------------------------------------------------|
| Daley C et al. (48) (2013)   | Review - ethical issues associated with ASD research in developing countries                                                                   | n/a   | Authors discuss ethical aspects relevant to the conduct of ASD research in developing countries. They mention challenges to informed consent such as parents' lack of knowledge about research.                                                                                                                                                                                                                                                                                                        |
| Vreeman R et al. (39) (2012) | Qualitative research - analysis of community discussion sessions regarding the participation of orphaned children in research.                 | Kenya | Results showed positive attitudes towards the participation of orphaned children in research, mainly because adults assumed that children would be directly benefited. Consent from parents or guardians was considered necessary but getting assent from children was not. The participation of the community in the consent process was considered appropriate. Authors recommend paying attention to misconceptions about research related benefits.                                                |
| Denburg A et al. (41) (2012) | Review – ethical aspects and challenges of pediatric oncology research in LMICs                                                                | n/a   | Authors conducted a review of ethical issues related to standards of care, trial benefits, ethics review and informed consent. They focused on the ethical implications of drug development and intervention research. Regarding informed consent, they discuss illiteracy, social and political power imbalances, validity of consent in face of ancillary benefits of research, mistrust of foreign investigators by parents, and difficulties aligning local perspectives with international norms. |
| Tindana P et al. (58) (2012) | Qualitative – interviews with research staff and mothers of study participants about the informed consent process for a malaria genetics study | Ghana | The consent process was adapted to include community leaders and groups of women. For individual consent, written forms were used but information was adapted to be more relevant to parents. The timing of consent for in-patient cases was modified to obtain it after children had been stabilized. The provision of medical care and direct benefits to children was identified as a motivation for participating.                                                                                 |

|                                 |                                                                                                                                                                |         |                                                                                                                                                                                                                                                                                                                                                                                                                                                                                                                                   |
|---------------------------------|----------------------------------------------------------------------------------------------------------------------------------------------------------------|---------|-----------------------------------------------------------------------------------------------------------------------------------------------------------------------------------------------------------------------------------------------------------------------------------------------------------------------------------------------------------------------------------------------------------------------------------------------------------------------------------------------------------------------------------|
| Rajamaran D et al. (23) (2011)  | Mixed methods research – analysis of relation between parents’ socio-demographic characteristics and likelihood of asking questions during the consent process | India   | The study looked at parents asking questions during the informed consent process. 13.4% of parents asked any questions. There was a high association between asking questions and socio-economic and educational status, and with presence of both parents. Authors conclude that consent materials should be interactive, to make comprehension easier, and that in pediatric trials effort should be made to get participation of both parents in the consent process.                                                          |
| Nabulsi M et al. (14) (2011)    | Qualitative research – perceptions of Lebanese parents about their children’s participation in research                                                        | Lebanon | Fear of potential harm or pain caused to children was identified as a main barrier to parental consent, as were complex consent forms and misunderstanding of randomization. Perceived direct benefits of participation, trust in the doctor and the institution, financial gains or previous positive experience with research identified as motivations to participate. Authors recommend improving communication and building trust with parents to enhance recruitment.                                                       |
| Mystakidou K et al. (42) (2009) | Review – informed consent in human HIV research in developing countries.                                                                                       | n/a     | In trials involving children and adolescents, authors discuss the process of enrolling subjects, including challenges in getting informed consent from parents or guardians while protecting the privacy of the subjects. Most studies on this topic involve adolescents, and there is limited data about the assent process in younger children. Authors discuss the characteristics that informed consent should have in the context of HIV trials in the developing world, including the need to address cultural differences. |
| Nakkash R et al. (43) (2009)    | Qualitative research – observation of the consent process for a two-phase                                                                                      | Lebanon | Researchers identified challenges to the consent process: incomplete disclosure of study information; complexity of terms and research design, compounded by low educational levels; issues related to                                                                                                                                                                                                                                                                                                                            |

|                              |                                                                                                                                 |              |                                                                                                                                                                                                                                                                                                                                                                                                                                                                           |
|------------------------------|---------------------------------------------------------------------------------------------------------------------------------|--------------|---------------------------------------------------------------------------------------------------------------------------------------------------------------------------------------------------------------------------------------------------------------------------------------------------------------------------------------------------------------------------------------------------------------------------------------------------------------------------|
|                              | preparatory study for an RCT to test the impact of a social skill-building intervention to improve mental health in adolescents |              | who could provide consent for the child; and social conceptions that youth are not capable of decision making. The greatest threat to the informed consent process was lack of voluntariness.                                                                                                                                                                                                                                                                             |
| Vreeman R et al. (49) (2009) | Case study - pediatric assent for a study on antiretroviral therapy                                                             | Kenya        | Authors describe the process of getting review by both US and Kenyan IRBs, mentioning that there is no guideline about how joint review should be conducted. Authors present the differences between the two countries regarding appropriate age for obtaining assent, and discuss local laws, practices, and international guidelines.                                                                                                                                   |
| Sarkar R et al. (54) (2009)  | Mixed methods research – comprehension and recall of informed consent process in a pediatric diarrhea study                     | India        | Findings showed low recall of study purposes four years after enrollment. Most respondents were mothers and mentioned spousal approval and free medical care for their children as main motivations to consent and remain in the study. Educational level was significantly associated with recall of study purpose. Few respondents knew they could leave the study at any time. Authors point out the need for continuous reinforcement of the consent process.         |
| Minnies D et al. (12) (2008) | Mixed methods – Recall of the consent process for a study of immune protection against TB                                       | South Africa | Mothers who had consented for the study then completed a questionnaire about key elements of informed consent, recall, and understanding. Most obtained scores greater than 75% for recall and understanding. 79% were aware of the risks and 64% knew participation was voluntary. A higher level of education and being consented by professional nurses were associated with higher recall. Authors suggest monitoring the quality of consent procedures periodically. |



|                                |                                                                                                                                                 |        |                                                                                                                                                                                                                                                                                                                                                                                                                                                                                                                            |
|--------------------------------|-------------------------------------------------------------------------------------------------------------------------------------------------|--------|----------------------------------------------------------------------------------------------------------------------------------------------------------------------------------------------------------------------------------------------------------------------------------------------------------------------------------------------------------------------------------------------------------------------------------------------------------------------------------------------------------------------------|
| Oduro AR et al. (55) (2008)    | Mixed methods research – Understanding and retention of informed consent process by parents of children participating in a malaria cohort study | Ghana  | Findings show overall good recall of procedural aspects of the study. Recall about study benefits was significantly higher than about study risks. Most knew participation was voluntary, but few knew they could withdraw at any time and that information was handled confidentially. Younger parental age was associated with better recall and understanding. Free medical treatment and benefits to the participant were strong motivations for enrolling.                                                            |
| Krosin MT et al. (56) (2006)   | Quantitative – parental understanding of the consent process for a malaria vaccine trial                                                        | Mali   | By using a multiple-choice questionnaire, researchers identified poor comprehension about withdrawal criteria, study side effects, and investigational rather than therapeutic nature of the intervention. Response rate and percentage of correct answers were higher in a more urban setting than in a rural one.                                                                                                                                                                                                        |
| Pace C et al. (50) (2005)      | Qualitative – quality of parental consent in an antimalarial study                                                                              | Uganda | Most respondents were mothers and had good recall of logistical aspects of the study and study purpose. Comprehension of randomization was low. The primary reason most respondents gave for enrolling their child was to obtain malaria treatment. Many parents felt pressure to enroll because their child was sick. Only 41% reported they could have refused and 65% knew they could quit.                                                                                                                             |
| Molyneux CS et al. (53) (2005) | Mixed methods research – community views about the informed consent process and trust                                                           | Kenya  | Findings show that trust in the research institution by the community is based on the perceived quality of clinical services it provides, and less on research activities. Trust in the research unit is an important reason behind community members' agreeing to participate in research. Responders valued the informed consent process but thought that low education and being in stressful situations impaired understanding. Authors suggest modifying consent procedures by not giving all information at once and |



1  
2  
3  
4  
5  
6  
7  
8  
9  
10  
11  
12  
13  
14  
15  
16  
17  
18  
19  
20  
21  
22  
23  
24  
25  
26  
27  
28  
29  
30  
31  
32  
33  
34  
35  
36  
37  
38  
39  
40  
41  
42  
43  
44  
45  
46  
47  
48  
49  
50  
51  
52  
53  
54  
55  
56  
57  
58  
59  
60

|  |  |  |                                   |
|--|--|--|-----------------------------------|
|  |  |  | testing to improve comprehension. |
|--|--|--|-----------------------------------|

Confidential: For Review Only

|                                |                                                                                                                                                            |            |                                                                                                                                                                                                                                                                                                                                                                                                                                                                                                                                                                                |
|--------------------------------|------------------------------------------------------------------------------------------------------------------------------------------------------------|------------|--------------------------------------------------------------------------------------------------------------------------------------------------------------------------------------------------------------------------------------------------------------------------------------------------------------------------------------------------------------------------------------------------------------------------------------------------------------------------------------------------------------------------------------------------------------------------------|
| Molyneux CS et al. (57) (2005) | Qualitative research - Community views regarding the informed consent process, in the context of studies being carried out by the KEMRI institute in Kenya | Kenya      | Results show that seeking consent from community elders is necessary but does not substitute the need for individual parental consent. Most respondents suggested males should make the decision to participate and that assent should not be sought from children before age 10-13. For inpatient studies, respondents identified illness severity, potential risks, and parents' ability to understand as factors influencing the consent process. Results of the study show some therapeutic misconception and discrepancies regarding which interventions need permission. |
| Bhutta Z. (10) (2004)          | Review - analysis of international guidelines on the subject of informed consent                                                                           | n/a        | Review and discussion of guidelines for obtaining informed consent. The discussion notes that more focus is put on written documentation of consent and less understanding of the process and adaptation to local contexts, and differences regarding when and how communities should be involved in the consent process.                                                                                                                                                                                                                                                      |
| McClure C et al. (27) (2004)   | Review - challenges to conducting HIV vaccine trials with adolescents, including in developing countries                                                   | n/a        | Authors identified challenges to HIV vaccine trials with adolescents. Adolescents are minors and need parental consent for participating in research. At the same time, their autonomy and privacy need to be respected. The consent process might be affected by less perception of personal risk.                                                                                                                                                                                                                                                                            |
| Leach A et al. (44) (1999)     | Qualitative research - Attitudes of the Gambian people to consent to medical research within the context of a H. influenzae vaccine trial.                 | The Gambia | Semi-structured interviews were conducted with study participants and refusers in urban and rural areas. Results showed that certain points of the trial were recalled well: 90% knew the purpose of the vaccine, but only 10% understood the placebo control design. The main motive for consenting was to receive the vaccine (93%), and for refusing was that the vaccine was experimental (35%) and might have side effects (29%). In all                                                                                                                                  |

|  |  |  |                                                         |
|--|--|--|---------------------------------------------------------|
|  |  |  | cases the decision was made by just one of the parents. |
|--|--|--|---------------------------------------------------------|

314

315 **DISCUSSION**

316 Children in low-resource settings are highly vulnerable to exploitation in research, because  
317 of circumstances including socioeconomic inequalities, limited access to health care, and  
318 high burden of illness.(59) In addition, even where international consensus exists around  
319 core ethical principles for providing protections to children as research subjects, it may be  
320 unclear how best to operationalize those principles in many low-resources settings, where  
321 gender norms, literacy, unfamiliarity with scientific research, and language barriers may all  
322 be important adaptive barriers. (10,11)

323

324 Through a scoping review of research reports and case studies from LMICs we identified,  
325 however, several core areas where existing research reports provided considerable insight  
326 and operational guidance which could likely be used to guide informed consent design  
327 processes in additional LMIC settings. These included: (1) *careful consideration of*  
328 *community hierarchy* was important, where consent for research may first proceed through  
329 a council of elders or other authority figure, prior to approaching individual caregivers; (2)  
330 *guidance on developing verbal consent procedures* in settings where caregivers have low  
331 literacy levels; (3) and *recognition of the challenges of consent indigenous or less-*  
332 *commonly spoken languages*, particularly when that language is not commonly written and  
333 where alternative procedures, such as audio recordings in the language in question, must be  
334 employed; and (4) *careful consideration of the possibility of therapeutic misconception* and

1  
2  
3 335 of developing consent procedures that ensure caregivers' comprehension of the potential  
4  
5 336 benefits (or lack thereof) and risks of research procedures for their children.  
6  
7

8 337 However, within these four broad thematic areas, we also noted the need for additional  
9  
10 338 careful investigation. In particular, here is considerable uncertainty on how to ensure the  
11  
12 339 principle of subsequent individual informed consent when community leaders or other  
13  
14 340 authorities are first approached. This is especially the case when gender power imbalance is  
15  
16 341 at play, and female caregivers may be either unempowered to consent or to opt out of a  
17  
18 342 research decision made by a male authority. In addition, the social status of individuals  
19  
20 343 administering or witnessing consent procedures may unduly influence the decision-making  
21  
22 344 of caregivers, and research is needed to better understand and accommodate for the  
23  
24 345 interpersonal dynamics of obtaining consent.  
25  
26  
27  
28

29 346 Finally, two thematic topics seem to be particularly underrepresented in the literature on  
30  
31 347 pediatric LMIC research, and more work is urgently needed. First, despite extensive  
32  
33 348 discussions about the difficulties of conducting research with adolescents, we found only  
34  
35 349 few studies with practical discussions or guidance on how to navigate these difficulties.  
36  
37 350 More investigation of the ethical conduct of research with adolescents is needed, with a  
38  
39 351 broader representation of health conditions, research designs, and geographic regions.  
40  
41 352 Second, despite strong representation of the principle of assent in international guidelines  
42  
43 353 on research with children and adolescents, we found little research of cultural and regional  
44  
45 354 differences around notions of assent and virtually no discussion of the mechanics of  
46  
47 355 assessing assent in research studies. Additional research into the topic of assent for research  
48  
49 356 among children in LMICs should be an important priority.  
50  
51  
52  
53  
54

55  
56 357

1  
2  
3  
4  
5  
6  
7  
8  
9  
10  
11  
12  
13  
14  
15  
16  
17  
18  
19  
20  
21  
22  
23  
24  
25  
26  
27  
28  
29  
30  
31  
32  
33  
34  
35  
36  
37  
38  
39  
40  
41  
42  
43  
44  
45  
46  
47  
48  
49  
50  
51  
52  
53  
54  
55  
56  
57  
58  
59  
60

358 **ABBREVIATIONS**

- 359 IRB: Institutional review board
- 360 LMIC: Low and middle-income country
- 361 RCT: Randomised clinical trial
- 362 STaR: Standards for Research in Child Health

Confidential: For Review Only

1  
2  
3 363 **FUNDING**  
4  
5

6 364 This work was unfunded.  
7  
8

9 365  
10  
11  
12  
13  
14  
15  
16  
17  
18  
19  
20  
21  
22  
23  
24  
25  
26  
27  
28  
29  
30  
31  
32  
33  
34  
35  
36  
37  
38  
39  
40  
41  
42  
43  
44  
45  
46  
47  
48  
49  
50  
51  
52  
53  
54  
55  
56  
57  
58  
59  
60

Confidential: For Review Only

1  
2  
3  
4  
5  
6  
7  
8  
9  
10  
11  
12  
13  
14  
15  
16  
17  
18  
19  
20  
21  
22  
23  
24  
25  
26  
27  
28  
29  
30  
31  
32  
33  
34  
35  
36  
37  
38  
39  
40  
41  
42  
43  
44  
45  
46  
47  
48  
49  
50  
51  
52  
53  
54  
55  
56  
57  
58  
59  
60

366 **COMPETING INTERESTS**

367 None.

368

Confidential: For Review Only

1  
2  
3 369 **AUTHOR'S CONTRIBUTIONS**  
4

5  
6 370 MC designed the search strategy, extracted data from articles, and wrote the first draft of  
7  
8 371 the manuscript. PR conceived the study, reviewed abstracts, and revised the manuscript.  
9

10  
11 372  
12

13  
14 373  
15  
16  
17  
18  
19  
20  
21  
22  
23  
24  
25  
26  
27  
28  
29  
30  
31  
32  
33  
34  
35  
36  
37  
38  
39  
40  
41  
42  
43  
44  
45  
46  
47  
48  
49  
50  
51  
52  
53  
54  
55  
56  
57  
58  
59  
60

Confidential: For Review Only



1  
2  
3  
4  
5  
6  
7  
8  
9  
10  
11  
12  
13  
14  
15  
16  
17  
18  
19  
20  
21  
22  
23  
24  
25  
26  
27  
28  
29  
30  
31  
32  
33  
34  
35  
36  
37  
38  
39  
40  
41  
42  
43  
44  
45  
46  
47  
48  
49  
50  
51  
52  
53  
54  
55  
56  
57  
58  
59  
60

374 **DATA SHARING STATEMENT**

375 Not applicable

376

Confidential: For Review Only

1  
2  
3 377 **ACKNOWLEDGMENTS**  
4

5 378 We thank research subjects and clinical staff at Maya Health Alliance for inspiring our  
6  
7 379 interest in this important topic.  
8  
9

10 380  
11  
12  
13  
14  
15  
16  
17  
18  
19  
20  
21  
22  
23  
24  
25  
26  
27  
28  
29  
30  
31  
32  
33  
34  
35  
36  
37  
38  
39  
40  
41  
42  
43  
44  
45  
46  
47  
48  
49  
50  
51  
52  
53  
54  
55  
56  
57  
58  
59  
60

Confidential: For Review Only

1  
2  
3  
4  
5  
6  
7  
8  
9  
10  
11  
12  
13  
14  
15  
16  
17  
18  
19  
20  
21  
22  
23  
24  
25  
26  
27  
28  
29  
30  
31  
32  
33  
34  
35  
36  
37  
38  
39  
40  
41  
42  
43  
44  
45  
46  
47  
48  
49  
50  
51  
52  
53  
54  
55  
56  
57  
58  
59  
60

381 **FIGURE LEGENDS**

382 **Figure 1. Results of Literature Screen.** Flow diagram depicting results of the literature  
383 search and review procedure.

384

385

386

Confidential: For Review Only

387 **REFERENCES**

- 388 1. Weindling P. The origins of informed consent: the international scientific  
389 commission on medical war crimes, and the Nuremberg Code. *Bull Hist Med*  
390 2001;75(1):37–71.
- 391 2. Rickham P. Human experimentation. Code of ethics of the World Medical  
392 Association. Declaration of Helsinki. *Br Med J* 1964;2(5402):177.
- 393 3. Council for International Organizations of Medical Sciences (CIOMS). International  
394 Ethical Guidelines for Health-related Research Involving Humans, Fourth Edition.  
395 [Internet]. 2016. Available from: [https://cioms.ch/wp-](https://cioms.ch/wp-content/uploads/2017/01/WEB-CIOMS-EthicalGuidelines.pdf)  
396 [content/uploads/2017/01/WEB-CIOMS-EthicalGuidelines.pdf](https://cioms.ch/wp-content/uploads/2017/01/WEB-CIOMS-EthicalGuidelines.pdf) (accessed 30 Jul  
397 2018).
- 398 4. Caldwell PH, Dans L, Newman J, et al. Standard 1: consent and recruitment.  
399 *Pediatrics* 2012;129:S118.
- 400 5. Klassen TP, Hartling L, Hamm M, et al. StaR Child Health: an initiative for RCTs in  
401 children. *Lancet* 2009 Oct 17;374(9698):1310–2.
- 402 6. Martinez B, Webb MF, Gonzalez A, et al. Complementary feeding intervention on  
403 stunted Guatemalan children : a randomised controlled trial. *BMJ Paediatr Open*  
404 2018;1–8.
- 405 7. World Medical Association. Declaration of Helsinki: Ethical Principles for Medical  
406 Research Involving Human Subjects. [Internet]. 2018. Available from:  
407 [https://www.wma.net/policies-post/wma-declaration-of-helsinki-ethical-principles-](https://www.wma.net/policies-post/wma-declaration-of-helsinki-ethical-principles-for-medical-research-involving-human-subjects)  
408 [for-medical-research-involving-human-subjects](https://www.wma.net/policies-post/wma-declaration-of-helsinki-ethical-principles-for-medical-research-involving-human-subjects) (accessed 30 Jul 2018).

- 1  
2  
3 409 8. National Bioethics Advisory Commission. Ethical and Policy Issues Research:  
4  
5 410 Clinical Trials in Developing Countries Vol. 1 [Internet]. 2001. Available from:  
6  
7 411 <http://bioethics.georgetown.edu/nbac/clinical/Vol1.pdf> (accessed 30 Jul 2018).  
8  
9  
10 412 9. European Commission. Clinical Trials: Directive 2001/20/EC. [Internet]. 2001.  
11  
12 413 Available from: [https://ec.europa.eu/health/sites/health/files/files/eudralex/vol-](https://ec.europa.eu/health/sites/health/files/files/eudralex/vol-1/dir_2001_20/dir_2001_20_en.pdf)  
13  
14 414 [1/dir\\_2001\\_20/dir\\_2001\\_20\\_en.pdf](https://ec.europa.eu/health/sites/health/files/files/eudralex/vol-1/dir_2001_20/dir_2001_20_en.pdf) (accessed 30 Jul 2018).  
15  
16  
17  
18 415 10. Bhutta ZA. Beyond informed consent. *Bull World Health Organ* 2004  
19  
20 416 Oct;82(10):771–7.  
21  
22  
23 417 11. MacLeod SM, Knoppert DC, Stanton-Jean M, et al. Pediatric clinical drug trials in  
24  
25 418 low-income countries: key ethical issues. *Paediatr Drugs* 2015 Feb;17(1):83–90.  
26  
27  
28 419 12. Minnies D, Hawkrige T, Hanekom W, et al. Evaluation of the quality of informed  
29  
30 420 consent in a vaccine field trial in a developing country setting. *BMC Med Ethics*  
31  
32 421 2008;9:1–9.  
33  
34  
35  
36 422 13. Halmsted Kongsholm NC, Lassen J, Sandoe P. “I didn’t have anything to decide, I  
37  
38 423 wanted to help my kids” - An interview-based study of consent procedures for  
39  
40 424 sampling human biological material for genetic research in rural Pakistan. *AJOB*  
41  
42 425 *Empir Bioeth* 2018;4515(April 2014):1–35.  
43  
44  
45  
46 426 14. Nabulsi M, Khalil Y, Makhoul J. Parental attitudes towards and perceptions of their  
47  
48 427 children’s participation in clinical research: A developing-country perspective. *J*  
49  
50 428 *Med Ethics* 2011;37(7):420–3.  
51  
52  
53  
54 429 15. Kamuya DM, Theobald SJ, Marsh V, et al. “The one who chases you away does not  
55  
56 430 tell you go”: silent refusals and complex power relations in research consent  
57  
58  
59  
60

- 1  
2  
3 431 processes in Coastal Kenya. *PLoS One* 2015;10(5):e0126671.
- 4  
5  
6 432 16. Macrae DJ. The Council for International Organizations and Medical Sciences  
7  
8 433 (CIOMS) guidelines on ethics of clinical trials. *Proc Am Thorac Soc* 2007  
9  
10 434 May;4(2):176–8.
- 11  
12  
13 435 17. Martellet L, Sow SO, Diallo A, et al. Ethical challenges and lessons learned during  
14  
15 436 the clinical development of a group A meningococcal conjugate vaccine. *Clin Infect*  
16  
17 437 *Dis* 2015 Nov;61 Suppl 5:S422-7.
- 18  
19  
20  
21 438 18. Kalabuanga M, Ravinetto R, Maketa V, et al. The challenges of research informed  
22  
23 439 consent in socio-economically vulnerable populations: a viewpoint from the  
24  
25 440 Democratic Republic of Congo. *Dev World Bioeth* 2016;16(2):64–9.
- 26  
27  
28 441 19. Fitzpatrick EFM, Martiniuk ALC, D’Antoine H, et al. Seeking consent for research  
29  
30 442 with indigenous communities: a systematic review. *BMC Med Ethics* 2016  
31  
32 443 Oct;17(1):65.
- 33  
34  
35  
36 444 20. Flood D, Rohloff P. Indigenous languages and global health. *Lancet Glob Health*  
37  
38 445 2018;6(2):e134–5.
- 39  
40  
41 446 21. Mboizi RB, Afolabi MO, Okoye M, et al. Recall and decay of consent information  
42  
43 447 among parents of infants participating in a randomized controlled clinical trial using  
44  
45 448 an audio-visual tool in The Gambia. *Hum Vaccin Immunother* 2017  
46  
47 449 Sep;13(9):2185–91.
- 48  
49  
50  
51 450 22. Khabour OF, Alomari MA, Al-Sheyab NA. Parental perceptions about informed  
52  
53 451 consent/assent in pediatric research in Jordan. *J Empir Res Hum Res Ethics* 2017  
54  
55 452 Oct;12(4):261–8.
- 56  
57  
58  
59  
60

- 1  
2  
3 453 23. Rajaraman D, Jesuraj N, Geiter L, et al. How participatory is parental consent in low  
4  
5 454 literacy rural settings in low income countries? Lessons learned from a community  
6  
7 455 based study of infants in South India. *BMC Med Ethics* 2011 Feb;12:3.  
8  
9  
10 456 24. Devries KM, Child JC, Elbourne D, et al. “I never expected that it would happen,  
11  
12 457 coming to ask me such questions”: ethical aspects of asking children about violence  
13  
14 458 in resource poor settings. *Trials* 2015 Nov;16:516.  
15  
16  
17  
18 459 25. Serce O, Gonen I, Bakir M. Factors influencing parental consent in a hypothetical  
19  
20 460 pediatric vaccine trial in a developing country setting: a questionnaire study. *Account*  
21  
22 461 *Res* 2015;22(1):1–13.  
23  
24  
25  
26 462 26. Bekker L, Slack C, Lee S, et al. Ethical issues in adolescent HIV research in  
27  
28 463 resource-limited countries. *J Acquir Immune Defic Syndr* 2014;65(Supplement  
29  
30 464 1):24–8.  
31  
32  
33 465 27. McClure CA, Gray G, Rybczyk GK, et al. Challenges to conducting HIV  
34  
35 466 preventative vaccine trials with adolescents. *J Acquir Immune Defic Syndr* 2004  
36  
37 467 Jun;36(2):726–33.  
38  
39  
40  
41 468 28. Woollett N, Peter J, Cluver L, et al. Enrolling HIV-positive adolescents in mental  
42  
43 469 health research : a case study reflecting on legal and ethical complexities. *S Afr Med*  
44  
45 470 *J* 2017;107(8):679–83.  
46  
47  
48 471 29. Zulu JM, Ali J, Hallez K, et al. Ethics challenges and guidance related to research  
49  
50 472 involving adolescent post-abortion care: A scoping review. *Reprod Health*  
51  
52 473 2018;15(1):1–10.  
53  
54  
55  
56 474 30. Ott MA, Crawley FP, Saez-Llorens X, et al. Ethical considerations for the  
57  
58  
59  
60

- 1  
2  
3 475 participation of children of minor parents in clinical trials. *Paediatr Drugs* 2018  
4  
5 476 Jun;20(3):215–22.  
6  
7  
8 477 31. Morris MC, Wilson PT. Medical device research in resource-poor settings: a  
9  
10 478 paediatric case study in Ghana. *IRB* 2014;36(4):1–7.  
11  
12  
13 479 32. Ward CL, Shaw D, Anane-Sarpong E, et al. The ethics of health care delivery in a  
14  
15 480 paediatric malaria vaccine trial: the perspectives of stakeholders from Ghana and  
16  
17 481 Tanzania. *J Empir Res Hum Res Ethics* 2018;13(1):26–41.  
18  
19  
20  
21 482 33. Regmi PR, Aryal N, Kurmi O, et al. Informed consent in health research: challenges  
22  
23 483 and barriers in low-and middle-income countries with specific reference to Nepal.  
24  
25 484 *Dev World Bioeth* 2017;17(2):84–9.  
26  
27  
28 485 34. Embleton L, Ott MA, Wachira J, et al. Adapting ethical guidelines for adolescent  
29  
30 486 health research to street-connected children and youth in low- and middle-income  
31  
32 487 countries: a case study from western Kenya. *BMC Med Ethics* 2015;16:89.  
33  
34  
35  
36 488 35. Morrow BM, Argent AC, Kling S. Informed consent in paediatric critical care  
37  
38 489 research--a South African perspective. *BMC Med Ethics* 2015 Sep;16:62.  
39  
40  
41 490 36. Swain TR. Clinical trials for children: some concerns. *Indian J Pharmacol*  
42  
43 491 2014;46(2):145–6.  
44  
45  
46 492 37. Angwenyi V, Kamuya D, Mwachiro D, et al. Complex realities: community  
47  
48 493 engagement for a paediatric randomized controlled malaria vaccine trial in Kilifi,  
49  
50 494 Kenya. *Trials* 2014 Feb;15:65.  
51  
52  
53  
54 495 38. Offringa M, Needham AC, Chan WWY. StaR Child Health: Improving global  
55  
56  
57  
58  
59  
60



- standards for child health research. *Early Hum Dev* 2013;89(11):861–4.
39. Vreeman R, Kamaara E, Kamanda A, et al. Community perspectives on research consent involving vulnerable children in western Kenya. *J Empir Res Hum Res Ethics* 2012;7(4):44–55.
40. Mandava A, Pace C, Campbell B, et al. The quality of informed consent: mapping the landscape. A review of empirical data from developing and developed countries. *J Med Ethics* 2016;38(6):356–65.
41. Denburg AE, Joffe S, Gupta S, et al. Pediatric oncology research in low income countries: ethical concepts and challenges. *Pediatr Blood Cancer* 2012 Apr;58(4):492–7.
42. Mystakidou K, Panagiotou I, Katsaragakis S, et al. Ethical and practical challenges of implementing informed consent in HIV/AIDS clinical trials in developing or resource-limited countries. *SAHARA J* 2009;6(2):46–57.
43. Nakkash R, Makhoul J, Afifi R. Obtaining informed consent: observations from community research with refugee and impoverished youth. *J Med Ethics* 2009 Oct;35(10):638–43.
44. Leach A, Hilton S, Greenwood BM, et al. An evaluation of the informed consent procedure used during a trial of a *Haemophilus influenzae* type B conjugate vaccine undertaken in The Gambia, West Africa. *Soc Sci Med* 1999;48(2):139–48.
45. Joseph PD, Craig JC, Tong A, et al. Researchers', regulators', and sponsors' views on pediatric clinical trials: a multinational study. *Pediatrics* 2016;138(4):e20161171

- 1  
2  
3 517 46. Joseph PD, Caldwell PH, Tong A. Stakeholder views of clinical trials in low- and  
4  
5 518 middle-income countries : a systematic review. *Pediatrics* 2016;137(2):e20152800.  
6  
7  
8 519 47. Paré Toe L, Ravinetto RM, Dierickx S, et al. Could the decision of trial participation  
9  
10 520 precede the informed consent process? Evidence from Burkina Faso. *PLoS One*  
11  
12 521 2013;8(11):e80800.  
13  
14  
15 522 48. Daley TC, Singhal N, Krishnamurthy V. Ethical considerations in conducting  
16  
17 523 research on autism spectrum disorders in low and middle income countries. *J Autism*  
18  
19 524 *Dev Disord* 2013;43(9):2002–14.  
20  
21  
22  
23 525 49. Vreeman RC, Nyandiko WM, Meslin EM. Pediatric assent for a study of  
24  
25 526 antiretroviral therapy dosing for children in western Kenya: a case study in  
26  
27 527 international research collaboration. *J Empir Res Hum Res Ethics* 2009;4(1):3–16.  
28  
29  
30  
31 528 50. Pace C, Talisuna A, Wendler D, et al. Quality of parental consent in a Ugandan  
32  
33 529 malaria study. *Am J Public Health* 2005;95(7):1184–9.  
34  
35  
36 530 51. Ruiz-Casares M. Research ethics in global mental health: Advancing culturally  
37  
38 531 responsive mental health research. *Transcult Psychiatry* 2014;51(6):790–805.  
39  
40  
41 532 52. Millum J, Emanuel E. The ethics of international research with abandoned children.  
42  
43 533 *Science* 2007;318:1874-5.  
44  
45  
46 534 53. Molyneux CS, Peshu N, Marsh K. Trust and informed consent: insights from  
47  
48 535 community members on the Kenyan coast. *Soc Sci Med* 2005;61(7):1463–73.  
49  
50  
51  
52 536 54. Sarkar R, Grandin EW, Gladstone BP, et al. Comprehension and recall of informed  
53  
54 537 consent among participating families in a birth cohort study on diarrhoeal disease.  
55  
56  
57  
58  
59  
60

- 1  
2  
3 538 *Public Health Ethics* 2009;2(1):37–44.  
4  
5  
6 539 55. Oduro AR, Aborigo RA, Amugsi D, et al. Understanding and retention of the  
7  
8 540 informed consent process among parents in rural northern Ghana. *BMC Med Ethics*  
9  
10 541 2008;9:12.  
11  
12  
13 542 56. Krosin MT, Klitzman R, Levin B, et al. Problems in comprehension of informed  
14  
15 543 consent in rural and peri-urban Mali, west Africa. *Clin Trials* 2006;3(3):306–13.  
16  
17  
18 544 57. Molyneux CS, Wassenaar DR, Peshu N, et al. “Even if they ask you to stand by a  
19  
20 545 tree all day, you will have to do it (laughter)...!”: Community voices on the notion  
21  
22 546 and practice of informed consent for biomedical research in developing countries.  
23  
24 547 *Soc Sci Med* 2005;61(2):443–54.  
25  
26  
27  
28 548 58. Tindana P, Bull S, Amenga-Etego L, et al. Seeking consent to genetic and genomic  
29  
30 549 research in a rural Ghanaian setting: A qualitative study of the MalariaGEN  
31  
32 550 experience. *BMC Med Ethics* 2012;13(1):1.  
33  
34  
35  
36 551 59. Initiative for Vaccine Research, World Health Organization. Ethical considerations  
37  
38 552 arising from vaccine trials conducted in paediatric populations with high disease  
39  
40 553 burden in developing countries. WHO/IRV Ethics Meeting, November 26–28, 2002  
41  
42 554 Accra, Ghana [Internet]. 2002. Available from:  
43  
44 555 [http://www.who.int/ethics/topics/vaccinetrials\\_pediatric\\_ivr\\_en\\_2002.pdf](http://www.who.int/ethics/topics/vaccinetrials_pediatric_ivr_en_2002.pdf) (accessed  
45  
46 556 30 Jul 2018).  
47  
48  
49  
50  
51 557  
52  
53  
54 558  
55  
56  
57  
58  
59  
60

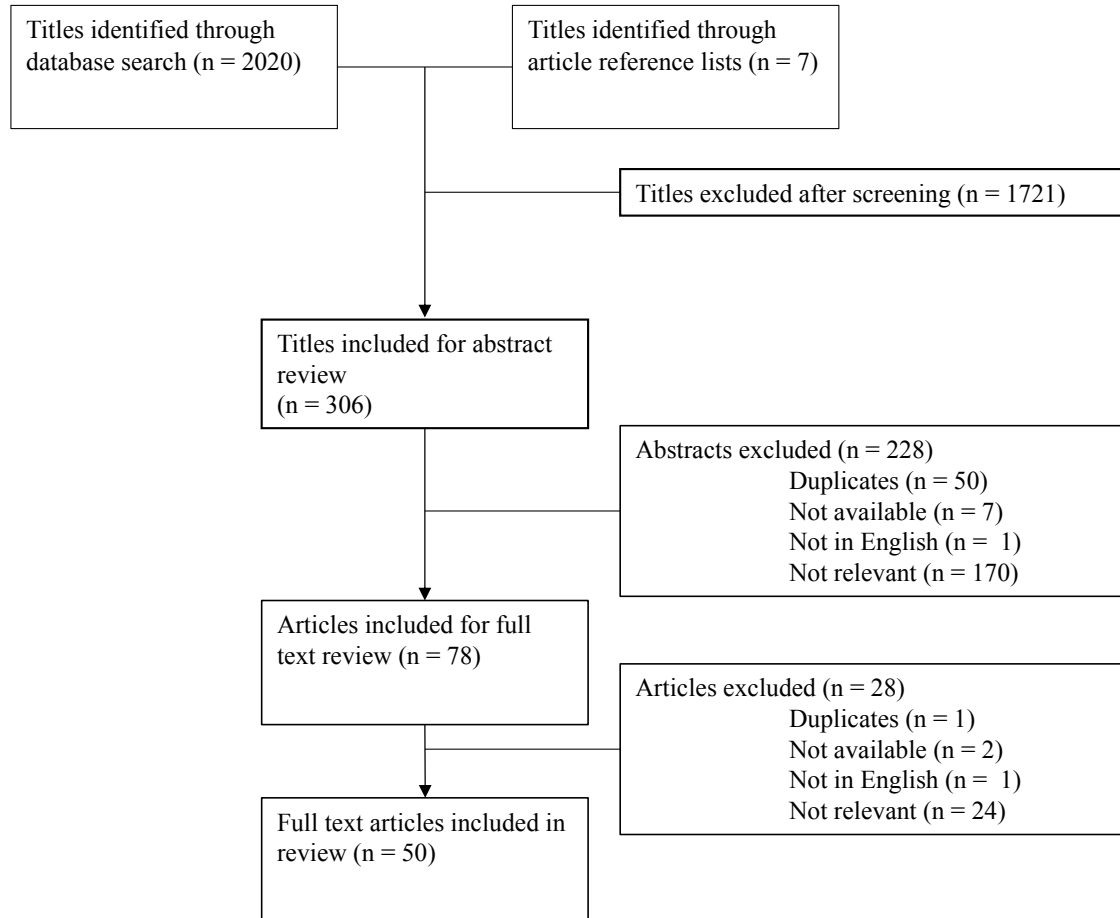

1  
2  
3  
4  
5  
6  
7  
8  
9  
10  
11  
12  
13  
14  
15  
16  
17  
18  
19  
20  
21  
22  
23  
24  
25  
26  
27  
28  
29  
30  
31  
32  
33  
34  
35  
36  
37  
38  
39  
40  
41  
42  
43  
44  
45  
46  
47

# BMJ Paediatrics Open

## **Cultural considerations for informed consent in pediatric research in low and middle income countries: A scoping review**

|                               |                                            |
|-------------------------------|--------------------------------------------|
| Journal:                      | <i>BMJ Paediatrics Open</i>                |
| Manuscript ID                 | bmjpo-2018-000298.R1                       |
| Article Type:                 | Original article                           |
| Date Submitted by the Author: | 26-Sep-2018                                |
| Complete List of Authors:     | Colom, Marcela; Wuqu' Kawoq Rohloff, Peter |
| Keywords:                     | Ethics, Health services research           |
|                               |                                            |

SCHOLARONE™  
Manuscripts

1  
2  
3 1 **TITLE PAGE**  
4

5 2

6  
7 3 **Cultural considerations for informed consent in pediatric research in low and middle**  
8 **income countries: A scoping review**  
9  
10 4

11 5

12  
13  
14 6 Marcela Colom MD<sup>1</sup>, Peter Rohloff MD PhD<sup>1,2,3</sup>  
15  
16

17 7

18  
19 8 <sup>1</sup>Wuqu' Kawoq | Maya Health Alliance, 2da Avenida 3-48 Zona 3, Barrio Patacabaj,  
20  
21 9 Tecpán, Chimaltenango, Guatemala  
22  
23

24 10

25  
26 11 <sup>2</sup>Division of Global Health Equity, Brigham and Women's Hospital, Boston, MA, USA  
27  
28 12

29 12

30  
31 13 <sup>3</sup> Corresponding Author. Peter Rohloff, Brigham and Women's Hospital, 75 Francis Street,  
32  
33 14 Boston, MA, 02115. Phone: 617-278-0055. Fax: 888-372-2354. Email:  
34  
35 15 prohloff@bwh.harvard.edu  
36  
37

38 16

39  
40 17

41  
42 18

43  
44 19 Word count: 3701  
45  
46

47 20

48  
49 21

50  
51 22

52  
53 23  
54  
55  
56  
57  
58  
59  
60

## 24 WHAT IS KNOWN ABOUT THIS SUBJECT

- 25 • Conducting research with children in low- and middle-income countries (LMICs)  
26 requires careful consideration of socioeconomic inequalities and cultural and  
27 linguistic differences.
- 28 • Existing international standards for the conduct of ethical pediatric research advance  
29 core concepts, such as informed consent, voluntariness, and assent, but there often  
30 is limited guidance on how to adapt and operationalize these for LMIC settings.

## 31 WHAT THIS STUDY ADDS

- 32 • Through a scoping review of published literature discussing informed consent for  
33 pediatric research in LMICs, we identified helpful examples and emerging  
34 consensus for best practices in community engagement, verbal and alternative  
35 consent procedures, and guarding against therapeutic misconception by caregivers  
36 in interventional and randomized controlled trial designs.
- 37 • We also identified the need for additional research where less consensus was  
38 apparent, especially around the protection of the individual autonomy of caregivers  
39 and safeguarding children's own assent to participate in research.

1  
2  
3 **43 ABSTRACT**  
4  
5  
6 **44**

7  
8 **45** Introduction: Conducting research with children in low- and middle-income countries  
9  
10 **46** (LMICs) requires consideration of socioeconomic inequalities and cultural and linguistic  
11  
12 **47** differences. Our objective was to survey the literature on informed consent in pediatric  
13  
14 **48** LMIC research, assessing for practical guidance for culturally- and linguistically-  
15  
16 **49** appropriate procedures.  
17  
18

19 **50**  
20  
21 **51** Methods: We conducted a scoping review on informed consent in pediatric LMIC research  
22  
23 **52** searching the Pubmed, Web of Science and PsycINFO databases. Eligible articles were  
24  
25 **53** published in English, from any date range, of any study design or format.  
26  
27  
28 **54**

29  
30 **55** Results: The search identified 2,027 references, of which 50 were included in the analysis  
31  
32 **56** following full-text review. Reviewed guidelines emphasized individual, informed and  
33  
34 **57** voluntary consent from parents and caregivers. Reviewed articles provided detailed  
35  
36 **58** practical guidance on adapting these guiding principles to LMIC settings, including  
37  
38 **59** considerations for community engagement, verbal or other alternative consent procedures  
39  
40 **60** for low-literacy settings or less-commonly spoken languages, and guarding against  
41  
42 **61** therapeutic misconception by caregivers. There was uncertainty, however, on how to best  
43  
44 **62** protect individual autonomy, especially when influenced by gender dynamics, leadership  
45  
46 **63** hierarchies, or the social status of researchers themselves. There was, furthermore, limited  
47  
48 **64** research discussing the special case of research involving adolescents or of procedures for  
49  
50 **65** documenting assent by participating children.  
51  
52  
53  
54 **66**



1  
2  
3 67 Conclusions: A scoping review of pediatric research in LMICs revealed substantial  
4  
5 68 guidance on several features of culturally appropriate informed consent . However,  
6  
7 69 additional research and guidance is needed, especially in the areas of gender imbalances,  
8  
9  
10 70 research with adolescents, and children's own assent to participate in research.  
11  
12  
13 71  
14  
15 72  
16  
17  
18  
19  
20  
21  
22  
23  
24  
25  
26  
27  
28  
29  
30  
31  
32  
33  
34  
35  
36  
37  
38  
39  
40  
41  
42  
43  
44  
45  
46  
47  
48  
49  
50  
51  
52  
53  
54  
55  
56  
57  
58  
59  
60

## 73 INTRODUCTION

74

75 Prior to World War II, there was little international consensus on the ethical conduct of  
76 human subjects' research. The Nuremberg code, developed in 1947 during the Nuremberg  
77 war crimes trials, was one of the first attempts to articulate basic ethical principles, such as  
78 the right to informed consent.(1) Subsequently, the World Medical Association's (WMA)  
79 Declaration of Helsinki in 1964 provided a more definitive consensus statement on the core  
80 principles of ethical conduct of research--beneficence, self-determination, and informed  
81 consent—which is widely considered the foundational international document in modern  
82 research ethics.(2) Practical guidance on ethical practice is well codified in the joint  
83 statements produced by the Council for International Organizations of Medical Sciences  
84 (CIOMS) and the World Health Organization (WHO).(3)

85

86 Extension of ethical research principles to include considerations appropriate for research  
87 in pediatric populations are also important, including guidance on obtaining informed  
88 consent from parents or guardians, obtaining assent from children themselves, and  
89 weighing the balance of risks and benefits of proposed research.(3,4) Improvements in the  
90 conduct and volume of pediatric clinical trials, which have historically been few in number  
91 and of lower quality than corresponding trials in adult subjects, have also recently been  
92 advocated.(5)

93

94 However, there still remains uncertainty around how best to implement international ethical  
95 principles of pediatric research in some settings. This is especially the case in low and  
96 middle-income countries (LMICs), and in research with groups such as indigenous

1  
2  
3 97 populations, speakers of less-common languages, or populations with high levels of  
4  
5 98 illiteracy. Practically, we experienced this recently while designing a clinical trial of a  
6  
7 99 nutrition intervention for indigenous Maya children in rural Guatemala, and our experience  
8  
9  
10 100 navigating consent, literacy, and translingual adaptation in this population prompted our  
11  
12 101 interest in more formally exploring the topic.(6) To this end, here we conduct a scoping  
13  
14 102 review of the existing literature on cultural and contextual considerations for informed  
15  
16 103 consent in the conduct of pediatric research in LMICs. Through this review, we identify  
17  
18 104 evidence for specific culturally- and contextually-sensitive practices, as well as areas where  
19  
20 105 additional research and guideline development is needed.  
21  
22  
23  
24 106

## 25 26 107 **METHODS**

### 27 28 108 29 30 109 **Search and inclusion strategy**

31  
32 110  
33  
34  
35 111 To identify articles, we searched the PubMed, Web of Science and PsycINFO databases.  
36  
37 112 We conducted searches using a combination of the following key terms: “pediatric” or  
38  
39 113 “children” or “adolescents”; “research” or “biomedical research”; “consent” or “informed  
40  
41 114 consent” or “ethics”; “developing countries” or “low income countries” or “middle income  
42  
43 115 countries”; “illiteracy”; “culturally competent”. We used no date limits and included all  
44  
45 116 articles published through May 2018. In addition, we visited the websites of international  
46  
47 117 health policy organizations to identify ethics guidelines for the conduct of research in low-  
48  
49 118 and middle-income countries. We also manually reviewed the reference lists of articles  
50  
51 119 identified using the above methods. For this scoping review, of the articles identified above  
52  
53 120 we included for analysis any type of study design or format (original research, commentary,  
54  
55  
56  
57  
58  
59  
60

1  
2  
3 121 case study, review, expert opinion), which addressed the informed consent process  
4  
5 122 specifically for pediatric or adolescent populations in low or middle-income  
6  
7 123 countries. Articles not in English were excluded.  
8  
9

10 124

## 11 125 **Data extraction and synthesis**

12 126

13  
14  
15  
16  
17 127 We exported identified articles into an Excel spreadsheet template which recorded location  
18  
19 128 of study, study type and design, study context, aspects of informed consent examined, and  
20  
21 129 key findings. Both authors reviewed the study titles and abstracts. After removal of articles  
22  
23 130 which were deemed not eligible for inclusion, one author (MC) performed a full text review  
24  
25 131 of all the remaining articles. As a scoping review to assess the patterns of existing  
26  
27 132 literature on informed consent in LMIC pediatric research, assessments of individual study  
28  
29 133 bias and quality were not performed. Data extracted from articles was collated in summary  
30  
31 134 form (Table 1), and major qualitative findings are presented in the following narrative  
32  
33 135 synthesis.  
34  
35  
36  
37

38 136

## 39 137 **RESULTS**

40 138

### 41 139 **Results of literature screen**

42 140

43  
44  
45  
46  
47  
48  
49 141 A total of 2,027 candidate titles were identified through database searches, supplemented  
50  
51 142 by reference list and website reviews. Of these, 1,721 did not meet eligibility criteria, and  
52  
53 143 306 were included for abstract review. If the abstract was not available but full text was, the  
54  
55 144 title was included for full text review. After abstract review, 50 duplicates were found, one  
56  
57  
58  
59  
60

1  
2  
3 145 was not in English, 7 were not available (abstract nor full text), and 170 abstracts did not  
4  
5 146 meet inclusion criteria. 78 articles were selected for full text review, of which 24  
6  
7 147 subsequently did not meet inclusion criteria, one was in French, one was a duplicate, and  
8  
9 148 two did not have available full text. Therefore 50 full-text articles were included in this  
10  
11 149 review (Figure 1, Table 1, Supplementary Table 1). Of the articles excluded at the abstract  
12  
13 150 and full text review stages, the most common reasons for exclusion were: no mention of the  
14  
15 151 informed consent process for research with pediatric or adolescent populations; research  
16  
17 152 not taking place in a low- or middle-income country; articles on pediatric research in low-  
18  
19 153 or middle-income countries that did not discuss the informed consent process  
20  
21  
22  
23  
24  
25

### 26 155 **Summary of guidelines and commentaries**

27  
28 156  
29  
30 157 We identified seven guidelines that addressed issues of informed consent in international  
31  
32 158 settings and in research involving children in our scoping review. Of these, we selected for  
33  
34 159 detailed review five that were most comprehensive, summarizing key recommendations in  
35  
36 160 Table 1. All guidelines emphasize the importance of obtaining individual, informed and  
37  
38 161 voluntary consent for research.(3,4,7–9) Importantly, however, the guidelines do not  
39  
40 162 necessarily specify in detail how best to operationalize assessment of these core principles.  
41  
42 163 For example, the Declaration of Helsinki comments only that informed consent requires  
43  
44 164 that a subject be adequately informed of the “aims, methods, sources of funding, any  
45  
46 165 possible conflicts of interest, institutional affiliations of the researcher, the anticipated  
47  
48 166 benefits and potential risks of the study and the discomfort it may entail, post-study  
49  
50 167 provisions and any other relevant aspects of the study” (Article 26). (7) Similarly, on  
51  
52  
53  
54  
55  
56  
57  
58  
59  
60

1  
2  
3 168 voluntariness, the CIOMS guidelines note only that consent is voluntary if “an individual’s  
4  
5 169 decision to participate is free of undue influence” (p. 35). (3)  
6  
7

8  
9 170

10  
11 171 Some of the guidelines do suggest modifications appropriate for lower-resource settings,  
12  
13 172 such as obtaining witnessed verbal consent when literacy is a barrier. (7,9) The United  
14  
15 173 States National Bioethics Advisory Commission (NBAC) also acknowledges that oral  
16  
17 174 consent might even be preferable in some circumstances.(8) However, as other  
18  
19 175 commentaries note, there is little specificity on how best to operationalize these  
20  
21 176 suggestions, such as how to formally document verbal consent or characteristics of a  
22  
23 177 qualified witness.(10,11)  
24  
25  
26  
27

28 178

29  
30  
31 179 Another important consideration of LMIC research addressed in guidelines is an emphasis  
32  
33 180 on the need to at times obtain consent from community stakeholders and leaders, or other  
34  
35 181 key local decision makers. Nevertheless, all guidelines unanimously assert that community-  
36  
37 182 based consent can never replace individual consent. When local cultural practices around  
38  
39 183 community-based consent contradict core principles of the international consensus on the  
40  
41 184 informed consent process, such as the need for voluntary individual consent, researchers are  
42  
43 185 advised to search for culturally sensitive ways of providing all information to potential  
44  
45 186 participants without compromising the substantive ethical standard of informed consent, an  
46  
47 187 adaptive process in which local research ethics committees are expected to place a  
48  
49 188 substantial role. (8,10–12)  
50  
51  
52  
53

54  
55 189  
56  
57  
58  
59  
60

1  
2  
3 190 Finally, with respect to children or adolescents not capable of providing informed consent,  
4  
5 191 in addition to obtaining consent from parents or legal representatives, most guidelines also  
6  
7 192 reinforce the need to obtain assent from the child or adolescent in an age-appropriate way.  
8  
9  
10 193 (3,4,7,9) The CIOMS guidelines note that assent is “a process...not merely the absence of  
11  
12 194 dissent” and requires “meaningful[1] engage[ment] in the research discussion in accordance  
13  
14 195 with...capacities” (p. 67). (3) They also note that as adolescents reach the age of maturity,  
15  
16 196 their agreement to participate may be ethically considered as informed consent. However, if  
17  
18 197 they legally remain minors, researchers are cautioned that consent from a parent is still  
19  
20 198 generally needed, but a list is provided of possible situations when parental consent might  
21  
22 199 be waived, such as with legally emancipated adolescents, or under circumstances where  
23  
24 200 obtaining parental consent is not desirable because of the research topic. (3)  
25  
26  
27  
28  
29  
30  
31  
32  
33  
34  
35  
36  
37  
38  
39  
40  
41  
42  
43  
44  
45  
46  
47  
48  
49  
50  
51  
52  
53  
54  
55  
56  
57  
58  
59  
60

209 **Table 1 Summary of selected major guidelines, reports and reviews on ethical**  
 210 **conduction of research in children**

| Guideline                                                      | Core principles                                                                                                                                                                                                                                                                                                                                         | Considerations for adapting to low-resource, low-literary, and minority language settings                                                                                                                                                                                                                                                             |
|----------------------------------------------------------------|---------------------------------------------------------------------------------------------------------------------------------------------------------------------------------------------------------------------------------------------------------------------------------------------------------------------------------------------------------|-------------------------------------------------------------------------------------------------------------------------------------------------------------------------------------------------------------------------------------------------------------------------------------------------------------------------------------------------------|
| World Medical Association, Declaration of Helsinki(7)          | <ul style="list-style-type: none"> <li>• If a research subject is not capable of giving informed consent, it should be sought from a legally authorized representative</li> <li>• When the subject can give assent to decisions about participation in research, assent should be sought in addition to consent. Dissent should be respected</li> </ul> | <ul style="list-style-type: none"> <li>• Special attention should be given to the specific information needs of individual potential subjects as well as to the methods used to deliver the information</li> <li>• Consent should be given preferably in writing, if not the non-written consent must be formally documented and witnessed</li> </ul> |
| Council for International Organizations of Medical Sciences(3) | <ul style="list-style-type: none"> <li>• Obtain permission from a parent or a legally authorized representative of the child</li> <li>• Obtain assent from the child or adolescent according to his or her capacity and after having been provided with information tailored to the child's or adolescent's level of maturity</li> </ul>                | <ul style="list-style-type: none"> <li>• Consult with and engage communities in the informed consent process</li> <li>• Obtained a signed form as evidence of informed consent, justify any exceptions to this general rule and seek approval of the research ethics committee</li> </ul>                                                             |
| Standards for Research (StaR) in Child Health(4)               | <ul style="list-style-type: none"> <li>• Obtain consent and assent when age-appropriate</li> <li>• Provide age-appropriate, clear, concise, and on-going information for parents and children</li> </ul>                                                                                                                                                | <ul style="list-style-type: none"> <li>• Provide clear justification to involve a particular population and equitable sharing of benefits and risks</li> <li>• Community consultation can be helpful but does not replace the need for individual consent</li> <li>• Strengthen composition and expertise of local ethics committees</li> </ul>       |
| National Bioethics Advisory Commission, Ethical and policy     |                                                                                                                                                                                                                                                                                                                                                         | <ul style="list-style-type: none"> <li>• Develop culturally appropriate ways to disclose information that is necessary for adherence to the ethical</li> </ul>                                                                                                                                                                                        |



|                                                               |                                                                                                                                                                                                                                                                                                                                                                          |                                                                                                                                                                                                                                                                                                                                                                                                                                                                                                                                     |
|---------------------------------------------------------------|--------------------------------------------------------------------------------------------------------------------------------------------------------------------------------------------------------------------------------------------------------------------------------------------------------------------------------------------------------------------------|-------------------------------------------------------------------------------------------------------------------------------------------------------------------------------------------------------------------------------------------------------------------------------------------------------------------------------------------------------------------------------------------------------------------------------------------------------------------------------------------------------------------------------------|
| <p>issues in international research(8)</p>                    |                                                                                                                                                                                                                                                                                                                                                                          | <p>standard of informed consent</p> <ul style="list-style-type: none"> <li>• Develop procedures to ensure that participants understand the information provided in the consent process</li> <li>• Respect local requirements of asking permission from community representatives for approaching potential participants, but respect the requirement of individual informed consent</li> <li>• Ethics review committees can waive the requirements of written and signed consent in accordance with local cultural norms</li> </ul> |
| <p>European Council and European Parliament Guidelines(9)</p> | <ul style="list-style-type: none"> <li>• Consent should be sought from parents or legal representatives</li> <li>• Information should be provided to the minor according to its capacity of understanding</li> <li>• The explicit wish of a minor who is capable of forming an opinion and assessing information to refuse participation should be considered</li> </ul> | <ul style="list-style-type: none"> <li>• The individual or legal representative has to give written consent. If the individual is unable to write, oral consent may be given in the presence of at least one witness, as provided for in national legislation</li> </ul>                                                                                                                                                                                                                                                            |

211

**212 Thematic summary of research on consent in LMIC pediatric research**

213

214 Existing published work on informed consent in pediatric research in LMICs consists  
215 largely of case studies describing the experience of individual research teams and  
216 discussing the challenges and solutions utilized when adapting consent processes to their  
217 local context. We summarize several major themes emerging from these studies here and  
218 detail key findings from the reviewed articles in Supplementary Table 1.

219

220 Understanding social norms around decision making and protecting individual autonomy

221 An important principle highlighted in international guidelines on informed consent  
222 in LMICs is appropriate and early engagement with existing local leadership structures  
223 (such as a council of elders) balanced against respect for the autonomy of individual  
224 children or their caregivers.(3,8) In practice, this can be a delicate balance to maintain.  
225 Kongsholm and colleagues, for example, describe consent processes in rural Pakistan,  
226 where family structures are patriarchal and hierarchical. In this setting, consent procedures  
227 involved first seeking consent from an elder, who provided initial consent for the entire  
228 family. However, under this approach, the voluntariness of individual participants may be  
229 undermined, and it is unclear how best to ensure that individuals still retain an “opt out”  
230 mechanism or, conversely, the right to participate in research if they wish to do so but the  
231 elder declines.(13)

232

1  
2  
3 233 Another important consideration explored by some studies is understanding how not all  
4  
5 234 potential consenting caregivers may feel empowered to decline participating in research.  
6  
7 235 Consent procedures administered by local research personnel or by individuals with high  
8  
9 236 social status, such as physicians, may inspire trust.(13,14) However it may also make them  
10  
11 237 reluctant to decline participation, or to resist active participation. For example, in one study  
12  
13 238 in Kenya, explicit refusals to participate were often considered to be impolite. Here  
14  
15 239 researchers found that caregivers expressed their unwillingness to participate by delaying  
16  
17 240 the consent process, or by participating inconsistently in research procedures even after  
18  
19 241 initially having consented to the study.(15)  
20  
21  
22  
23  
24  
25  
26  
27  
28

#### 29 242 30 243 Adapting consent procedures to low-literate settings

31 244 There is strong consensus in international ethics guidelines that written, informed  
32  
33 245 consent is preferred when conducting research. In the case of pediatric research, this again  
34  
35 246 typically involves obtaining written consent from one or both primary caregivers.(4,9,16)  
36  
37 247 However, in many LMIC settings, literacy may be low or a high value may be placed on  
38  
39 248 oral interactions, and lack of alternative consent procedures may violate another core ethics  
40  
41 249 principle, namely the equitable distribution of research benefits and burdens across  
42  
43 250 populations.(3,14,17) Some of the studies we reviewed described these procedures, with  
44  
45 251 verbal consent commonly being obtained, most often in the presence of a literate witness  
46  
47 252 who is able to read available consent documents. (13,14,17,18) In one very thoughtful  
48  
49 253 piece, Kalabuanga and colleagues note, however, that witnesses may often impose their  
50  
51 254 views on the consenting caregiver and their child, rather than encourage dialog and act as a  
52  
53 255 safeguard, especially since they are often recruited in an ad hoc fashion (e.g., other literate  
54  
55  
56  
57  
58  
59  
60

1  
2  
3 256 patients or ancillary hospital staff).(18) Kalabuanga et al. go on to suggest that these  
4  
5 257 challenges may be mitigated by careful vetting and training of independent witnesses or,  
6  
7 258 alternatively, by allowing potential consenting caregivers to use a trusted relative or friend  
8  
9  
10 259 as their witness.(18)

11  
12  
13 260 Another issue identified in the review is that of emerging new mandates in some  
14  
15 261 LMICs to document consent procedures. For example, in India, audiovisual documentation  
16  
17 262 of obtaining informed consent is now required for most clinical trials if participants are  
18  
19 263 low-literate. This introduced significant new logistical challenges and costs related to  
20  
21 264 obtaining and archiving recordings, and it may also pose a barrier to potential research  
22  
23 265 subjects who may distrust or refuse to be recorded.(19)

24  
25  
26  
27 266

28  
29  
30 267 Working in indigenous or less-commonly-spoken languages

31  
32  
33 268 International ethics guidelines emphasize that research information should be  
34  
35 269 provided to consenting caregivers in a local language understandable to the  
36  
37 270 individual.(7,8,16) However, this is most commonly understood to be a working lingua  
38  
39 271 franca, and the issue of and practical approach to provisioning consent processes in an  
40  
41 272 indigenous language is largely unaddressed in LMICs.(20) This is an important  
42  
43 273 consideration, given that a substantial proportion of the potential pediatric research  
44  
45 274 population in LMICs are from populations that speak indigenous or less-commonly-spoken  
46  
47 275 languages.(21) In an interesting review of lessons learned in a pediatric vaccine trial in  
48  
49 276 West Africa, Martellet and colleagues noted challenges in preparing consent procedures in  
50  
51 277 some of the less-common language groups included in the trial, where use of the written  
52  
53  
54  
55  
56  
57  
58  
59  
60

1  
2  
3 278 form was uncommon, where substantial need to rely on metaphor and paraphrase made  
4  
5 279 back-translation difficult, and where written documents were perceived as not being  
6  
7 280 dynamic enough in cultures which valued interactivity and person-to-person exchange.  
8  
9 281 They describe alternative procedures, such as the preparation of recordings of consent  
10  
11 282 scripts in local languages and extensive practice sessions with research staff obtaining  
12  
13 283 consent in local languages.(17) Similarly, another vaccine trial in The Gambia described  
14  
15 284 the successful use of audio-visual Speaking Books in local less-common languages to  
16  
17 285 consent caregivers. (22)  
18  
19  
20  
21  
22  
23  
24

## 25 287 Gender dynamics in caregiver consent

26  
27  
28 288 Local gender dynamics and decision making procedures when consenting male and  
29  
30 289 female caregivers for research is an important consideration. For example, when consenting  
31  
32 290 with caregiving couples or within an extended family unit, instances are discussed where a  
33  
34 291 female caregiver wishes to allow her child to participate, but is unable to do so because her  
35  
36 292 husband or another male authority figure refuses.(13) The opposite may also occur, if a  
37  
38 293 research study is consented by a male figure, but requires significant participatory effort  
39  
40 294 from the primary female for study-related activities, leading the woman to express their  
41  
42 295 refusal through procedural delay or inconsistent participation.(15) Given concerns about  
43  
44 296 gender power imbalance and potential repercussions for consenting female caregivers,  
45  
46 297 some studies discussed working to routinely involve fathers or male authority figures in the  
47  
48 298 consent process for more complex or higher-risk research interventions.(15,23) In one  
49  
50 299 interesting study based in India, Rajaraman and colleagues found that caregivers were  
51  
52 300 more likely to actively participate in the consent process when both were present. They also  
53  
54  
55  
56  
57  
58  
59  
60

1  
2  
3 301 observed, however, that this factor may have been due the fact that most study staff  
4  
5 302 obtaining consent were male, and they call for more research on how the gender of research  
6  
7  
8 303 staff impacts the consent process.(24)  
9

10  
11 304 It is important to note that most discussions of gender dynamics that we reviewed  
12  
13 305 were limited in nuance, tending to focus on instances of overt overriding of female  
14  
15 306 decision-making by male authorities. A broader consideration of the range of ways in  
16  
17 307 which female caregivers communicate, influence, and negotiate decision-making with male  
18  
19 308 family members and other community authorities is an obvious point for future  
20  
21 309 investigation.  
22  
23  
24  
25 310

26  
27  
28 311 Disclosing potential benefits and risks of participation in research  
29  
30

31 312 Participation in some research studies, particularly those with a randomized  
32  
33 313 controlled design or those with differing intervention arms, may not result in direct benefit  
34  
35 314 to all participants. Several studies report difficulties explaining to caregivers that medical  
36  
37 315 research procedures may not result in direct benefit to their children, and in verifying that  
38  
39 316 caregivers comprehended the substance of randomization or control procedures. (25–28)  
40  
41 317 Others noted the need to address issues of information recall and retention, particularly with  
42  
43 318 complex study procedures or consent forms, and to emphasize the right of study withdrawal  
44  
45 319 and the ongoing reaffirmation of consent throughout a study. (26–29) Furthermore, other  
46  
47 320 reports discussed how therapeutic misconception—the perception by research subjects that  
48  
49 321 participation in any component of a multiple-arm, controlled trial, will result in therapeutic  
50  
51  
52  
53  
54  
55  
56  
57  
58  
59  
60

1  
2  
3 322 benefits—might be hard to avoid in certain contexts, as it might be affected by factors like  
4  
5 323 educational level and cultural and religious beliefs about disease.(13,18)  
6  
7

8 324  
9

10  
11 325 At the same time, care must be given to a culturally-appropriate degree of information  
12  
13 326 disclosure. For example, in several studies, caregivers—especially those of higher  
14  
15 327 socioeconomic or educational status—were more likely to participate when provided with  
16  
17 328 detailed and in-depth information about the study processes and given opportunities to ask  
18  
19 329 questions.(12,23,24,30) At the same time, other case studies point out how over-detailed  
20  
21 330 discussion of study procedures or scientific rationale may provoke unneeded reserve or  
22  
23 331 suspicion where such detailed disclosures by health professionals are not culturally  
24  
25 332 customary.(13)  
26  
27  
28  
29

30 333  
31  
32

33 334 Finally, in settings where access to healthcare and other important social goods may be  
34  
35 335 limited, even basic diagnostic or ancillary procedures that occur as part of a research  
36  
37 336 studies may be better than the local standard of care, leading to an undue inducement or  
38  
39 337 highly compelling incentives for caregivers to enroll their children in research, even after  
40  
41 338 being informed about the experimental nature or studies and the risk-benefit  
42  
43 339 balance.(11,13,18) These considerations highlight the importance of considering the socio-  
44  
45 340 economic and cultural background of study settings well before beginning research and  
46  
47 341 making plans to incorporate appropriate early, equitable benefit-sharing measures when  
48  
49 342 possible, such as using study resources to improve community-level care not just care for  
50  
51 343 eligible trial participants.(18)  
52  
53  
54  
55  
56  
57  
58  
59  
60

344

345 Adolescents

346

347 Adolescents constitute a special population with vulnerabilities different from those  
348 of adults and younger children, and they should be included in research that addresses their  
349 specific needs. However, as legal minors they often cannot give informed consent for  
350 research.(16) In research in LMICs, regulations vary significantly from country to country  
351 regarding when adolescents can provide legal consent for research.(31) For example, even  
352 when legal frameworks allow adolescents to seek, for example, contraception services  
353 without parental permission, they cannot necessarily provide consent for research on that  
354 theme.(32,33) In a scoping review of post abortion care research, Zulu and coauthors  
355 discuss how the need to balance adolescents' privacy needs and the demand for parental  
356 consent poses difficulties for researchers in this field.(34) Woollett and colleagues describe  
357 an interesting case study where they sought consent from a High Court in South Africa for  
358 research involving orphaned HIV-positive adolescents. In that study, they provide detailed  
359 recommendations for consent involving adolescents, including training staff about  
360 confidentiality requirements; recognizing immature decision-making by adolescents and  
361 developing appropriate methods for probing comprehension and consent, and utilizing  
362 methods that promote active participation in research, such as mobile phones.(33)

363

364 Assent



1  
2  
3 365 Pediatric research guidelines are unanimous on the need to obtain age-appropriate  
4  
5 366 assent from children and adolescents who do not provide their own informed consent  
6  
7 367 (Table 1). However, we found little explicit discussion or description of procedures for  
8  
9 368 obtaining assent in the research reports we reviewed. (35,36) One interesting qualitative  
10  
11 369 study on parental perceptions of assent in Jordan revealed considerable variability in  
12  
13 370 caregivers' perspectives about at what age assent should be solicited or, even, if assent  
14  
15 371 should in all cases be obtained and dissent respected.(23)  
16  
17  
18  
19

20 372  
21 373 **DISCUSSION**  
22 374

23 375 Children in low-resource settings are highly vulnerable to exploitation in research, because  
24  
25 376 of circumstances including socioeconomic inequalities, limited access to health care, and  
26  
27 377 high burden of illness.(60) In addition, even where international consensus exists around  
28  
29 378 core ethical principles for providing protections to children as research subjects, it may be  
30  
31 379 unclear how best to operationalize those principles in many low-resources settings, where  
32  
33 380 gender norms, literacy, unfamiliarity with scientific research, and language barriers may all  
34  
35 381 be important adaptive barriers. (10,11)  
36  
37  
38  
39

40 382  
41  
42  
43 383 Through a scoping review of research reports and case studies from LMICs we identified,  
44  
45 384 however, several core areas where existing research reports provided considerable insight  
46  
47 385 and operational guidance which could be used to guide informed consent design processes  
48  
49 386 in additional LMIC settings. These included: (1) *careful consideration of community*  
50  
51 387 *hierarchy*, where consent for research may first proceed through a council of elders or other  
52  
53 388 authority figure, prior to approaching individual caregivers; (2) *guidance on developing*  
54  
55  
56  
57  
58  
59  
60

1  
2  
3 389 *verbal consent procedures* in settings where caregivers have low literacy levels; (3) and  
4  
5 390 *recognition of the challenges of consent in indigenous or less-commonly spoken languages,*  
6  
7 391 particularly when that language is not commonly written and where alternative procedures,  
8  
9  
10 392 such as audio recordings in the language, must be employed; and (4) *careful consideration*  
11  
12 393 *of the possibility of therapeutic misconception* and of developing consent procedures that  
13  
14 394 ensure caregivers' comprehension of the potential benefits (or lack thereof) and risks of  
15  
16 395 research procedures for their children.  
17  
18  
19  
20 396

21  
22  
23 397 However, within these four broad thematic areas, we also noted the need for additional  
24  
25 398 careful investigation. In particular, there is considerable uncertainty on how to ensure the  
26  
27 399 principle of subsequent individual informed consent when community leaders or other  
28  
29 400 authorities are approached first. This is especially the case when gender power imbalance is  
30  
31 401 at play, and female caregivers may be either unempowered to consent or to opt out of a  
32  
33 402 research decision made by a male authority. In addition, the social status of individuals  
34  
35 403 administering or witnessing consent procedures may unduly influence the decision-making  
36  
37 404 of caregivers, and research is needed to better understand and accommodate for the  
38  
39 405 interpersonal dynamics of obtaining consent.  
40  
41  
42  
43  
44 406

45  
46  
47 407 Finally, two thematic topics seem to be particularly underrepresented in the literature on  
48  
49 408 pediatric LMIC research, and more work is urgently needed. First, despite extensive  
50  
51 409 discussions about the difficulties of conducting research with adolescents, we found only  
52  
53 410 few studies with practical discussions or guidance on how to navigate these difficulties.  
54  
55  
56  
57  
58  
59  
60

1  
2  
3 411 More investigation of the ethical conduct of research with adolescents is needed, with a  
4  
5 412 broader representation of health conditions, research designs, and geographic regions.  
6  
7 413 Second, despite strong representation of the principle of assent in international guidelines  
8  
9 414 on research with children and adolescents, we found little research of cultural and regional  
10  
11 415 differences around notions of assent and virtually no discussion of the mechanics of  
12  
13 416 assessing assent in research studies. Additional research into the topic of assent for research  
14  
15 417 among children in LMICs should be an important priority.  
16  
17  
18  
19  
20 418

21  
22  
23 419 Our review has two important limitations that must be considered. First, we included only  
24  
25 420 articles published in English in major indexing databases. We believe this approach is  
26  
27 421 justified, given our desire to provide a high-level overview of the topic without focusing  
28  
29 422 specifically on any geographic region. Nevertheless, our review has undoubtedly missed  
30  
31 423 resources in other languages or within the grey literature, which could be taken up in more  
32  
33 424 detailed region-specific work on this topic. Second, given the diversity and heterogeneity of  
34  
35 425 the literature reviewed, it was not possible to detail many of the practical insights and tips  
36  
37 426 given in the individual articles. Nevertheless, given the annotation and thematic  
38  
39 427 organization provided in Supplementary Table 1, we are confident that readers will be able  
40  
41 428 to identify areas of particular interest for more in-depth examination.  
42  
43  
44  
45  
46  
47  
48  
49  
50  
51  
52  
53  
54  
55  
56  
57  
58  
59  
60

1  
2  
3  
4  
5  
6  
7  
8  
9  
10  
11  
12  
13  
14  
15  
16  
17  
18  
19  
20  
21  
22  
23  
24  
25  
26  
27  
28  
29  
30  
31  
32  
33  
34  
35  
36  
37  
38  
39  
40  
41  
42  
43  
44  
45  
46  
47  
48  
49  
50  
51  
52  
53  
54  
55  
56  
57  
58  
59  
60

429 **ABBREVIATIONS**

- 430 IRB: Institutional review board
- 431 LMIC: Low and middle-income country
- 432 RCT: Randomized clinical trial
- 433 STaR: Standards for Research in Child Health

Confidential: For Review Only

1  
2  
3 434 **FUNDING**  
4  
5

6 435 This work was unfunded.  
7  
8

9 436  
10  
11  
12  
13  
14  
15  
16  
17  
18  
19  
20  
21  
22  
23  
24  
25  
26  
27  
28  
29  
30  
31  
32  
33  
34  
35  
36  
37  
38  
39  
40  
41  
42  
43  
44  
45  
46  
47  
48  
49  
50  
51  
52  
53  
54  
55  
56  
57  
58  
59  
60

Confidential: For Review Only

1  
2  
3  
4  
5  
6  
7  
8  
9  
10  
11  
12  
13  
14  
15  
16  
17  
18  
19  
20  
21  
22  
23  
24  
25  
26  
27  
28  
29  
30  
31  
32  
33  
34  
35  
36  
37  
38  
39  
40  
41  
42  
43  
44  
45  
46  
47  
48  
49  
50  
51  
52  
53  
54  
55  
56  
57  
58  
59  
60

437 **COMPETING INTERESTS**

438 None.

439

Confidential: For Review Only

1  
2  
3 440 **AUTHOR'S CONTRIBUTIONS**  
4  
5

6 441 MC designed the search strategy, extracted data from articles, and wrote the first draft of  
7  
8 442 the manuscript. PR conceived the study, reviewed abstracts, and revised the manuscript.  
9

10  
11 443  
12

13  
14 444  
15  
16  
17  
18  
19  
20  
21  
22  
23  
24  
25  
26  
27  
28  
29  
30  
31  
32  
33  
34  
35  
36  
37  
38  
39  
40  
41  
42  
43  
44  
45  
46  
47  
48  
49  
50  
51  
52  
53  
54  
55  
56  
57  
58  
59  
60

Confidential: For Review Only

1  
2  
3  
4  
5  
6  
7  
8  
9  
10  
11  
12  
13  
14  
15  
16  
17  
18  
19  
20  
21  
22  
23  
24  
25  
26  
27  
28  
29  
30  
31  
32  
33  
34  
35  
36  
37  
38  
39  
40  
41  
42  
43  
44  
45  
46  
47  
48  
49  
50  
51  
52  
53  
54  
55  
56  
57  
58  
59  
60

445 **DATA SHARING STATEMENT**

446 Not applicable

447

Confidential: For Review Only



1  
2  
3 448 **ACKNOWLEDGMENTS**  
4

5 449 We thank research subjects and clinical staff at Maya Health Alliance for inspiring our  
6  
7 450 interest in this important topic.  
8  
9

10 451  
11  
12  
13  
14  
15  
16  
17  
18  
19  
20  
21  
22  
23  
24  
25  
26  
27  
28  
29  
30  
31  
32  
33  
34  
35  
36  
37  
38  
39  
40  
41  
42  
43  
44  
45  
46  
47  
48  
49  
50  
51  
52  
53  
54  
55  
56  
57  
58  
59  
60

Confidential: For Review Only

1  
2  
3  
4  
5  
6  
7  
8  
9  
10  
11  
12  
13  
14  
15  
16  
17  
18  
19  
20  
21  
22  
23  
24  
25  
26  
27  
28  
29  
30  
31  
32  
33  
34  
35  
36  
37  
38  
39  
40  
41  
42  
43  
44  
45  
46  
47  
48  
49  
50  
51  
52  
53  
54  
55  
56  
57  
58  
59  
60

452 **FIGURE LEGENDS**

453 **Figure 1. Results of Literature Screen.** Flow diagram depicting results of the literature  
454 search and review procedure.

455  
456  
457

Confidential: For Review Only

458 **REFERENCES**

- 459 1. Weindling P. The Origins of Informed Consent: The International Scientific  
460 Commission on Medical War Crimes, and the Nuremberg Code. *Bull Hist Med.*  
461 2001;75(1):37–71.
- 462 2. Rickham P. Human Experimentation. Code of Ethics of the World Medical  
463 Association. Declaration of Helsinki. *Br Med J.* 1964;2 (5402)(177).
- 464 3. Council for International Organizations of Medical Sciences (CIOMS). International  
465 Ethical Guidelines for Health-related Research Involving Humans, Fourth Edition.  
466 [Internet]. 2016. Available from:  
467 [http://www.sciencedirect.com/science/article/B6VC6-45F5X02-](http://www.sciencedirect.com/science/article/B6VC6-45F5X02-9C/2/e44bc37a6e392634b1cf436105978f01)  
468 [9C/2/e44bc37a6e392634b1cf436105978f01](http://www.sciencedirect.com/science/article/B6VC6-45F5X02-9C/2/e44bc37a6e392634b1cf436105978f01)
- 469 4. Caldwell PHY, Dans L, Newman J, Sammons H, Spriggs M, Tambe P, et al. StaR  
470 Child Health Standard 1 : Consent and Recruitment. *Pediatrics.* 2012.
- 471 5. Klassen TP, Hartling L, Hamm M, van der Lee JH, Ursum J, Offringa M. StaR Child  
472 Health: an initiative for RCTs in children. *Lancet* [Internet]. 2009 Oct  
473 17;374(9698):1310–2. Available from: [http://dx.doi.org/10.1016/S0140-](http://dx.doi.org/10.1016/S0140-6736(09)61803-1)  
474 [6736\(09\)61803-1](http://dx.doi.org/10.1016/S0140-6736(09)61803-1)
- 475 6. Martinez B, Webb MF, Gonzalez A, Douglas K, Grazioso P, Rohloff P, et al.  
476 Complementary feeding intervention on stunted Guatemalan children : a randomised  
477 controlled trial. *BMJ Paediatr Open.* 2018;1–8.
- 478 7. World Medical Association. WMA Declaration of Helsinki - Ethical Principles for  
479 Medical Research Invol...: . 2017;(June 1964):1–9. Available from:

- 1  
2  
3 480 <http://eds.b.ebscohost.com/eds/pdfviewer/pdfviewer?sid=a4bced6b-7270-457a->  
4  
5 481 [9730-e5a47e439a7a%40sessionmgr105&vid=6&hid=126](http://eds.b.ebscohost.com/eds/pdfviewer/pdfviewer?sid=a4bced6b-7270-457a-9730-e5a47e439a7a%40sessionmgr105&vid=6&hid=126)  
6  
7  
8 482 8. National Bioethics Advisory Commission. Ethical and Policy Issues Research:  
9  
10 483 Clinical Trials in Developing Countries Vol. 1 [Internet]. 2001. 59 p. Available  
11  
12 484 from: <http://bioethics.georgetown.edu/nbac/clinical/Vol1.pdf>  
13  
14  
15  
16 485 9. European Commission. EU Directive 2001/20/EC. Off J Eur Communities.  
17  
18 486 2001;2001(April):1–15.  
19  
20  
21 487 10. Bhutta ZA. Beyond informed consent. Bull World Health Organ. 2004  
22  
23 488 Oct;82(10):771–7.  
24  
25  
26 489 11. MacLeod SM, Knoppert DC, Stanton-Jean M, Avarad D. Pediatric clinical drug trials  
27  
28 490 in low-income countries: key ethical issues. Paediatr Drugs. 2015 Feb;17(1):83–90.  
29  
30  
31 491 12. Minnies D, Hawkrigde T, Hanekom W, Ehrlich R, London L, Hussey G. Evaluation  
32  
33 492 of the quality of informed consent in a vaccine field trial in a developing country  
34  
35 493 setting. BMC Med Ethics. 2008;9:1–9.  
36  
37  
38  
39 494 13. Halmsted Kongsholm NC, Lassen J, Sandoe P. “I didn’t have anything to decide, I  
40  
41 495 wanted to help my kids” - An interview-based study of consent procedures for  
42  
43 496 sampling human biological material for genetic research in rural Pakistan. AJOB  
44  
45 497 Empir Bioeth. 2018;4515(April 2014):1–35.  
46  
47  
48  
49 498 14. Nabulsi M, Khalil Y, Makhoul J. Parental attitudes towards and perceptions of their  
50  
51 499 children’s participation in clinical research: A developing-country perspective. J  
52  
53 500 Med Ethics. 2011;37(7):420–3.  
54  
55  
56  
57  
58  
59  
60

- 1  
2  
3 501 15. Kamuya DM, Theobald SJ, Marsh V, Parker M, Geissler WP, Molyneux SC. “The  
4  
5 502 one who chases you away does not tell you go”: silent refusals and complex power  
6  
7 503 relations in research consent processes in Coastal Kenya. PLoS One.  
8  
9  
10 504 2015;10(5):e0126671.  
11  
12  
13 505 16. Macrae DJ. The Council for International Organizations and Medical Sciences  
14  
15 506 (CIOMS) guidelines on ethics of clinical trials. Proc Am Thorac Soc. 2007  
16  
17 507 May;4(2):176–8, discussion 178-9.  
18  
19  
20 508 17. Martellet L, Sow SO, Diallo A, Hodgson A, Kampmann B, Hirve S, et al. Ethical  
21  
22 509 Challenges and Lessons Learned During the Clinical Development of a Group A  
23  
24 510 Meningococcal Conjugate Vaccine. Clin Infect Dis. 2015 Nov;61 Suppl 5:S422-7.  
25  
26  
27  
28 511 18. Kalabuanga M, Ravinetto R, Maketa V, Muhindo Mavoko H, Fungula B, Inocência  
29  
30 512 da Luz R, et al. The Challenges of Research Informed Consent in Socio-  
31  
32 513 Economically Vulnerable Populations: A Viewpoint From the Democratic Republic  
33  
34 514 of Congo. Dev World Bioeth. 2016;16(2):64–9.  
35  
36  
37  
38 515 19. Shetty P, Maurya M, Figer B, Thatte U, Gogtay N. Audiovisual recording of the  
39  
40 516 consenting process in clinical research: Experiences from a tertiary referral center.  
41  
42 517 Perspect Clin Res [Internet]. 2018 Jan 1;9(1):44–7. Available from:  
43  
44 518 <http://www.picronline.org/article.asp?issn=2229-3485>  
45  
46  
47  
48 519 20. Fitzpatrick EFM, Martiniuk ALC, D’Antoine H, Oscar J, Carter M, Elliott EJ.  
49  
50 520 Seeking consent for research with indigenous communities: a systematic review.  
51  
52 521 BMC Med Ethics. 2016 Oct;17(1):65.  
53  
54  
55 522 21. Flood D, Rohloff P. Indigenous languages and global health. Lancet Glob Heal

- 1  
2  
3 523 [Internet]. 2018;6(2):e134–5. Available from: <http://dx.doi.org/10.1016/S2214->  
4  
5 524 109X(17)30493-X  
6  
7  
8 525 22. Mboizi RB, Afolabi MO, Okoye M, Kampmann B, Roca A, Idoko OT. Recall and  
9  
10 526 decay of consent information among parents of infants participating in a randomized  
11  
12 527 controlled clinical trial using an audio-visual tool in The Gambia. *Hum Vaccin*  
13  
14  
15 528 *Immunother.* 2017 Sep;13(9):2185–91.  
16  
17  
18 529 23. Khabour OF, Alomari MA, Al-Sheyab NA. Parental Perceptions About Informed  
19  
20 530 Consent/Assent in Pediatric Research in Jordan. *J Empir Res Hum Res Ethics.* 2017  
21  
22 531 Oct;12(4):261–8.  
23  
24  
25 532 24. Rajaraman D, Jesuraj N, Geiter L, Bennett S, Grewal HM, Vaz M. How  
26  
27 533 participatory is parental consent in low literacy rural settings in low income  
28  
29 534 countries? Lessons learned from a community based study of infants in South India.  
30  
31 535 *BMC Med Ethics.* 2011 Feb;12:3.  
32  
33  
34  
35 536 25. Leach A, Hilton S, Greenwood BM, Manneh E, Dibba B, Wilkins A, et al. An  
36  
37 537 evaluation of the informed consent procedure used during a trial of a *Haemophilus*  
38  
39 538 *influenzae* type B conjugate vaccine undertaken in The Gambia, West Africa. *Soc*  
40  
41 539 *Sci Med.* 1999;48(2):139–48.  
42  
43  
44  
45 540 26. Pace C, Talisuna A, Wendler D, Maiso F, Wabwire-Mangen F, Bakyaite N, et al.  
46  
47 541 Quality of parental consent in a Ugandan malaria study. *Am J Public Health.*  
48  
49 542 2005;95(7):1184–9.  
50  
51  
52  
53 543 27. Paré Toe L, Ravinetto RM, Dierickx S, Gryseels C, Tinto H, Rouamba N, et al.  
54  
55 544 Could the decision of trial participation precede the informed consent process?  
56  
57  
58  
59  
60

- 1  
2  
3 545 Evidence from Burkina Faso. *PLoS One*. 2013;8(11):1–10.  
4  
5  
6 546 28. Angwenyi V, Kamuya D, Mwachiro D, Kalama B, Marsh V, Njuguna P, et al.  
7  
8 547 Complex realities: community engagement for a paediatric randomized controlled  
9  
10 548 malaria vaccine trial in Kilifi, Kenya. *Trials*. 2014 Feb;15:65.  
11  
12  
13 549 29. Sarkar R, Grandin EW, Gladstone BP, Muliyl J, Kang G. Comprehension and recall  
14  
15 550 of informed consent among participating families in a birth cohort study on  
16  
17 551 diarrhoeal disease. *Public Health Ethics*. 2009;2(1):37–44.  
18  
19  
20  
21 552 30. Serce O, Gonen I, Bakir M. Factors Influencing Parental Consent in a Hypothetical  
22  
23 553 Pediatric Vaccine Trial in a Developing Country Setting: A Questionnaire Study.  
24  
25 554 Account Res [Internet]. 2015;22(1):1–13. Available from:  
26  
27 555 <http://dx.doi.org/10.1080/08989621.2014.882779>  
28  
29  
30  
31 556 31. Bekker L, Slack C, Lee S, Shah S, Kapogiannis B. Ethical Issues in Adolescent HIV  
32  
33 557 Research in Resource-Limited Countries. *J Acquir Immune Defic Syndr*.  
34  
35 558 2014;65(Supplement 1):24–8.  
36  
37  
38 559 32. McClure CA, Gray G, Rybczyk GK, Wright PF. Challenges to conducting HIV  
39  
40 560 preventative vaccine trials with adolescents. *J Acquir Immune Defic Syndr*. 2004  
41  
42 561 Jun;36(2):726–33.  
43  
44  
45  
46 562 33. Woollett N, Psychology MA, Th A, Peter J, Cluver L, Brahmbhatt H. Enrolling  
47  
48 563 HIV-positive adolescents in mental health research : A case study re flecting on  
49  
50 564 legal and ethical complexities. 2017;107(8):679–83.  
51  
52  
53  
54 565 34. Zulu JM, Ali J, Hallez K, Kass N, Michelo C, Hyder AA. Ethics challenges and  
55  
56 566 guidance related to research involving adolescent post-abortion care: A scoping  
57  
58  
59  
60

- 1  
2  
3 567 review. *Reprod Health*. 2018;15(1):1–10.  
4  
5  
6 568 35. Vreeman RC, Nyandiko WM, Meslin EM. Pediatric Assent for a Study of  
7  
8 569 Antiretroviral Therapy Dosing for Children in Western Kenya: A Case Study in  
9  
10 570 International Research Collaboration. *J Empir Res Hum Res Ethics* [Internet].  
11  
12 571 2009;4(1):3–16. Available from: <http://www.jstor.org/stable/10.1525/jer.2009.4.1.3>  
13  
14  
15  
16 572 36. Molyneux CS, Wassenaar DR, Peshu N, Marsh K. “Even if they ask you to stand by  
17  
18 573 a tree all day, you will have to do it (laughter)...!”: Community voices on the notion  
19  
20 574 and practice of informed consent for biomedical research in developing countries.  
21  
22 575 *Soc Sci Med*. 2005;61(2):443–54.  
23  
24  
25  
26 576 37. Ott MA, Crawley FP, Saez-Llorens X, Owusu-Agyei S, Neubauer D, Dubin G, et al.  
27  
28 577 Ethical Considerations for the Participation of Children of Minor Parents in Clinical  
29  
30 578 Trials. *Paediatr Drugs*. 2018 Jun;20(3):215–22.  
31  
32  
33 579 38. Regmi PR, Aryal N, Kurmi O, Pant PR, van Teijlingen E, Wasti SP. Informed  
34  
35 580 Consent in Health Research: Challenges and Barriers in Low-and Middle-Income  
36  
37 581 Countries with Specific Reference to Nepal. *Dev World Bioeth*. 2017;17(2):84–9.  
38  
39  
40  
41 582 39. Mandava A, Pace C, Campbell B, Emanuel E. The quality of informed consent:  
42  
43 583 mapping the landscape. A review of empirical data from developing and developed  
44  
45 584 countries. *J Med Ethics*. 2016;38(6):356–65.  
46  
47  
48 585 40. Joseph PD, Caldwell PHY, Tong A. Stakeholder Views of Clinical Trials in Low-  
49  
50 586 and Middle-Income Countries : A Systematic Review. 2016;137(2).  
51  
52  
53  
54 587 41. Morrow BM, Argent AC, Kling S. Informed consent in paediatric critical care  
55  
56 588 research--a South African perspective. *BMC Med Ethics*. 2015 Sep;16:62.  
57  
58  
59  
60



- 1  
2  
3 589 42. Swain TR. Clinical trials for children: some concerns. *Indian J Pharmacol* [Internet].  
4  
5 590 2014;46(2):145–6. Available from:  
6  
7 591 <http://ovidsp.ovid.com/ovidweb.cgi?T=JS&PAGE=reference&D=medl&NEWS=N>  
8  
9 &AN=24741182  
10 592
- 11  
12 593 43. Ruiz-Casares M. Research ethics in global mental health: Advancing culturally  
13  
14 responsive mental health research. *Transcult Psychiatry*. 2014;51(6):790–805.  
15 594
- 16  
17 595 44. Offringa M, Needham AC, Chan WWY. StaR Child Health: Improving global  
18  
19 standards for child health research. *Early Hum Dev* [Internet]. 2013;89(11):861–4.  
20 596  
21 Available from: <http://dx.doi.org/10.1016/j.earlhumdev.2013.09.011>  
22 597
- 23  
24 598 45. Daley TC, Singhal N, Krishnamurthy V. Ethical considerations in conducting  
25  
26 research on autism spectrum disorders in low and middle income countries. *J Autism*  
27 599  
28 *Dev Disord*. 2013;43(9):2002–14.  
29 600
- 30  
31 601 46. Denburg AE, Joffe S, Gupta S, Howard SC, Ribeiro RC, Antillon FA, et al. Pediatric  
32  
33 oncology research in low income countries: ethical concepts and challenges. *Pediatr*  
34 602  
35 *Blood Cancer*. 2012 Apr;58(4):492–7.  
36 603
- 37  
38 604 47. Mystakidou K, Panagiotou I, Katsaragakis S, Tsilika E, Parpa. Ethical and practical  
39  
40 challenges of implementing informed consent in HIV/AIDS clinical trials in  
41 605  
42 developing or resource-limited countries. *J Soc Asp HIV/AIDS*. 2009;6(2):46–57.  
43 606  
44  
45 607 48. Embleton L, Ott MA, Wachira J, Naanyu V, Kamanda A, Makori D, et al. Adapting  
46  
47 ethical guidelines for adolescent health research to street-connected children and  
48 608  
49 youth in low- and middle-income countries: A case study from western Kenya. *BMC*  
50 609  
51 *Med Ethics*. 2015;  
52 610

- 1  
2  
3 611 49. Millum J, Emanuel E. The Ethics of International Research with Abandoned  
4  
5 612 Children. 2015;35(1):30–7.  
6  
7  
8 613 50. Vreeman R, Kamaara E, Kamanda A, Ayuku D, Nyandiko W, Atwoli L, et al.  
9  
10 614 Community Perspectives on Research Consent Involving Vulnerable Children in  
11  
12 615 Western Kenya. *J Empir Res Hum Res Ethics* [Internet]. 2012;7(4):44–55. Available  
13  
14 616 from: <http://journals.sagepub.com/doi/10.1525/jer.2012.7.4.44>  
15  
16  
17  
18 617 51. Tindana P, Bull S, Amenga-Etego L, De Vries J, Aborigo R, Koram K, et al.  
19  
20 618 Seeking consent to genetic and genomic research in a rural Ghanaian setting: A  
21  
22 619 qualitative study of the MalariaGEN experience. *BMC Med Ethics* [Internet].  
23  
24 620 2012;13(1):1. Available from: BMC Medical Ethics  
25  
26  
27  
28 621 52. Morris MC, Wilson PT. Medical Device Research in Resource-Poor Settings: A  
29  
30 622 Pediatric Case Study in Ghana. *IRB Ethics Hum Res*. 2018;36(4):1–7.  
31  
32  
33 623 53. Ward CL, Shaw D, Anane-Sarpong E, Sankoh O, Tanner M, Elger B. The Ethics of  
34  
35 624 Health Care Delivery in a Pediatric Malaria Vaccine Trial: The Perspectives of  
36  
37 625 Stakeholders From Ghana and Tanzania. *J Empir Res Hum Res Ethics*.  
38  
39 626 2018;13(1):26–41.  
40  
41  
42  
43 627 54. Devries KM, Child JC, Elbourne D, Naker D, Heise L. “I never expected that it  
44  
45 628 would happen, coming to ask me such questions”: Ethical aspects of asking children  
46  
47 629 about violence in resource poor settings. *Trials*. 2015 Nov;16:516.  
48  
49  
50  
51 630 55. Oduro AR, Aborigo RA, Amugsi D, Anto F, Anyorigiya T, Atuguba F, et al.  
52  
53 631 Understanding and retention of the informed consent process among parents in rural  
54  
55 632 northern Ghana. *BMC Med Ethics*. 2008;9:1–9.  
56  
57  
58  
59  
60

- 1  
2  
3 633 56. Krosin MT, Klitzman R, Levin B, Cheng J, Ranney ML. Problems in comprehension  
4  
5 634 of informed consent in rural and peri-urban Mali, West Africa. *Clin Trials*.  
6  
7 635 2006;3(3):306–13.  
8  
9  
10 636 57. Molyneux CS, Peshu N, Marsh K. Trust and informed consent: Insights from  
11  
12 637 community members on the Kenyan coast. *Soc Sci Med*. 2005;61(7):1463–73.  
13  
14  
15 638 58. Joseph PD, Craig JC, Tong A, Caldwell PHY. Researchers, Regulators, and  
16  
17 639 Sponsors Views on Pediatric Clinical Trials: A Multinational Study. *Pediatrics*  
18  
19 640 [Internet]. 2016;138(4):e20161171–e20161171. Available from:  
20  
21 641 <http://pediatrics.aappublications.org/cgi/doi/10.1542/peds.2016-1171>  
22  
23  
24  
25 642 59. Nakkash R, Makhoul J, Afifi R. Obtaining informed consent: observations from  
26  
27 643 community research with refugee and impoverished youth. *J Med Ethics*. 2009  
28  
29 644 Oct;35(10):638–43.  
30  
31  
32  
33 645 60. Initiative for Vaccine Research of the Department of Vaccines and Biologicals World  
34  
35 646 Health Organization. Ethical considerations arising from vaccine trials conducted in  
36  
37 647 paediatric populations with high disease burden in developing countries. In:  
38  
39 648 WHO/IRV ethics meeting November 26-28, 2002 Accra, Ghana [Internet]. 2002.  
40  
41 649 Available from: [www.who.int/vaccines-documents](http://www.who.int/vaccines-documents)  
42  
43  
44  
45  
46 650

1  
2  
3  
4  
5  
6  
7  
8  
9  
10  
11  
12  
13  
14  
15  
16  
17  
18  
19  
20  
21  
22  
23  
24  
25  
26  
27  
28  
29  
30  
31  
32  
33  
34  
35  
36  
37  
38  
39  
40  
41  
42  
43  
44  
45  
46  
47  
48  
49  
50  
51  
52  
53  
54  
55  
56  
57  
58  
59  
60

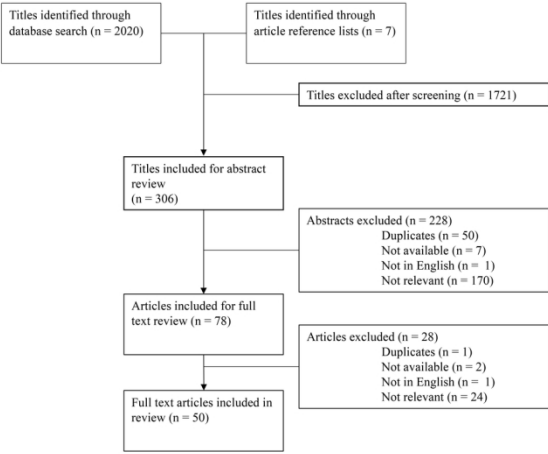

152x85mm (300 x 300 DPI)

**Supplementary Table 1. Summary of articles selected for inclusion in review.**

Confidential: For Review Only

| Reference (Year)                                | Study Description                                                                   | Study Location                 | Major findings                                                                                                                                                                                                                                                                                                                                                                                                                                                                                                                                                                                      |
|-------------------------------------------------|-------------------------------------------------------------------------------------|--------------------------------|-----------------------------------------------------------------------------------------------------------------------------------------------------------------------------------------------------------------------------------------------------------------------------------------------------------------------------------------------------------------------------------------------------------------------------------------------------------------------------------------------------------------------------------------------------------------------------------------------------|
| <b>Reviews and Opinion Articles<sup>1</sup></b> |                                                                                     |                                |                                                                                                                                                                                                                                                                                                                                                                                                                                                                                                                                                                                                     |
| Ott MA et al.(37)<br>(2018)                     | Review – participation of children of minor parents in research                     | Multiple                       | Discussion on international research documents and existing laws and practices regarding consent for research for children of minor parents. Few countries have regulations about the subject, which might result in exclusion of those children from research. Authors recommend involving minors in the decision-making about their children and adapting consent procedures so minor parents can participate and their children's vulnerabilities correctly addressed.                                                                                                                           |
| Zulu JM et al. (34)<br>(2018)                   | Review - Ethical challenges of post-abortion care research in adolescents in LMICs  | Multiple                       | Authors included 14 articles in their analysis. Regarding the consent process, challenges identified include difficulties in seeking consent from parents/guardians of adolescents who are below the consent age, vulnerability of adolescents compromising ability to make decisions, fear of losing access to health care affecting informed consent process, and inadequate guidance on how and when to involve communities in the consent process.                                                                                                                                              |
| Regmi P et al. (38)<br>(2017)                   | Review – informed consent in health research in LMICs                               | Multiple, but focused on Nepal | Authors discuss challenges in adapting informed consent: verbal versus written informed consent in areas of limited literacy; difficulties posed by having to translate consent documents to local languages; issues around the legal age to consent, and how clear threshold ages of consent are not clear in local guidelines.                                                                                                                                                                                                                                                                    |
| Mandava A et al. (39)<br>(2016)                 | Review – comparison between consent processes in developing and developed countries | Multiple                       | Authors aimed to compare data about comprehension and voluntariness. In both settings comprehension of study information varies among participants, and comprehension of randomization and placebo use is poor. Participants in developing countries seem to be less likely to say they can refuse participation or withdraw and worry more about the consequences of doing so. Recommendations include developing validated questions to measure comprehension and voluntariness and conducting studies on the impact of cultural norms and socio-demographic characteristics on informed consent. |

|                               |                                                                                                       |              |                                                                                                                                                                                                                                                                                                                                                                                                                                                                                                                                |
|-------------------------------|-------------------------------------------------------------------------------------------------------|--------------|--------------------------------------------------------------------------------------------------------------------------------------------------------------------------------------------------------------------------------------------------------------------------------------------------------------------------------------------------------------------------------------------------------------------------------------------------------------------------------------------------------------------------------|
| Joseph P et al. (40) (2016)   | Review - Views of stakeholders on aspects of conducting research with children in LMICs               | Multiple     | Regarding informed consent, stakeholders believe that disempowerment, poor education, and difficulty in translating scientific concepts were barriers to informed decision making. Authors recommend simplifying consent forms and presenting them in culturally and linguistically appropriate format with verification of parental comprehension. Authors discuss that Western ethical principles of consent and child assent, autonomy, and individualism need to be contextualized.                                        |
| Morrow B et al. (41) (2015)   | Opinion – Consent for pediatric critical care research in South Africa                                | South Africa | Authors discuss legal issues in South Africa that create confusion for informed consent for children. They identify barriers to the consent process: impracticability of getting consent when urgent action is needed; the validity of consent in high-stress settings; addressing parents during stressful situations; sociocultural issues and the differences in communication and response to authority figures. The authors discuss alternatives to the prospective informed consent, such as the deferred consent model. |
| MacLeod SM et al. (11) (2015) | Review – ethical issues of pediatric drug trials in LMICs                                             | Multiple     | The review discusses vulnerabilities of pediatric research participants, in particular children in LMICs. Authors discuss characteristics of the consent process, and how socioeconomic status, religious belief, and distribution of power affect decisions to participate. They point to the need to consider cultural differences, and the appropriateness of obtaining community consent in some contexts.                                                                                                                 |
| Swain T. (42) (2014)          | Opinion - barriers to pediatric clinical drug trials in low resource settings, with emphasis in India | India        | The author discusses how the consent process for research can be affected by poverty and lack of education. The author points out that the consent process should be clear and assent should be sought from children 7-18 years old, as per Indian guidelines. Deferred consent for neonatal intensive care studies and other high-acuity settings may reduce caregiver stress and be preferred.                                                                                                                               |
| Bekker L et al. (31) (2014)   | Review - Ethical issues of HIV research in resource limited countries                                 | Multiple     | The authors review ethical issues in HIV research with adolescents in LMICs. They point out best practices for consenting adolescents: auditing ethical-legal requirements for consent; involving adolescents in decision making; ensuring                                                                                                                                                                                                                                                                                     |

1  
2  
3  
4  
5  
6  
7  
8  
9  
10  
11  
12  
13  
14  
15  
16  
17  
18  
19  
20  
21  
22  
23  
24  
25  
26  
27  
28  
29  
30  
31  
32  
33  
34  
35  
36  
37  
38  
39  
40  
41  
42  
43  
44  
45  
46  
47  
48  
49  
50  
51  
52  
53  
54  
55  
56  
57  
58  
59  
60

|  |  |  |                                                                                                   |
|--|--|--|---------------------------------------------------------------------------------------------------|
|  |  |  | language, age, and cultural appropriateness; and giving sufficient time and resources to consent. |
|--|--|--|---------------------------------------------------------------------------------------------------|

Confidential: For Review Only



|                                   |                                                                                                                                                       |          |                                                                                                                                                                                                                                                                                                                                                                                                                                                                                                                                   |
|-----------------------------------|-------------------------------------------------------------------------------------------------------------------------------------------------------|----------|-----------------------------------------------------------------------------------------------------------------------------------------------------------------------------------------------------------------------------------------------------------------------------------------------------------------------------------------------------------------------------------------------------------------------------------------------------------------------------------------------------------------------------------|
| Ruiz-Casares M et al. (43) (2014) | Review – culturally responsive mental health research                                                                                                 | Multiple | Regarding informed consent, the author discusses how to obtain culturally appropriate consent, how to ensure adequate understanding of the consent information, consideration of community structures, documenting informed consent, and determination of decision-making capacity.                                                                                                                                                                                                                                               |
| Offringa M et al. (44) (2013)     | Review - Background and summary of Standards for Research (StaR) in Child Health published standards on the conduction of pediatric clinical research | n/a      | Summary of first 6 StaR Child Health published standards: 1. Consent and recruitment; 2. Containing risk of bias; 3. Data monitoring committees; 4. Determining adequate sample sizes; 5. Selection, measurement, and reporting of outcomes; and 6. Age groups for pediatric trials.                                                                                                                                                                                                                                              |
| Daley C et al. (45) (2013)        | Review - ethical issues associated with autism spectrum disorders research in developing countries                                                    | Multiple | Authors discuss ethical aspects relevant to the conduct of autism spectrum disorders research in developing countries. They mention challenges to informed consent such as parents' lack of knowledge about research.                                                                                                                                                                                                                                                                                                             |
| Denburg A et al. (46) (2012)      | Review – ethical aspects and challenges of pediatric oncology research in LMICs                                                                       | Multiple | Authors conducted a review of ethical issues related to standards of care, trial benefits, ethics review and informed consent. They focused on the ethical implications of drug development and intervention research. Regarding informed consent, they discuss illiteracy, social and political power imbalances, validity of consent in face of ancillary benefits of research, mistrust of foreign investigators by parents, and difficulties aligning local perspectives with international norms.                            |
| Mystakidou K et al. (47) (2009)   | Review – informed consent in human HIV research in developing countries.                                                                              | Multiple | In trials involving children and adolescents, authors discuss the process of enrolling subjects, including challenges in getting informed consent from parents or guardians while protecting the privacy of the subjects. Most studies on this topic involve adolescents, and there is limited data about the assent process in younger children. Authors discuss the characteristics that informed consent should have in the context of HIV trials in the developing world, including the need to address cultural differences. |
| Bhutta Z. (10) (2004)             | Review - analysis of international guidelines on the subject of informed                                                                              | Multiple | Review and discussion of guidelines for obtaining informed consent. The discussion notes that more focus is put on written documentation of consent and less                                                                                                                                                                                                                                                                                                                                                                      |

|                                                    |                                                                                                          |          |                                                                                                                                                                                                                                                                                                     |
|----------------------------------------------------|----------------------------------------------------------------------------------------------------------|----------|-----------------------------------------------------------------------------------------------------------------------------------------------------------------------------------------------------------------------------------------------------------------------------------------------------|
|                                                    | consent                                                                                                  |          | understanding of the process and adaptation to local contexts, and differences regarding when and how communities should be involved in the consent process.                                                                                                                                        |
| McClure C et al. (32) (2004)                       | Review - challenges to conducting HIV vaccine trials with adolescents, including in developing countries | Multiple | Authors identified challenges to HIV vaccine trials with adolescents. Adolescents are minors and need parental consent for participating in research. At the same time, their autonomy and privacy need to be respected. The consent process might be affected by less perception of personal risk. |
| <b>Social Norms, Decision Making, and Autonomy</b> |                                                                                                          |          |                                                                                                                                                                                                                                                                                                     |

|                                     |                                                                                                                                                            |          |                                                                                                                                                                                                                                                                                                                                                                                                                                                                     |
|-------------------------------------|------------------------------------------------------------------------------------------------------------------------------------------------------------|----------|---------------------------------------------------------------------------------------------------------------------------------------------------------------------------------------------------------------------------------------------------------------------------------------------------------------------------------------------------------------------------------------------------------------------------------------------------------------------|
| Kongsholm N et al.(13) (2018)       | Qualitative research– interviews with researchers and donors about consent experience for genetic research                                                 | Pakistan | Researchers report adaptations to consent process including use of elder and oral consent; involving literate witnesses to validate written forms; and disclosure of information adapted to educational level. Challenges include no knowledge about consent process by participants and therapeutic misconception. Donors' motivations for participating include obtaining direct benefit from their participation and a high level of trust in the research team. |
| Embleton L et al. (48) (2015)       | Case study - Ethical guidelines adaptation for three different studies with street connected youth and children                                            | Kenya    | The authors describe processes of consent for street-connected children and youth participating in three research projects. They discuss the importance of guidelines and working with local and international committees, ethicists, and the community to identify areas of special concern. Key recommendations include involving the community and working within the local sociocultural context.                                                               |
| Millum J and Emanuel E. (49) (2015) | Case study – research with abandoned children                                                                                                              | Romania  | The authors discuss how research with abandoned children might be constrained by the challenge of getting informed consent. This might result in this vulnerable group not being included in research for reasons of convenience. They argue that vulnerable groups can be protected by enrolling them in studies that pose no or minimal risks.                                                                                                                    |
| Vreeman R et al. (50) (2012)        | Qualitative research - analysis of community discussion sessions regarding the participation of orphaned children in research.                             | Kenya    | Results showed positive attitudes towards the participation of orphaned children in research, mainly because adults assumed that children would be directly benefited. Consent from parents or guardians was considered necessary but getting assent from children was not. The participation of the community in the consent process was considered appropriate. Authors recommend paying attention to misconceptions about research related benefits.             |
| Molyneux CS et al. (36) (2005)      | Qualitative research - Community views regarding the informed consent process, in the context of studies being carried out by the KEMRI institute in Kenya | Kenya    | Results show that seeking consent from community elders is necessary but does not substitute the need for individual parental consent. Most respondents suggested males should make the decision to participate and that assent should not be sought from children before age 10-13. For inpatient studies, respondents identified illness severity, potential risks, and parents' ability to                                                                       |

|                                                                                           |                                                                                                                                                |                                         |                                                                                                                                                                                                                                                                                                                                                                                                                                                                |
|-------------------------------------------------------------------------------------------|------------------------------------------------------------------------------------------------------------------------------------------------|-----------------------------------------|----------------------------------------------------------------------------------------------------------------------------------------------------------------------------------------------------------------------------------------------------------------------------------------------------------------------------------------------------------------------------------------------------------------------------------------------------------------|
|                                                                                           |                                                                                                                                                |                                         | understand as factors influencing the consent process. Results of the study show some therapeutic misconception and discrepancies regarding which interventions need permission.                                                                                                                                                                                                                                                                               |
| <b>Working in low-literate setting and with indigenous/less-commonly-spoken languages</b> |                                                                                                                                                |                                         |                                                                                                                                                                                                                                                                                                                                                                                                                                                                |
| Mboizi R et al. (22) (2017)                                                               | Mixed methods research – recall and decay of consent information among parents using and audiovisual tool                                      | The Gambia                              | Recall of trial procedures and consent process was evaluated using questionnaires at two points in time. Results show overall good recall of consent when using the Speaking Book audiovisual tool. No differences were found between age, occupation, years of education, religion or family type.                                                                                                                                                            |
| Kalabuanga M et al. (18) (2016)                                                           | Case study – Description of the consent process during a malaria clinical trial                                                                | Democratic Republic of Congo            | Authors identified misunderstanding of the informed consent process among parents. They also identified cases where culturally-accepted guardians might not have legal authority to consent for research. They discuss how the use of a witness can impair parents' autonomy by exerting social pressure. In the context of limited access to care, the ancillary benefits of participating in research may be a strong incentive to participate.              |
| Martellet L et al. (17) (2015)                                                            | Case study – Informed consent for a vaccine trial                                                                                              | The Gambia, Mali, India, Senegal, Ghana | Informed consent for a vaccine trial was sought from parents/legal guardians of children 1-17 years. Written assent was taken from children 12-17. They used literate witnesses when participants/parents were illiterate and translated consent forms to local languages. In some areas, consent was done verbally. Written consent forms were always provided. Some study sites used tools to assess understanding of the research project prior to consent. |
| Tindana P et al. (51) (2012)                                                              | Qualitative – interviews with research staff and mothers of study participants about the informed consent process for a malaria genetics study | Ghana                                   | The consent process was adapted to include community leaders and groups of women. For individual consent, written forms were used but information was adapted to be more relevant to parents. The timing of consent for in-patient cases was modified to obtain it after children had been stabilized. The provision of medical care and direct benefits to children was identified as a motivation for participating.                                         |
| <b>Gender</b>                                                                             |                                                                                                                                                |                                         |                                                                                                                                                                                                                                                                                                                                                                                                                                                                |

|                                                           |                                                                                                             |              |                                                                                                                                                                                                                                                                                                                                                                                                                                                                           |
|-----------------------------------------------------------|-------------------------------------------------------------------------------------------------------------|--------------|---------------------------------------------------------------------------------------------------------------------------------------------------------------------------------------------------------------------------------------------------------------------------------------------------------------------------------------------------------------------------------------------------------------------------------------------------------------------------|
| Kamuya D et al.(15)<br>(2015)                             | Qualitative – focus groups and interviews conducted with participants of RSV and malaria studies.           | Kenya        | Authors describe the phenomenon of silent refusal. Possible causes include avoiding conflict within households, maintaining a good relationship with the research team, and retaining study benefits. For women and young adults, it might be a way to exert agency within the patriarchal system. Authors discuss negotiations that take place during the consent process, and how ethical principles are interpreted and negotiated in a context-specific way.          |
| Sarkar R et al. (29)<br>(2009)                            | Mixed methods research – comprehension and recall of informed consent process in a pediatric diarrhea study | India        | Findings showed low recall of study purposes four years after enrollment. Most respondents were mothers and mentioned spousal approval and free medical care for their children as main motivations to consent and remain in the study. Educational level was significantly associated with recall of study purpose. Few respondents knew they could leave the study at any time. Authors point out the need for continuous reinforcement of the consent process.         |
| Minnies D et al. (12)<br>(2008)                           | Mixed methods – Recall of the consent process for a study of immune protection against TB                   | South Africa | Mothers who had consented for the study then completed a questionnaire about key elements of informed consent, recall, and understanding. Most obtained scores greater than 75% for recall and understanding. 79% were aware of the risks and 64% knew participation was voluntary. A higher level of education and being consented by professional nurses were associated with higher recall. Authors suggest monitoring the quality of consent procedures periodically. |
| <b>Communicating about Risks and Benefits of Research</b> |                                                                                                             |              |                                                                                                                                                                                                                                                                                                                                                                                                                                                                           |

|                                    |                                                                                                                                   |                    |                                                                                                                                                                                                                                                                                                                                                                                                                                                                                                                                      |
|------------------------------------|-----------------------------------------------------------------------------------------------------------------------------------|--------------------|--------------------------------------------------------------------------------------------------------------------------------------------------------------------------------------------------------------------------------------------------------------------------------------------------------------------------------------------------------------------------------------------------------------------------------------------------------------------------------------------------------------------------------------|
| Morris M and Wilson P. (52) (2018) | Case study – research on the use of CPAP in intensive care settings                                                               | Ghana              | Authors describe how consent was obtained, and express concern about the fact that there were no refusals and that this might reflect that consent was not fully informed or participation was not truly voluntary. The authors do not know to which extent parents understood randomization, or that CPAP could be used independently of study participation. They discuss how the lack of access for medical care might influence the consent process.                                                                             |
| Ward CL et al. (53) (2018)         | Qualitative research – interviews with stakeholders about ethical aspects in a pediatric malaria vaccine trial                    | Ghana and Tanzania | Stakeholders identify the importance of community education and a well-adapted consent process in helping avoid misconception about trial benefits and healthcare service provision, as well as in preventing undue inducement by clearly stating risks and benefits.                                                                                                                                                                                                                                                                |
| Devries K et al. (54) (2015)       | Qualitative research - experiences of children participating in a cluster RCT of a school-based violence prevention intervention. | Uganda             | Authors describe the consent process for the RCT and present findings from interviews conducted with children after participating. They found some therapeutic misconception about potential benefits and propose that clearer language in the consent forms might help avoid it.                                                                                                                                                                                                                                                    |
| Serce O et al. (30) (2015)         | Quantitative- Questionnaires administered to parents to assess potential participation in research                                | Turkey             | Authors perform univariate and multivariate logistic regression to identify characteristics that might predict participation. Factors associated with willingness to consent include satisfaction with the content of the informed consent and being a business owner. Factors associated with refusal of consent were older age of parents and owning a car. Parents responded that learning more about the trial and its benefits, ensuring health coverage, and payment of transport expenses would positively influence consent. |
| Angweny V et al. (28) (2014)       | Qualitative – interviews and group discussions with researchers, community members and parents                                    | Kenya              | Authors describe and analyze the community engagement process for the trial. Concerning the consent process, they present results on parents' understanding of the trial one year after recruitment. They report low levels of understanding about the purpose of the trial and the randomisation process. There appeared to be less understanding of the trial where there was less community engagement.                                                                                                                           |
| Paré L et al. (27) (2013)          | Mixed methods research - assessment of the relevance of the informed                                                              | Burkina Faso       | Results showed that prior knowledge of the trial was significantly associated with the decision to participate. Common reasons for                                                                                                                                                                                                                                                                                                                                                                                                   |



|                                |                                                                                                                                                                |         |                                                                                                                                                                                                                                                                                                                                                                                                                                                                             |
|--------------------------------|----------------------------------------------------------------------------------------------------------------------------------------------------------------|---------|-----------------------------------------------------------------------------------------------------------------------------------------------------------------------------------------------------------------------------------------------------------------------------------------------------------------------------------------------------------------------------------------------------------------------------------------------------------------------------|
|                                | consent procedure in a malaria trial comparing the efficacy of two different treatments                                                                        |         | participating were the perceived aid provided by the trial, better quality of care, and better quality of the medication. Information about confidentiality, right to withdraw from the study, and potential risks was poorly retained. Randomization was poorly understood. Authors aim to show that there are other factors besides the information received during the consent process that influence parents' decision to participate in the trial.                     |
| Rajamaran D et al. (24) (2011) | Mixed methods research – analysis of relation between parents' socio-demographic characteristics and likelihood of asking questions during the consent process | India   | The study looked at parents asking questions during the informed consent process. 13.4% of parents asked any questions. There was a high association between asking questions and socio-economic and educational status, and with presence of both parents. Authors conclude that consent materials should be interactive, to make comprehension easier, and that in pediatric trials effort should be made to get participation of both parents in the consent process.    |
| Nabulsi M et al. (14) (2011)   | Qualitative research – perceptions of Lebanese parents about their children's participation in research                                                        | Lebanon | Fear of potential harm or pain caused to children was identified as a main barrier to parental consent, as were complex consent forms and misunderstanding of randomization. Perceived direct benefits of participation, trust in the doctor and the institution, financial gains or previous positive experience with research identified as motivations to participate. Authors recommend improving communication and building trust with parents to enhance recruitment. |
| Oduro AR et al. (55) (2008)    | Mixed methods research – Understanding and retention of informed consent process by parents of children participating in a malaria cohort study                | Ghana   | Findings show overall good recall of procedural aspects of the study. Recall about study benefits was significantly higher than about study risks. Most knew participation was voluntary, but few knew they could withdraw at any time and that information was handled confidentially. Younger parental age was associated with better recall and understanding. Free medical treatment and benefits to the participant were strong motivations for enrolling.             |
| Krosin MT et al. (56) (2006)   | Quantitative – parental understanding of the consent process for a malaria vaccine trial                                                                       | Mali    | By using a multiple-choice questionnaire, researchers identified poor comprehension about withdrawal criteria, study side effects, and investigational rather than therapeutic nature of the intervention. Response rate and percentage of correct answers were higher in a more urban setting than in a rural one.                                                                                                                                                         |

|                                  |                                                                                                                                            |            |                                                                                                                                                                                                                                                                                                                                                                                                                                                                                                                                                              |
|----------------------------------|--------------------------------------------------------------------------------------------------------------------------------------------|------------|--------------------------------------------------------------------------------------------------------------------------------------------------------------------------------------------------------------------------------------------------------------------------------------------------------------------------------------------------------------------------------------------------------------------------------------------------------------------------------------------------------------------------------------------------------------|
| Pace C et al. (26) (2005)        | Qualitative – quality of parental consent in an antimalarial study                                                                         | Uganda     | Most respondents were mothers and had good recall of logistical aspects of the study and study purpose. Comprehension of randomization was low. The primary reason most respondents gave for enrolling their child was to obtain malaria treatment. Many parents felt pressure to enroll because their child was sick. Only 41% reported they could have refused and 65% knew they could quit.                                                                                                                                                               |
| Molyneux CS et al. (57) (2005)   | Mixed methods research – community views about the informed consent process and trust                                                      | Kenya      | Findings show that trust in the research institution by the community is based on the perceived quality of clinical services it provides, and less on research activities. Trust in the research unit is an important reason behind community members' agreeing to participate in research. Responders valued the informed consent process but thought that low education and being in stressful situations impaired understanding. Authors suggest modifying consent procedures by not giving all information at once and testing to improve comprehension. |
| Leach A et al. (25) (1999)       | Qualitative research - Attitudes of the Gambian people to consent to medical research within the context of a H. influenzae vaccine trial. | The Gambia | Semi-structured interviews were conducted with study participants and refusers in urban and rural areas. Results showed that certain points of the trial were recalled well: 90% knew the purpose of the vaccine, but only 10% understood the placebo control design. The main motive for consenting was to receive the vaccine (93%), and for refusing was that the vaccine was experimental (35%) and might have side effects (29%). In all cases the decision was made by just one of the parents.                                                        |
| <b>Research with Adolescents</b> |                                                                                                                                            |            |                                                                                                                                                                                                                                                                                                                                                                                                                                                                                                                                                              |



|                               |                                                                                                                                                                                                           |              |                                                                                                                                                                                                                                                                                                                                                                                                      |
|-------------------------------|-----------------------------------------------------------------------------------------------------------------------------------------------------------------------------------------------------------|--------------|------------------------------------------------------------------------------------------------------------------------------------------------------------------------------------------------------------------------------------------------------------------------------------------------------------------------------------------------------------------------------------------------------|
| Woollet MA et al. (33) (2017) | Case study – consent for orphaned adolescents to participate in a mental health study                                                                                                                     | South Africa | Authors present how consent for research with orphaned adolescents had to be sought from the High Court before approval was granted by academic research committees. The authors discuss how the policy results in excluding vulnerable populations from research and give recommendations for mental health research with adolescents.                                                              |
| Joseph P et al. (58) (2016)   | Qualitative research – Stakeholders' views on international pediatric clinical trials                                                                                                                     | n/a          | Regarding the consent process, challenges identified by stakeholders include consent requirements in certain countries that conflict with adolescents' confidentiality rights; impracticality of using long consent forms with multiple required elements, and the need for guidelines to streamline consent form production.                                                                        |
| Nakkash R et al. (59) (2009)  | Qualitative research – observation of the consent process for a two-phase preparatory study for an RCT to test the impact of a social skill-building intervention to improve mental health in adolescents | Lebanon      | Researchers identified challenges to the consent process: incomplete disclosure of study information; complexity of terms and research design, compounded by low educational levels; issues related to who could provide consent for the child; and social conceptions that youth are not capable of decision making. The greatest threat to the informed consent process was lack of voluntariness. |
| <b>Assent</b>                 |                                                                                                                                                                                                           |              |                                                                                                                                                                                                                                                                                                                                                                                                      |
| Khabour O et al. (23) (2017)  | Qualitative research – focus groups to explore parental perceptions about the informed consent and assent process for research                                                                            | Jordan       | Findings show an acceptable understanding of many aspects related to the consent process. However, some parents believed that informed consent is not necessary for questionnaire studies, there were discrepancies regarding the appropriate age for a child's assent, and some parents said they would force their child to participate regardless of child's wishes.                              |
| Vreeman R et al. (35) (2009)  | Case study - pediatric assent for a study on antiretroviral therapy                                                                                                                                       | Kenya        | Authors describe the process of getting review by both US and Kenyan IRBs, mentioning that there is no guideline about how joint review should be conducted. Authors present the differences between the two countries regarding appropriate age for obtaining assent, and discuss local laws, practices, and international guidelines.                                                              |

<sup>1</sup>Major thematic groupings for articles in Table 2 are provided. Most articles discuss multiple themes, but are grouped here based on the most prominent or significant theme identified in the review.

# BMJ Paediatrics Open

## **Cultural considerations for informed consent in pediatric research in low and middle income countries: A scoping review**

|                               |                                            |
|-------------------------------|--------------------------------------------|
| Journal:                      | <i>BMJ Paediatrics Open</i>                |
| Manuscript ID                 | bmjpo-2018-000298.R2                       |
| Article Type:                 | Original article                           |
| Date Submitted by the Author: | 24-Oct-2018                                |
| Complete List of Authors:     | Colom, Marcela; Wuqu' Kawoq Rohloff, Peter |
| Keywords:                     | Ethics, Health services research           |
|                               |                                            |

SCHOLARONE™  
Manuscripts

1  
2  
3 1 **TITLE PAGE**  
4

5 2

6  
7 3 **Cultural considerations for informed consent in pediatric research in low and middle**  
8 **income countries: A scoping review**  
9  
10 4

11  
12 5  
13  
14 6 Marcela Colom MD<sup>1</sup>, Peter Rohloff MD PhD<sup>1,2,3</sup>  
15  
16  
17 7

18  
19 8 <sup>1</sup>Wuqu' Kawoq | Maya Health Alliance, 2da Avenida 3-48 Zona 3, Barrio Patacabaj, Tecpán,  
20  
21 Chimaltenango, Guatemala  
22  
23

24 10  
25  
26 11 <sup>2</sup>Division of Global Health Equity, Brigham and Women's Hospital, Boston, MA, USA  
27  
28  
29 12

30  
31 13 <sup>3</sup> Corresponding Author. Peter Rohloff, Brigham and Women's Hospital, 75 Francis Street,  
32  
33 14 Boston, MA, 02115. Phone: 617-278-0055. Fax: 888-372-2354. Email:  
34  
35 15 [prohloff@bwh.harvard.edu](mailto:prohloff@bwh.harvard.edu)  
36  
37  
38 16  
39  
40 17  
41  
42 18  
43

44 19 Word count: 3701  
45  
46  
47 20  
48  
49 21  
50  
51 22  
52  
53  
54 23  
55  
56  
57  
58  
59  
60

1  
2  
3 24 **WHAT IS KNOWN ABOUT THIS SUBJECT**  
4  
5

- 6 25 • Conducting research with children in low- and middle-income countries (LMICs)  
7  
8 26 requires careful consideration of socioeconomic inequalities and cultural and  
9  
10 27 linguistic differences.  
11  
12  
13 28 • Existing international standards for the conduct of ethical pediatric research advance  
14  
15 29 core concepts, such as informed consent, voluntariness, and assent, but there often  
16  
17 30 is limited guidance on how to adapt and operationalize these for LMIC settings.  
18  
19  
20

21 **WHAT THIS STUDY ADDS**  
22  
23

- 24 32 • Helpful examples and emerging consensus for best practices in community  
25  
26 33 engagement, verbal and alternative consent procedures, and guarding against  
27  
28 34 therapeutic misconception by caregivers in interventional and randomized  
29  
30 35 controlled trial designs.  
31  
32  
33 36 • The need for additional research where less consensus was apparent, especially  
34  
35 37 around the protection of the individual autonomy of caregivers and safeguarding  
36  
37 38 children's own assent to participate in research.  
38  
39  
40  
41  
42  
43  
44  
45  
46  
47  
48  
49  
50  
51  
52  
53  
54  
55  
56  
57  
58  
59  
60

1  
2  
3 42 **ABSTRACT**  
4  
5  
6 43

7  
8 44 Introduction: Conducting research with children in low- and middle-income countries  
9  
10 45 (LMICs) requires consideration of socioeconomic inequalities and cultural and linguistic  
11  
12 46 differences. Our objective was to survey the literature on informed consent in pediatric LMIC  
13  
14 47 research, assessing for practical guidance for culturally- and linguistically-appropriate  
15  
16 48 procedures.  
17  
18

19 49  
20  
21 50 Methods: We conducted a scoping review on informed consent in pediatric LMIC research  
22  
23 51 searching the Pubmed, Web of Science and PsycINFO databases. Eligible articles were  
24  
25 52 published in English, from any date range, of any study design or format.  
26  
27  
28 53

29  
30  
31 54 Results: The search identified 2,027 references, of which 50 were included in the analysis  
32  
33 55 following full-text review. Reviewed guidelines emphasized individual, informed and  
34  
35 56 voluntary consent from parents and caregivers. Reviewed articles provided detailed practical  
36  
37 57 guidance on adapting these guiding principles to LMIC settings, including considerations for  
38  
39 58 community engagement, verbal or other alternative consent procedures for low-literacy  
40  
41 59 settings or less-commonly spoken languages, and guarding against therapeutic  
42  
43 60 misconception by caregivers. There was uncertainty, however, on how to best protect  
44  
45 61 individual autonomy, especially when influenced by gender dynamics, leadership  
46  
47 62 hierarchies, or the social status of researchers themselves. There was, furthermore, limited  
48  
49 63 research discussing the special case of research involving adolescents or of procedures for  
50  
51 64 documenting assent by participating children.  
52  
53  
54  
55  
56 65

1  
2  
3 66 Conclusions: A scoping review of pediatric research in LMICs revealed substantial guidance  
4  
5 67 on several features of culturally appropriate informed consent . However, additional research  
6  
7 68 and guidance is needed, especially in the areas of gender imbalances, research with  
8  
9 69 adolescents, and children's own assent to participate in research.  
10  
11  
12  
13 70  
14  
15 71  
16  
17  
18  
19  
20  
21  
22  
23  
24  
25  
26  
27  
28  
29  
30  
31  
32  
33  
34  
35  
36  
37  
38  
39  
40  
41  
42  
43  
44  
45  
46  
47  
48  
49  
50  
51  
52  
53  
54  
55  
56  
57  
58  
59  
60

Confidential: For Review Only

## 72 INTRODUCTION

73

74 Prior to World War II, there was little international consensus on the ethical conduct of  
75 human subjects' research. The Nuremberg code, developed in 1947 during the Nuremberg  
76 war crimes trials, was one of the first attempts to articulate basic ethical principles, such as  
77 the right to informed consent.(1) Subsequently, the World Medical Association's (WMA)  
78 Declaration of Helsinki in 1964 provided a more definitive consensus statement on the core  
79 principles of ethical conduct of research--beneficence, self-determination, and informed  
80 consent—which is widely considered the foundational international document in modern  
81 research ethics.(2) Practical guidance on ethical practice is well codified in the joint  
82 statements produced by the Council for International Organizations of Medical Sciences  
83 (CIOMS) and the World Health Organization (WHO).(3)

84

85 Extension of ethical research principles to include considerations appropriate for research in  
86 pediatric populations are also important, including guidance on obtaining informed consent  
87 from parents or guardians, obtaining assent from children themselves, and weighing the  
88 balance of risks and benefits of proposed research.(3,4) Improvements in the conduct and  
89 volume of pediatric clinical trials, which have historically been few in number and of lower  
90 quality than corresponding trials in adult subjects, have also recently been advocated.(5)

91

92 However, there still remains uncertainty around how best to implement international ethical  
93 principles of pediatric research in some settings. This is especially the case in low and  
94 middle-income countries (LMICs), and in research with groups such as indigenous  
95 populations, speakers of less-common languages, or populations with high levels of

1  
2  
3 96 illiteracy. Practically, we experienced this recently while designing a clinical trial of a  
4  
5 97 nutrition intervention for indigenous Maya children in rural Guatemala, and our experience  
6  
7 98 navigating consent, literacy, and translingual adaptation in this population prompted our  
8  
9  
10 99 interest in more formally exploring the topic.(6) To this end, here we conduct a scoping  
11  
12 100 review of the existing literature on cultural and contextual considerations for informed  
13  
14 101 consent in the conduct of pediatric research in LMICs. Through this review, we identify  
15  
16 102 evidence for specific culturally- and contextually-sensitive practices, as well as areas where  
17  
18 103 additional research and guideline development is needed.  
19  
20  
21  
22 104

## 23 105 **METHODS**

### 24 106 25 26 107 **Search and inclusion strategy**

27  
28 108  
29  
30  
31 109 To identify articles, we searched the PubMed, Web of Science and PsycINFO databases. We  
32  
33 110 conducted searches using a combination of the following key terms: “pediatric” or “children”  
34  
35 111 or “adolescents”; “research” or “biomedical research”; “consent” or “informed consent” or  
36  
37 112 “ethics”; “developing countries” or “low income countries” or “middle income countries”;  
38  
39 113 “illiteracy”; “culturally competent”. We used no date limits and included all articles  
40  
41 114 published through May 2018. In addition, we visited the websites of international health  
42  
43 115 policy organizations to identify ethics guidelines for the conduct of research in low- and  
44  
45 116 middle-income countries. We also manually reviewed the reference lists of articles identified  
46  
47 117 using the above methods. For this scoping review, of the articles identified above we included  
48  
49 118 for analysis any type of study design or format (original research, commentary, case study,  
50  
51 119 review, expert opinion), which addressed the informed consent process specifically for  
52  
53  
54  
55  
56  
57  
58  
59  
60



1  
2  
3 120 pediatric or adolescent populations in low or middle-income countries. Articles not in  
4  
5 121 English were excluded.  
6

7  
8 122

### 9 10 123 **Data extraction and synthesis**

11  
12 124

13  
14 125 We exported identified articles into an Excel spreadsheet template which recorded location  
15  
16 126 of study, study type and design, study context, aspects of informed consent examined, and  
17  
18 127 key findings. Both authors reviewed the study titles and abstracts. After removal of articles  
19  
20 128 which were deemed not eligible for inclusion, one author (MC) performed a full text review  
21  
22 129 of all the remaining articles. As a scoping review to assess the patterns of existing literature  
23  
24 130 on informed consent in LMIC pediatric research, assessments of individual study bias and  
25  
26 131 quality were not performed. Data extracted from articles was collated in summary form  
27  
28 132 (Table 1), and major qualitative findings are presented in the following narrative synthesis.  
29  
30  
31  
32

33 133

## 34 35 134 **RESULTS**

36  
37 135

### 38 39 136 **Results of literature screen**

40  
41 137

42  
43  
44 138 A total of 2,027 candidate titles were identified through database searches, supplemented by  
45  
46 139 reference list and website reviews. Of these, 1,721 did not meet eligibility criteria, and 306  
47  
48 140 were included for abstract review. If the abstract was not available but full text was, the title  
49  
50 141 was included for full text review. After abstract review, 50 duplicates were found, one was  
51  
52 142 not in English, 7 were not available (abstract nor full text), and 170 abstracts did not meet  
53  
54 143 inclusion criteria. 78 articles were selected for full text review, of which 24 subsequently did  
55  
56  
57  
58  
59  
60

1  
2  
3 144 not meet inclusion criteria, one was in French, one was a duplicate, and two did not have  
4  
5 145 available full text. Therefore 50 full-text articles were included in this review (Figure 1, Table  
6  
7 146 1, Supplementary Table 1). Of the articles excluded at the abstract and full text review stages,  
8  
9 147 the most common reasons for exclusion were: no mention of the informed consent process  
10  
11 148 for research with pediatric or adolescent populations; research not taking place in a low- or  
12  
13 149 middle-income country; articles on pediatric research in low- or middle-income countries  
14  
15 150 that did not discuss the informed consent process  
16  
17  
18  
19  
20  
21

## 22 152 **Summary of guidelines and commentaries**

23  
24 153  
25  
26 154 We identified seven guidelines that addressed issues of informed consent in international  
27  
28 155 settings and in research involving children in our scoping review. Of these, we selected for  
29  
30 156 detailed review five that were most comprehensive, summarizing key recommendations in  
31  
32 157 Table 1. All guidelines emphasize the importance of obtaining individual, informed and  
33  
34 158 voluntary consent for research.(3,4,7–9) Importantly, however, the guidelines do not  
35  
36 159 necessarily specify in detail how best to operationalize assessment of these core principles.  
37  
38 160 For example, the Declaration of Helsinki comments only that informed consent requires that  
39  
40 161 a subject be adequately informed of the “aims, methods, sources of funding, any possible  
41  
42 162 conflicts of interest, institutional affiliations of the researcher, the anticipated benefits and  
43  
44 163 potential risks of the study and the discomfort it may entail, post-study provisions and any  
45  
46 164 other relevant aspects of the study” (Article 26). (7) Similarly, on voluntariness, the CIOMS  
47  
48 165 guidelines note only that consent is voluntary if “an individual’s decision to participate is  
49  
50  
51 166 free of undue influence” (p. 35). (3)  
52  
53  
54  
55  
56  
57  
58  
59  
60

167

168 Some of the guidelines do suggest modifications appropriate for lower-resource settings,  
169 such as obtaining witnessed verbal consent when literacy is a barrier. (7,9) The United States  
170 National Bioethics Advisory Commission (NBAC) also acknowledges that oral consent  
171 might even be preferable in some circumstances.(8) However, as other commentaries note,  
172 there is little specificity on how best to operationalize these suggestions, such as how to  
173 formally document verbal consent or characteristics of a qualified witness.(10,11)

174

175 Another important consideration of LMIC research addressed in guidelines is an emphasis  
176 on the need to at times obtain consent from community stakeholders and leaders, or other  
177 key local decision makers. Nevertheless, all guidelines unanimously assert that community-  
178 based consent can never replace individual consent. When local cultural practices around  
179 community-based consent contradict core principles of the international consensus on the  
180 informed consent process, such as the need for voluntary individual consent, researchers are  
181 advised to search for culturally sensitive ways of providing all information to potential  
182 participants without compromising the substantive ethical standard of informed consent, an  
183 adaptive process in which local research ethics committees are expected to place a substantial  
184 role. (8,10–12)

185

186 Finally, with respect to children or adolescents not capable of providing informed consent,  
187 in addition to obtaining consent from parents or legal representatives, most guidelines also  
188 reinforce the need to obtain assent from the child or adolescent in an age-appropriate way.

189 (3,4,7,9) The CIOMS guidelines note that assent is “a process...not merely the absence of  
 190 dissent” and requires “meaningful[1] engage[ment] in the research discussion in accordance  
 191 with...capacities” (p. 67). (3) They also note that as adolescents reach the age of maturity,  
 192 their agreement to participate may be ethically considered as informed consent. However, if  
 193 they legally remain minors, researchers are cautioned that consent from a parent is still  
 194 generally needed, but a list is provided of possible situations when parental consent might be  
 195 waived, such as with legally emancipated adolescents, or under circumstances where  
 196 obtaining parental consent is not desirable because of the research topic. (3)

197 **Table 1 Summary of selected major guidelines on ethical conduct of research in children**

| Guideline                                                      | Core principles                                                                                                                                                                                                                                                                                                                                         | Considerations for adapting to low-resource, low-literary, and minority language settings                                                                                                                                                                                                                                                             |
|----------------------------------------------------------------|---------------------------------------------------------------------------------------------------------------------------------------------------------------------------------------------------------------------------------------------------------------------------------------------------------------------------------------------------------|-------------------------------------------------------------------------------------------------------------------------------------------------------------------------------------------------------------------------------------------------------------------------------------------------------------------------------------------------------|
| World Medical Association, Declaration of Helsinki(7)          | <ul style="list-style-type: none"> <li>• If a research subject is not capable of giving informed consent, it should be sought from a legally authorized representative</li> <li>• When the subject can give assent to decisions about participation in research, assent should be sought in addition to consent. Dissent should be respected</li> </ul> | <ul style="list-style-type: none"> <li>• Special attention should be given to the specific information needs of individual potential subjects as well as to the methods used to deliver the information</li> <li>• Consent should be given preferably in writing, if not the non-written consent must be formally documented and witnessed</li> </ul> |
| Council for International Organizations of Medical Sciences(3) | <ul style="list-style-type: none"> <li>• Obtain permission from a parent or a legally authorized representative of the child</li> <li>• Obtain assent from the child or adolescent according to his or her capacity and after having been provided with information tailored to the child’s or adolescent’s level of maturity</li> </ul>                | <ul style="list-style-type: none"> <li>• Consult with and engage communities in the informed consent process</li> <li>• Obtained a signed form as evidence of informed consent, justify any exceptions to this general rule and seek approval of the research ethics committee</li> </ul>                                                             |
| Standards for Research (StaR) in Child Health(4)               | <ul style="list-style-type: none"> <li>• Obtain consent and assent when age-appropriate</li> <li>• Provide age-appropriate, clear, concise, and on-going information for parents and children</li> </ul>                                                                                                                                                | <ul style="list-style-type: none"> <li>• Provide clear justification to involve a particular population and equitable sharing of benefits and risks</li> <li>• Community consultation can be helpful but does not replace the need for individual consent</li> <li>• Strengthen composition and</li> </ul>                                            |

|                                                                                                       |                                                                                                                                                                                                                                                                                                                                                                          |                                                                                                                                                                                                                                                                                                                                                                                                                                                                                                                                                                                                                                                                                                |
|-------------------------------------------------------------------------------------------------------|--------------------------------------------------------------------------------------------------------------------------------------------------------------------------------------------------------------------------------------------------------------------------------------------------------------------------------------------------------------------------|------------------------------------------------------------------------------------------------------------------------------------------------------------------------------------------------------------------------------------------------------------------------------------------------------------------------------------------------------------------------------------------------------------------------------------------------------------------------------------------------------------------------------------------------------------------------------------------------------------------------------------------------------------------------------------------------|
| <p>National Bioethics Advisory Commission, Ethical and policy issues in international research(8)</p> |                                                                                                                                                                                                                                                                                                                                                                          | <p>expertise of local ethics committees</p> <ul style="list-style-type: none"> <li>• Develop culturally appropriate ways to disclose information that is necessary for adherence to the ethical standard of informed consent</li> <li>• Develop procedures to ensure that participants understand the information provided in the consent process</li> <li>• Respect local requirements of asking permission from community representatives for approaching potential participants, but respect the requirement of individual informed consent</li> <li>• Ethics review committees can waive the requirements of written and signed consent in accordance with local cultural norms</li> </ul> |
| <p>European Council and European Parliament Guidelines(9)</p>                                         | <ul style="list-style-type: none"> <li>• Consent should be sought from parents or legal representatives</li> <li>• Information should be provided to the minor according to its capacity of understanding</li> <li>• The explicit wish of a minor who is capable of forming an opinion and assessing information to refuse participation should be considered</li> </ul> | <ul style="list-style-type: none"> <li>• The individual or legal representative has to give written consent. If the individual is unable to write, oral consent may be given in the presence of at least one witness, as provided for in national legislation</li> </ul>                                                                                                                                                                                                                                                                                                                                                                                                                       |

1  
2  
3 199 **Thematic summary of research on consent in LMIC pediatric research**  
4  
5

6 200  
7  
8

9 201 Existing published work on informed consent in pediatric research in LMICs includes a  
10  
11 202 number of review and opinion articles (Table 2) as well as case studies describing the  
12  
13 203 experience of individual research teams and discussing the challenges and solutions utilized  
14  
15 204 when adapting consent processes to their local context. We summarize several major themes  
16  
17 205 emerging from these studies here in narrative form and provide detailed key findings from  
18  
19 206 the reviewed articles in the accompanying Tables.  
20  
21

22  
23 207 [insert Table 2 here]  
24  
25

26 208 **Table 2 Summary of review and opinion articles on ethical conduct of research in**  
27  
28 209 **children**

29  
30  
31

| Reference (Year)           | Study Description                                                                  | Study Location | Major findings                                                                                                                                                                                                                                                                                                                                                                                                                                                            |
|----------------------------|------------------------------------------------------------------------------------|----------------|---------------------------------------------------------------------------------------------------------------------------------------------------------------------------------------------------------------------------------------------------------------------------------------------------------------------------------------------------------------------------------------------------------------------------------------------------------------------------|
| Ott MA et al.(37) (2018)   | Review – participation of children of minor parents in research                    | Multiple       | Discussion on international research documents and existing laws and practices regarding consent for research for children of minor parents. Few countries have regulations about the subject, which might result in exclusion of those children from research. Authors recommend involving minors in the decision-making about their children and adapting consent procedures so minor parents can participate and their children's vulnerabilities correctly addressed. |
| Zulu JM et al. (34) (2018) | Review - Ethical challenges of post-abortion care research in adolescents in LMICs | Multiple       | Authors included 14 articles in their analysis. Regarding the consent process, challenges identified include difficulties in seeking consent from parents/guardians of adolescents who are below the consent age, vulnerability of adolescents compromising ability to make decisions, fear of losing access to health care affecting informed consent process, and inadequate guidance on how and when to involve communities in the consent process.                    |

32  
33  
34  
35  
36  
37  
38  
39  
40  
41  
42  
43  
44  
45  
46  
47  
48  
49  
50  
51  
52  
53  
54  
55  
56  
57  
58  
59  
60

|                                                                                                    |                              |                                                                                         |                                |                                                                                                                                                                                                                                                                                                                                                                                                                                                                                                                                                                                                     |
|----------------------------------------------------------------------------------------------------|------------------------------|-----------------------------------------------------------------------------------------|--------------------------------|-----------------------------------------------------------------------------------------------------------------------------------------------------------------------------------------------------------------------------------------------------------------------------------------------------------------------------------------------------------------------------------------------------------------------------------------------------------------------------------------------------------------------------------------------------------------------------------------------------|
| 1<br>2<br>3<br>4<br>5<br>6<br>7<br>8<br>9<br>10                                                    | Regmi P et al. (38) (2017)   | Review – informed consent in health research in LMICs                                   | Multiple, but focused on Nepal | Authors discuss challenges in adapting informed consent: verbal versus written informed consent in areas of limited literacy; difficulties posed by having to translate consent documents to local languages; issues around the legal age to consent, and how clear threshold ages of consent are not clear in local guidelines.                                                                                                                                                                                                                                                                    |
| 11<br>12<br>13<br>14<br>15<br>16<br>17<br>18<br>19<br>20<br>21<br>22<br>23<br>24<br>25<br>26<br>27 | Mandava A et al. (39) (2016) | Review – comparison between consent processes in developing and developed countries     | Multiple                       | Authors aimed to compare data about comprehension and voluntariness. In both settings comprehension of study information varies among participants, and comprehension of randomization and placebo use is poor. Participants in developing countries seem to be less likely to say they can refuse participation or withdraw and worry more about the consequences of doing so. Recommendations include developing validated questions to measure comprehension and voluntariness and conducting studies on the impact of cultural norms and socio-demographic characteristics on informed consent. |
| 28<br>29<br>30<br>31<br>32<br>33<br>34<br>35<br>36<br>37<br>38<br>39<br>40                         | Joseph P et al. (40) (2016)  | Review - Views of stakeholders on aspects of conducting research with children in LMICs | Multiple                       | Regarding informed consent, stakeholders believe that disempowerment, poor education, and difficulty in translating scientific concepts were barriers to informed decision making. Authors recommend simplifying consent forms and presenting them in culturally and linguistically appropriate format with verification of parental comprehension. Authors discuss that Western ethical principles of consent and child assent, autonomy, and individualism need to be contextualized.                                                                                                             |
| 41<br>42<br>43<br>44<br>45<br>46<br>47<br>48<br>49<br>50<br>51<br>52<br>53<br>54<br>55             | Morrow B et al. (41) (2015)  | Opinion – Consent for pediatric critical care research in South Africa                  | South Africa                   | Authors discuss legal issues in South Africa that create confusion for informed consent for children. They identify barriers to the consent process: impracticability of getting consent when urgent action is needed; the validity of consent in high-stress settings; addressing parents during stressful situations; sociocultural issues and the differences in communication and response to authority figures. The authors discuss alternatives to the prospective informed consent, such as the deferred consent model.                                                                      |



|                                   |                                                                                                                                                       |          |                                                                                                                                                                                                                                                                                                                                                                                                                |
|-----------------------------------|-------------------------------------------------------------------------------------------------------------------------------------------------------|----------|----------------------------------------------------------------------------------------------------------------------------------------------------------------------------------------------------------------------------------------------------------------------------------------------------------------------------------------------------------------------------------------------------------------|
| MacLeod SM et al. (11) (2015)     | Review – ethical issues of pediatric drug trials in LMICs                                                                                             | Multiple | The review discusses vulnerabilities of pediatric research participants, in particular children in LMICs. Authors discuss characteristics of the consent process, and how socioeconomic status, religious belief, and distribution of power affect decisions to participate. They point to the need to consider cultural differences, and the appropriateness of obtaining community consent in some contexts. |
| Swain T. (42) (2014)              | Opinion - barriers to pediatric clinical drug trials in low resource settings, with emphasis in India                                                 | India    | The author discusses how the consent process for research can be affected by poverty and lack of education. The author points out that the consent process should be clear and assent should be sought from children 7-18 years old, as per Indian guidelines. Deferred consent for neonatal intensive care studies and other high-acuity settings may reduce caregiver stress and be preferred.               |
| Bekker L et al. (31) (2014)       | Review - Ethical issues of HIV research in resource limited countries                                                                                 | Multiple | The authors review ethical issues in HIV research with adolescents in LMICs. They point out best practices for consenting adolescents: auditing ethical-legal requirements for consent; involving adolescents in decision making; ensuring language, age, and cultural appropriateness; and giving sufficient time and resources to consent.                                                                   |
| Ruiz-Casares M et al. (43) (2014) | Review – culturally responsive mental health research                                                                                                 | Multiple | Regarding informed consent, the author discusses how to obtain culturally appropriate consent, how to ensure adequate understanding of the consent information, consideration of community structures, documenting informed consent, and determination of decision-making capacity.                                                                                                                            |
| Offringa M et al. (44) (2013)     | Review - Background and summary of Standards for Research (StaR) in Child Health published standards on the conduction of pediatric clinical research | n/a      | Summary of first 6 StaR Child Health published standards: 1. Consent and recruitment; 2. Containing risk of bias; 3. Data monitoring committees; 4. Determining adequate sample sizes; 5. Selection, measurement, and reporting of outcomes; and 6. Age groups for pediatric trials.                                                                                                                           |
| Daley C et al. (45) (2013)        | Review - ethical issues associated with autism spectrum disorders research in developing countries                                                    | Multiple | Authors discuss ethical aspects relevant to the conduct of autism spectrum disorders research in developing countries. They mention challenges to informed consent such as parents' lack of knowledge about research.                                                                                                                                                                                          |



|                                 |                                                                                                          |          |                                                                                                                                                                                                                                                                                                                                                                                                                                                                                                                                   |
|---------------------------------|----------------------------------------------------------------------------------------------------------|----------|-----------------------------------------------------------------------------------------------------------------------------------------------------------------------------------------------------------------------------------------------------------------------------------------------------------------------------------------------------------------------------------------------------------------------------------------------------------------------------------------------------------------------------------|
| Denburg A et al. (46) (2012)    | Review – ethical aspects and challenges of pediatric oncology research in LMICs                          | Multiple | Authors conducted a review of ethical issues related to standards of care, trial benefits, ethics review and informed consent. They focused on the ethical implications of drug development and intervention research. Regarding informed consent, they discuss illiteracy, social and political power imbalances, validity of consent in face of ancillary benefits of research, mistrust of foreign investigators by parents, and difficulties aligning local perspectives with international norms.                            |
| Mystakidou K et al. (47) (2009) | Review – informed consent in human HIV research in developing countries.                                 | Multiple | In trials involving children and adolescents, authors discuss the process of enrolling subjects, including challenges in getting informed consent from parents or guardians while protecting the privacy of the subjects. Most studies on this topic involve adolescents, and there is limited data about the assent process in younger children. Authors discuss the characteristics that informed consent should have in the context of HIV trials in the developing world, including the need to address cultural differences. |
| Bhutta Z. (10) (2004)           | Review - analysis of international guidelines on the subject of informed consent                         | Multiple | Review and discussion of guidelines for obtaining informed consent. The discussion notes that more focus is put on written documentation of consent and less understanding of the process and adaptation to local contexts, and differences regarding when and how communities should be involved in the consent process.                                                                                                                                                                                                         |
| McClure C et al. (32) (2004)    | Review - challenges to conducting HIV vaccine trials with adolescents, including in developing countries | Multiple | Authors identified challenges to HIV vaccine trials with adolescents. Adolescents are minors and need parental consent for participating in research. At the same time, their autonomy and privacy need to be respected. The consent process might be affected by less perception of personal risk.                                                                                                                                                                                                                               |

210

211

212

213 Understanding social norms around decision making and protecting individual autonomy

1  
2  
3 214  
4  
5

6 215 An important principle highlighted in international guidelines on informed consent in  
7  
8 216 LMICs is appropriate and early engagement with existing local leadership structures (such  
9  
10 217 as a council of elders) balanced against respect for the autonomy of individual children or  
11  
12 218 their caregivers.(3,8) In practice, this can be a delicate balance to maintain (Table 3).  
13  
14 219 Kongsholm and colleagues, for example, describe consent processes in rural Pakistan, where  
15  
16 220 family structures are patriarchal and hierarchical. In this setting, consent procedures involved  
17  
18 221 first seeking consent from an elder, who provided initial consent for the entire family.  
19  
20 222 However, under this approach, the voluntariness of individual participants may be  
21  
22 223 undermined, and it is unclear how best to ensure that individuals still retain an “opt out”  
23  
24 224 mechanism or, conversely, the right to participate in research if they wish to do so but the elder  
25  
26 225 declines.(13)  
27  
28  
29  
30

31  
32 226  
33  
34

35 227 Another important consideration explored by some studies is understanding how not all  
36  
37 228 potential consenting caregivers may feel empowered to decline participating in research.  
38  
39 229 Consent procedures administered by local research personnel or by individuals with high  
40  
41 230 social status, such as physicians, may inspire trust.(13,14) However it may also make them  
42  
43 231 reluctant to decline participation, or to resist active participation. For example, in one study  
44  
45 232 in Kenya, explicit refusals to participate were often considered to be impolite. Here  
46  
47 233 researchers found that caregivers expressed their unwillingness to participate by delaying the  
48  
49 234 consent process, or by participating inconsistently in research procedures even after initially  
50  
51 235 having consented to the study.(15)  
52  
53  
54  
55  
56  
57  
58  
59  
60

236 [insert Table 3 here]

237 **Table 3 Summary of articles discussing Social Norms, Decision Making, and**  
 238 **Autonomy<sup>1</sup>**

|                                     |                                                                                                                                |          |                                                                                                                                                                                                                                                                                                                                                                                                                                                                     |
|-------------------------------------|--------------------------------------------------------------------------------------------------------------------------------|----------|---------------------------------------------------------------------------------------------------------------------------------------------------------------------------------------------------------------------------------------------------------------------------------------------------------------------------------------------------------------------------------------------------------------------------------------------------------------------|
| Kongsholm N et al.(13) (2018)       | Qualitative research– interviews with researchers and donors about consent experience for genetic research                     | Pakistan | Researchers report adaptations to consent process including use of elder and oral consent; involving literate witnesses to validate written forms; and disclosure of information adapted to educational level. Challenges include no knowledge about consent process by participants and therapeutic misconception. Donors’ motivations for participating include obtaining direct benefit from their participation and a high level of trust in the research team. |
| Embleton L et al. (48) (2015)       | Case study - Ethical guidelines adaptation for three different studies with street connected youth and children                | Kenya    | The authors describe processes of consent for street-connected children and youth participating in three research projects. They discuss the importance of guidelines and working with local and international committees, ethicists, and the community to identify areas of special concern. Key recommendations include involving the community and working within the local sociocultural context.                                                               |
| Millum J and Emanuel E. (49) (2015) | Case study – research with abandoned children                                                                                  | Romania  | The authors discuss how research with abandoned children might be constrained by the challenge of getting informed consent. This might result in this vulnerable group not being included in research for reasons of convenience. They argue that vulnerable groups can be protected by enrolling them in studies that pose no or minimal risks.                                                                                                                    |
| Vreeman R et al. (50) (2012)        | Qualitative research - analysis of community discussion sessions regarding the participation of orphaned children in research. | Kenya    | Results showed positive attitudes towards the participation of orphaned children in research, mainly because adults assumed that children would be directly benefited. Consent from parents or guardians was considered necessary but getting assent from children was not. The participation of the community in the consent process was considered appropriate. Authors recommend paying attention to misconceptions about research related benefits.             |
| Molyneux CS et al. (36) (2005)      | Qualitative research - Community views regarding the informed consent process, in the                                          | Kenya    | Results show that seeking consent from community elders is necessary but does not substitute the need for individual parental consent. Most respondents                                                                                                                                                                                                                                                                                                             |

|  |                                                                      |  |                                                                                                                                                                                                                                                                                                                                                                                                                        |
|--|----------------------------------------------------------------------|--|------------------------------------------------------------------------------------------------------------------------------------------------------------------------------------------------------------------------------------------------------------------------------------------------------------------------------------------------------------------------------------------------------------------------|
|  | context of studies being carried out by the KEMRI institute in Kenya |  | suggested males should make the decision to participate and that assent should not be sought from children before age 10-13. For inpatient studies, respondents identified illness severity, potential risks, and parents' ability to understand as factors influencing the consent process. Results of the study show some therapeutic misconception and discrepancies regarding which interventions need permission. |
|--|----------------------------------------------------------------------|--|------------------------------------------------------------------------------------------------------------------------------------------------------------------------------------------------------------------------------------------------------------------------------------------------------------------------------------------------------------------------------------------------------------------------|

239 <sup>1</sup>In this and subsequent tables, articles are presented by major thematic groupings. Most articles  
 240 discuss multiple themes, but are grouped here based on the most prominent or significant theme  
 241 identified in the review.

242

243 Adapting consent procedures to low-literate settings

244

245 There is strong consensus in international ethics guidelines that written, informed  
 246 consent is preferred when conducting research (Table 4). In the case of pediatric research,  
 247 this again typically involves obtaining written consent from one or both primary  
 248 caregivers.(4,9,16) However, in many LMIC settings, literacy may be low or a high value  
 249 may be placed on oral interactions, and lack of alternative consent procedures may violate  
 250 another core ethics principle, namely the equitable distribution of research benefits and  
 251 burdens across populations.(3,14,17) Some of the studies we reviewed described these  
 252 procedures, with verbal consent commonly being obtained, most often in the presence of a  
 253 literate witness who is able to read available consent documents. (13,14,17,18) In one very  
 254 thoughtful piece, Kalabuanga and colleagues note, however, that witnesses may often impose  
 255 their views on the consenting caregiver and their child, rather than encourage dialog and act  
 256 as a safeguard, especially since they are often recruited in an ad hoc fashion (e.g., other  
 257 literate patients or ancillary hospital staff).(18) Kalabuanga et al. go on to suggest that these

258 challenges may be mitigated by careful vetting and training of independent witnesses or,  
 259 alternatively, by allowing potential consenting caregivers to use a trusted relative or friend  
 260 as their witness.(18)

261

262 Another issue identified in the review is that of emerging new mandates in some LMICs to  
 263 document consent procedures. For example, in India, audiovisual documentation of obtaining  
 264 informed consent is now required for most clinical trials if participants are low-literate. This  
 265 introduced significant new logistical challenges and costs related to obtaining and archiving  
 266 recordings, and it may also pose a barrier to potential research subjects who may distrust or  
 267 refuse to be recorded.(19)

268 [insert Table 4 here]

269 **Table 4 Summary of articles discussing working in low-literate settings, and with**  
 270 **indigenous or less-commonly-spoken languages**

|                                 |                                                                                                           |                                         |                                                                                                                                                                                                                                                                                                                                                                                                                                                   |
|---------------------------------|-----------------------------------------------------------------------------------------------------------|-----------------------------------------|---------------------------------------------------------------------------------------------------------------------------------------------------------------------------------------------------------------------------------------------------------------------------------------------------------------------------------------------------------------------------------------------------------------------------------------------------|
| Mboizi R et al.<br>(22) (2017)  | Mixed methods research – recall and decay of consent information among parents using and audiovisual tool | The Gambia                              | Recall of trial procedures and consent process was evaluated using questionnaires at two points in time. Results show overall good recall of consent when using the Speaking Book audiovisual tool. No differences were found between age, occupation, years of education, religion or family type.                                                                                                                                               |
| Kalabuanga M et al. (18) (2016) | Case study – Description of the consent process during a malaria clinical trial                           | Democratic Republic of Congo            | Authors identified misunderstanding of the informed consent process among parents. They also identified cases where culturally-accepted guardians might not have legal authority to consent for research. They discuss how the use of a witness can impair parents' autonomy by exerting social pressure. In the context of limited access to care, the ancillary benefits of participating in research may be a strong incentive to participate. |
| Martellet L et al. (17) (2015)  | Case study – Informed consent for a vaccine trial                                                         | The Gambia, Mali, India, Senegal, Ghana | Informed consent for a vaccine trial was sought from parents/legal guardians of children 1-17 years. Written assent was taken from children 12-17. They used                                                                                                                                                                                                                                                                                      |

|                              |                                                                                                                                                |       |                                                                                                                                                                                                                                                                                                                                                                                                                        |
|------------------------------|------------------------------------------------------------------------------------------------------------------------------------------------|-------|------------------------------------------------------------------------------------------------------------------------------------------------------------------------------------------------------------------------------------------------------------------------------------------------------------------------------------------------------------------------------------------------------------------------|
|                              |                                                                                                                                                |       | literate witnesses when participants/parents were illiterate and translated consent forms to local languages. In some areas, consent was done verbally. Written consent forms were always provided. Some study sites used tools to assess understanding of the research project prior to consent.                                                                                                                      |
| Tindana P et al. (51) (2012) | Qualitative – interviews with research staff and mothers of study participants about the informed consent process for a malaria genetics study | Ghana | The consent process was adapted to include community leaders and groups of women. For individual consent, written forms were used but information was adapted to be more relevant to parents. The timing of consent for in-patient cases was modified to obtain it after children had been stabilized. The provision of medical care and direct benefits to children was identified as a motivation for participating. |

271

272 Working in indigenous or less-commonly-spoken languages

273

274 International ethics guidelines emphasize that research information should be  
 275 provided to consenting caregivers in a local language understandable to the individual (Table  
 276 4).(7,8,16) However, this is most commonly understood to be a working lingua franca, and  
 277 the issue of and practical approach to provisioning consent processes in an indigenous  
 278 language is largely unaddressed in LMICs.(20) This is an important consideration, given that  
 279 a substantial proportion of the potential pediatric research population in LMICs are from  
 280 populations that speak indigenous or less-commonly-spoken languages.(21) In an interesting  
 281 review of lessons learned in a pediatric vaccine trial in West Africa, Martellet and colleagues  
 282 noted challenges in preparing consent procedures in some of the less-common language  
 283 groups included in the trial, where use of the written form was uncommon, where substantial  
 284 need to rely on metaphor and paraphrase made back-translation difficult, and where written  
 285 documents were perceived as not being dynamic enough in cultures which valued

1  
2  
3 286 interactivity and person-to-person exchange. They describe alternative procedures, such as  
4  
5 287 the preparation of recordings of consent scripts in local languages and extensive practice  
6  
7 288 sessions with research staff obtaining consent in local languages.(17) Similarly, another  
8  
9 289 vaccine trial in The Gambia described the successful use of audio-visual Speaking Books in  
10  
11  
12 290 local less-common languages to consent caregivers. (22)  
13  
14

15 291

16  
17  
18 292 Gender dynamics in caregiver consent  
19

20  
21 293  
22  
23

24 294 Local gender dynamics and decision making procedures when consenting male and  
25  
26 295 female caregivers for research is an important consideration (Table 5). For example, when  
27  
28 296 consenting with caregiving couples or within an extended family unit, instances are discussed  
29  
30 297 where a female caregiver wishes to allow her child to participate, but is unable to do so  
31  
32 298 because her husband or another male authority figure refuses.(13) The opposite may also  
33  
34 299 occur, if a research study is consented by a male figure, but requires significant participatory  
35  
36 300 effort from the primary female for study-related activities, leading the woman to express their  
37  
38 301 refusal through procedural delay or inconsistent participation.(15) Given concerns about  
39  
40 302 gender power imbalance and potential repercussions for consenting female caregivers, some  
41  
42 303 studies discussed working to routinely involve fathers or male authority figures in the consent  
43  
44 304 process for more complex or higher-risk research interventions.(15,23) In one interesting  
45  
46 305 study based in India, Rajaraman and colleagues found that caregivers were more likely to  
47  
48 306 actively participate in the consent process when both were present. They also observed,  
49  
50  
51  
52  
53 307 however, that this factor may have been due the fact that most study staff obtaining consent  
54  
55  
56  
57  
58  
59  
60



308 were male, and they call for more research on how the gender of research staff impacts the  
 309 consent process.(24)

310

311 It is important to note that most discussions of gender dynamics that we reviewed were  
 312 limited in nuance, tending to focus on instances of overt overriding of female decision-  
 313 making by male authorities. A broader consideration of the range of ways in which female  
 314 caregivers communicate, influence, and negotiate decision-making with male family  
 315 members and other community authorities is an obvious point for future investigation.

316 [insert Table 5 here]

317 **Table 5 Summary of articles discussing gender**

|                              |                                                                                                             |              |                                                                                                                                                                                                                                                                                                                                                                                                                                                                   |
|------------------------------|-------------------------------------------------------------------------------------------------------------|--------------|-------------------------------------------------------------------------------------------------------------------------------------------------------------------------------------------------------------------------------------------------------------------------------------------------------------------------------------------------------------------------------------------------------------------------------------------------------------------|
| Kamuya D et al.(15) (2015)   | Qualitative – focus groups and interviews conducted with participants of RSV and malaria studies.           | Kenya        | Authors describe the phenomenon of silent refusal. Possible causes include avoiding conflict within households, maintaining a good relationship with the research team, and retaining study benefits. For women and young adults, it might be a way to exert agency within the patriarchal system. Authors discuss negotiations that take place during the consent process, and how ethical principles are interpreted and negotiated in a context-specific way.  |
| Sarkar R et al. (29) (2009)  | Mixed methods research – comprehension and recall of informed consent process in a pediatric diarrhea study | India        | Findings showed low recall of study purposes four years after enrollment. Most respondents were mothers and mentioned spousal approval and free medical care for their children as main motivations to consent and remain in the study. Educational level was significantly associated with recall of study purpose. Few respondents knew they could leave the study at any time. Authors point out the need for continuous reinforcement of the consent process. |
| Minnies D et al. (12) (2008) | Mixed methods – Recall of the consent process for a study of immune protection                              | South Africa | Mothers who had consented for the study then completed a questionnaire about key elements of informed consent, recall, and understanding. Most obtained scores greater than 75% for recall and                                                                                                                                                                                                                                                                    |



|  |            |  |                                                                                                                                                                                                                                                                            |
|--|------------|--|----------------------------------------------------------------------------------------------------------------------------------------------------------------------------------------------------------------------------------------------------------------------------|
|  | against TB |  | understanding. 79% were aware of the risks and 64% knew participation was voluntary. A higher level of education and being consented by professional nurses were associated with higher recall. Authors suggest monitoring the quality of consent procedures periodically. |
|--|------------|--|----------------------------------------------------------------------------------------------------------------------------------------------------------------------------------------------------------------------------------------------------------------------------|

318

## 319 Disclosing potential benefits and risks of participation in research

320

321 Participation in some research studies, particularly those with a randomized  
 322 controlled design or those with differing intervention arms, may not result in direct benefit  
 323 to all participants. Several studies report difficulties explaining to caregivers that medical  
 324 research procedures may not result in direct benefit to their children, and in verifying that  
 325 caregivers comprehended the substance of randomization or control procedures (Table 6).  
 326 (25–28) Others noted the need to address issues of information recall and retention,  
 327 particularly with complex study procedures or consent forms, and to emphasize the right of  
 328 study withdrawal and the ongoing reaffirmation of consent throughout a study. (26–29)  
 329 Furthermore, other reports discussed how therapeutic misconception—the perception by  
 330 research subjects that participation in any component of a multiple-arm, controlled trial, will  
 331 result in therapeutic benefits—might be hard to avoid in certain contexts, as it might be  
 332 affected by factors like educational level and cultural and religious beliefs about  
 333 disease.(13,18)

334

335 At the same time, care must be given to a culturally-appropriate degree of information  
 336 disclosure. For example, in several studies, caregivers—especially those of higher

1  
2  
3 337 socioeconomic or educational status—were more likely to participate when provided with  
4  
5 338 detailed and in-depth information about the study processes and given opportunities to ask  
6  
7 339 questions.(12,23,24,30) At the same time, other case studies point out how over-detailed  
8  
9 340 discussion of study procedures or scientific rationale may provoke unneeded reserve or  
10  
11 341 suspicion where such detailed disclosures by health professionals are not culturally  
12  
13 342 customary.(13)  
14  
15  
16  
17  
18  
19

343

20 344 Finally, in settings where access to healthcare and other important social goods may be  
21  
22 345 limited, even basic diagnostic or ancillary procedures that occur as part of a research studies  
23  
24 346 may be better than the local standard of care, leading to an undue inducement or highly  
25  
26 347 compelling incentives for caregivers to enroll their children in research, even after being  
27  
28 348 informed about the experimental nature or studies and the risk-benefit balance.(11,13,18)  
29  
30 349 These considerations highlight the importance of considering the socio-economic and  
31  
32 350 cultural background of study settings well before beginning research and making plans to  
33  
34 351 incorporate appropriate early, equitable benefit-sharing measures when possible, such as  
35  
36 352 using study resources to improve community-level care not just care for eligible trial  
37  
38 353 participants.(18)  
39  
40  
41  
42  
43

44 354 [insert Table 6 here]  
45  
46

47 355 **Table 6 Summary of articles discussing communicating about risks and benefits of**  
48 356 **research**  
49

|                                    |                                                                     |       |                                                                                                                                                                                                                                                                                |
|------------------------------------|---------------------------------------------------------------------|-------|--------------------------------------------------------------------------------------------------------------------------------------------------------------------------------------------------------------------------------------------------------------------------------|
| Morris M and Wilson P. (52) (2018) | Case study – research on the use of CPAP in intensive care settings | Ghana | Authors describe how consent was obtained, and express concern about the fact that there were no refusals and that this might reflect that consent was not fully informed or participation was not truly voluntary. The authors do not know to which extent parents understood |
|------------------------------------|---------------------------------------------------------------------|-------|--------------------------------------------------------------------------------------------------------------------------------------------------------------------------------------------------------------------------------------------------------------------------------|

|                              |                                                                                                                                                              |                    |                                                                                                                                                                                                                                                                                                                                                                                                                                                                                                                                      |
|------------------------------|--------------------------------------------------------------------------------------------------------------------------------------------------------------|--------------------|--------------------------------------------------------------------------------------------------------------------------------------------------------------------------------------------------------------------------------------------------------------------------------------------------------------------------------------------------------------------------------------------------------------------------------------------------------------------------------------------------------------------------------------|
|                              |                                                                                                                                                              |                    | randomization, or that CPAP could be used independently of study participation. They discuss how the lack of access for medical care might influence the consent process.                                                                                                                                                                                                                                                                                                                                                            |
| Ward CL et al. (53) (2018)   | Qualitative research – interviews with stakeholders about ethical aspects in a pediatric malaria vaccine trial                                               | Ghana and Tanzania | Stakeholders identify the importance of community education and a well-adapted consent process in helping avoid misconception about trial benefits and healthcare service provision, as well as in preventing undue inducement by clearly stating risks and benefits.                                                                                                                                                                                                                                                                |
| Devries K et al. (54) (2015) | Qualitative research - experiences of children participating in a cluster RCT of a school-based violence prevention intervention.                            | Uganda             | Authors describe the consent process for the RCT and present findings from interviews conducted with children after participating. They found some therapeutic misconception about potential benefits and propose that clearer language in the consent forms might help avoid it.                                                                                                                                                                                                                                                    |
| Serce O et al. (30) (2015)   | Quantitative- Questionnaires administered to parents to assess potential participation in research                                                           | Turkey             | Authors perform univariate and multivariate logistic regression to identify characteristics that might predict participation. Factors associated with willingness to consent include satisfaction with the content of the informed consent and being a business owner. Factors associated with refusal of consent were older age of parents and owning a car. Parents responded that learning more about the trial and its benefits, ensuring health coverage, and payment of transport expenses would positively influence consent. |
| Angweny V et al. (28) (2014) | Qualitative – interviews and group discussions with researchers, community members and parents                                                               | Kenya              | Authors describe and analyze the community engagement process for the trial. Concerning the consent process, they present results on parents' understanding of the trial one year after recruitment. They report low levels of understanding about the purpose of the trial and the randomisation process. There appeared to be less understanding of the trial where there was less community engagement.                                                                                                                           |
| Paré L et al. (27) (2013)    | Mixed methods research - assessment of the relevance of the informed consent procedure in a malaria trial comparing the efficacy of two different treatments | Burkina Faso       | Results showed that prior knowledge of the trial was significantly associated with the decision to participate. Common reasons for participating were the perceived aid provided by the trial, better quality of care, and better quality of the medication. Information about confidentiality, right to withdraw from the study, and potential risks was poorly                                                                                                                                                                     |

|                                |                                                                                                                                                                |         |                                                                                                                                                                                                                                                                                                                                                                                                                                                                             |
|--------------------------------|----------------------------------------------------------------------------------------------------------------------------------------------------------------|---------|-----------------------------------------------------------------------------------------------------------------------------------------------------------------------------------------------------------------------------------------------------------------------------------------------------------------------------------------------------------------------------------------------------------------------------------------------------------------------------|
|                                |                                                                                                                                                                |         | retained. Randomization was poorly understood. Authors aim to show that there are other factors besides the information received during the consent process that influence parents' decision to participate in the trial.                                                                                                                                                                                                                                                   |
| Rajamaran D et al. (24) (2011) | Mixed methods research – analysis of relation between parents' socio-demographic characteristics and likelihood of asking questions during the consent process | India   | The study looked at parents asking questions during the informed consent process. 13.4% of parents asked any questions. There was a high association between asking questions and socio-economic and educational status, and with presence of both parents. Authors conclude that consent materials should be interactive, to make comprehension easier, and that in pediatric trials effort should be made to get participation of both parents in the consent process.    |
| Nabulsi M et al. (14) (2011)   | Qualitative research – perceptions of Lebanese parents about their children's participation in research                                                        | Lebanon | Fear of potential harm or pain caused to children was identified as a main barrier to parental consent, as were complex consent forms and misunderstanding of randomization. Perceived direct benefits of participation, trust in the doctor and the institution, financial gains or previous positive experience with research identified as motivations to participate. Authors recommend improving communication and building trust with parents to enhance recruitment. |
| Oduro AR et al. (55) (2008)    | Mixed methods research – Understanding and retention of informed consent process by parents of children participating in a malaria cohort study                | Ghana   | Findings show overall good recall of procedural aspects of the study. Recall about study benefits was significantly higher than about study risks. Most knew participation was voluntary, but few knew they could withdraw at any time and that information was handled confidentially. Younger parental age was associated with better recall and understanding. Free medical treatment and benefits to the participant were strong motivations for enrolling.             |
| Krosin MT et al. (56) (2006)   | Quantitative – parental understanding of the consent process for a malaria vaccine trial                                                                       | Mali    | By using a multiple-choice questionnaire, researchers identified poor comprehension about withdrawal criteria, study side effects, and investigational rather than therapeutic nature of the intervention. Response rate and percentage of correct answers were higher in a more urban setting than in a rural one.                                                                                                                                                         |
| Pace C et al. (26) (2005)      | Qualitative – quality of parental consent in an antimalarial study                                                                                             | Uganda  | Most respondents were mothers and had good recall of logistical aspects of the study and study purpose. Comprehension of randomization was low. The primary reason most respondents gave for                                                                                                                                                                                                                                                                                |

|                                |                                                                                                                                            |            |                                                                                                                                                                                                                                                                                                                                                                                                                                                                                                                                                              |
|--------------------------------|--------------------------------------------------------------------------------------------------------------------------------------------|------------|--------------------------------------------------------------------------------------------------------------------------------------------------------------------------------------------------------------------------------------------------------------------------------------------------------------------------------------------------------------------------------------------------------------------------------------------------------------------------------------------------------------------------------------------------------------|
|                                |                                                                                                                                            |            | enrolling their child was to obtain malaria treatment. Many parents felt pressure to enroll because their child was sick. Only 41% reported they could have refused and 65% knew they could quit.                                                                                                                                                                                                                                                                                                                                                            |
| Molyneux CS et al. (57) (2005) | Mixed methods research – community views about the informed consent process and trust                                                      | Kenya      | Findings show that trust in the research institution by the community is based on the perceived quality of clinical services it provides, and less on research activities. Trust in the research unit is an important reason behind community members' agreeing to participate in research. Responders valued the informed consent process but thought that low education and being in stressful situations impaired understanding. Authors suggest modifying consent procedures by not giving all information at once and testing to improve comprehension. |
| Leach A et al. (25) (1999)     | Qualitative research - Attitudes of the Gambian people to consent to medical research within the context of a H. influenzae vaccine trial. | The Gambia | Semi-structured interviews were conducted with study participants and refusers in urban and rural areas. Results showed that certain points of the trial were recalled well: 90% knew the purpose of the vaccine, but only 10% understood the placebo control design. The main motive for consenting was to receive the vaccine (93%), and for refusing was that the vaccine was experimental (35%) and might have side effects (29%). In all cases the decision was made by just one of the parents.                                                        |

357

358 Adolescents

359

360 Adolescents constitute a special population with vulnerabilities different from those  
 361 of adults and younger children, and they should be included in research that addresses their  
 362 specific needs (Table 7). However, as legal minors they often cannot give informed consent  
 363 for research.(16) In research in LMICs, regulations vary significantly from country to country  
 364 regarding when adolescents can provide legal consent for research.(31) For example, even  
 365 when legal frameworks allow adolescents to seek, for example, contraception services

366 without parental permission, they cannot necessarily provide consent for research on that  
 367 theme.(32,33) In a scoping review of post abortion care research, Zulu and coauthors discuss  
 368 how the need to balance adolescents' privacy needs and the demand for parental consent  
 369 poses difficulties for researchers in this field.(34) Woollett and colleagues describe an  
 370 interesting case study where they sought consent from a High Court in South Africa for  
 371 research involving orphaned HIV-positive adolescents. In that study, they provide detailed  
 372 recommendations for consent involving adolescents, including training staff about  
 373 confidentiality requirements; recognizing immature decision-making by adolescents and  
 374 developing appropriate methods for probing comprehension and consent; and utilizing  
 375 methods that promote active participation in research, such as mobile phones.(33)

376 [insert Table 7 here]

377 **Table 7 Summary of articles discussing research with adolescents**

|                                                          |                               |                                                                                                                                                      |              |                                                                                                                                                                                                                                                                                                                                         |
|----------------------------------------------------------|-------------------------------|------------------------------------------------------------------------------------------------------------------------------------------------------|--------------|-----------------------------------------------------------------------------------------------------------------------------------------------------------------------------------------------------------------------------------------------------------------------------------------------------------------------------------------|
| 31<br>32<br>33<br>34<br>35<br>36<br>37<br>38<br>39<br>40 | Woollet MA et al. (33) (2017) | Case study – consent for orphaned adolescents to participate in a mental health study                                                                | South Africa | Authors present how consent for research with orphaned adolescents had to be sought from the High Court before approval was granted by academic research committees. The authors discuss how the policy results in excluding vulnerable populations from research and give recommendations for mental health research with adolescents. |
| 41<br>42<br>43<br>44<br>45<br>46<br>47<br>48<br>49       | Joseph P et al. (58) (2016)   | Qualitative research – Stakeholders' views on international pediatric clinical trials                                                                | n/a          | Regarding the consent process, challenges identified by stakeholders include consent requirements in certain countries that conflict with adolescents' confidentiality rights; impracticality of using long consent forms with multiple required elements, and the need for guidelines to streamline consent form production.           |
| 50<br>51<br>52<br>53<br>54<br>55<br>56                   | Nakkash R et al. (59) (2009)  | Qualitative research – observation of the consent process for a two-phase preparatory study for an RCT to test the impact of a social skill-building | Lebanon      | Researchers identified challenges to the consent process: incomplete disclosure of study information; complexity of terms and research design, compounded by low educational levels; issues related to who could provide consent for the child; and social conceptions that youth                                                       |

|  |                                                      |  |                                                                                                                    |
|--|------------------------------------------------------|--|--------------------------------------------------------------------------------------------------------------------|
|  | intervention to improve mental health in adolescents |  | are not capable of decision making. The greatest threat to the informed consent process was lack of voluntariness. |
|--|------------------------------------------------------|--|--------------------------------------------------------------------------------------------------------------------|

378

379 Assent

380

381 Pediatric research guidelines are unanimous on the need to obtain age-appropriate  
 382 assent from children and adolescents who do not provide their own informed consent (Table  
 383 1). However, we found little explicit discussion or description of procedures for obtaining  
 384 assent in the research reports we reviewed (Table 8). (35,36) One interesting qualitative study  
 385 on parental perceptions of assent in Jordan revealed considerable variability in caregivers'  
 386 perspectives about at what age assent should be solicited or, even, if assent should in all cases  
 387 be obtained and dissent respected.(23)

388 [insert Table 8 here]

389 **Table 8 Summary of articles discussing assent**

390

|                                    |                                                                                                                                                                       |           |                                                                                                                                                                                                                                                                                                                                                                                                                                  |
|------------------------------------|-----------------------------------------------------------------------------------------------------------------------------------------------------------------------|-----------|----------------------------------------------------------------------------------------------------------------------------------------------------------------------------------------------------------------------------------------------------------------------------------------------------------------------------------------------------------------------------------------------------------------------------------|
| 40 Khabour O et al.<br>(23) (2017) | 41 Qualitative research –<br>42 focus groups to<br>43 explore parental<br>44 perceptions about the<br>45 informed consent and<br>46 assent process for<br>47 research | 48 Jordan | 49 Findings show an acceptable<br>50 understanding of many aspects related to<br>51 the consent process. However, some<br>52 parents believed that informed consent is<br>53 not necessary for questionnaire studies,<br>54 there were discrepancies regarding the<br>55 appropriate age for a child's assent, and<br>56 some parents said they would force their<br>57 child to participate regardless of child's<br>58 wishes. |
| 59 Vreeman R et al.<br>(35) (2009) | 60 Case study - pediatric<br>assent for a study on<br>antiretroviral therapy                                                                                          | Kenya     | Authors describe the process of getting<br>review by both US and Kenyan IRBs,<br>mentioning that there is no guideline<br>about how joint review should be<br>conducted. Authors present the<br>differences between the two countries<br>regarding appropriate age for obtaining                                                                                                                                                 |



|  |  |  |                                                                          |
|--|--|--|--------------------------------------------------------------------------|
|  |  |  | assent, and discuss local laws, practices, and international guidelines. |
|--|--|--|--------------------------------------------------------------------------|

391

392

**DISCUSSION**

393

394

395

396 Children in low-resource settings are highly vulnerable to exploitation in research, because  
397 of circumstances including socioeconomic inequalities, limited access to health care, and  
398 high burden of illness.(60) In addition, even where international consensus exists around core  
399 ethical principles for providing protections to children as research subjects, it may be unclear  
400 how best to operationalize those principles in many low-resources settings, where gender  
401 norms, literacy, unfamiliarity with scientific research, and language barriers may all be  
402 important adaptive barriers. (10,11)

403

404 Through a scoping review of research reports and case studies from LMICs we identified,  
405 however, several core areas where existing research reports provided considerable insight  
406 and operational guidance which could be used to guide informed consent design processes in  
407 additional LMIC settings. These included: (1) *careful consideration of community hierarchy*,  
408 where consent for research may first proceed through a council of elders or other authority  
409 figure, prior to approaching individual caregivers; (2) *guidance on developing verbal consent*  
410 *procedures* in settings where caregivers have low literacy levels; (3) and *recognition of the*  
411 *challenges of consent in indigenous or less-commonly spoken languages*, particularly when  
412 that language is not commonly written and where alternative procedures, such as audio  
413 recordings in the language, must be employed; and (4) *careful consideration of the possibility*



1  
2  
3 414 *of therapeutic misconception* and of developing consent procedures that ensure caregivers'  
4  
5 415 comprehension of the potential benefits (or lack thereof) and risks of research procedures for  
6  
7 416 their children.  
8  
9

10 417

11  
12  
13 418 However, within these four broad thematic areas, we also noted the need for additional  
14  
15 419 careful investigation. In particular, there is considerable uncertainty on how to ensure the  
16  
17 420 principle of subsequent individual informed consent when community leaders or other  
18  
19 421 authorities are approached first. This is especially the case when gender power imbalance is  
20  
21 422 at play, and female caregivers may be either unempowered to consent or to opt out of a  
22  
23 423 research decision made by a male authority. In addition, the social status of individuals  
24  
25 424 administering or witnessing consent procedures may unduly influence the decision-making  
26  
27 425 of caregivers, and research is needed to better understand and accommodate for the  
28  
29 426 interpersonal dynamics of obtaining consent.  
30  
31  
32  
33  
34

35 427

36  
37  
38 428 Finally, two thematic topics seem to be particularly underrepresented in the literature on  
39  
40 429 pediatric LMIC research, and more work is urgently needed. First, despite extensive  
41  
42 430 discussions about the difficulties of conducting research with adolescents, we found only few  
43  
44 431 studies with practical discussions or guidance on how to navigate these difficulties. More  
45  
46 432 investigation of the ethical conduct of research with adolescents is needed, with a broader  
47  
48 433 representation of health conditions, research designs, and geographic regions. Second,  
49  
50 434 despite strong representation of the principle of assent in international guidelines on research  
51  
52 435 with children and adolescents, we found little research of cultural and regional differences  
53  
54  
55  
56  
57  
58  
59  
60

1  
2  
3 436 around notions of assent and virtually no discussion of the mechanics of assessing assent in  
4  
5 437 research studies. Additional research into the topic of assent for research among children in  
6  
7 438 LMICs should be an important priority.  
8  
9

10 439

11  
12  
13 440 Our review has two important limitations that must be considered. First, we included only  
14  
15 441 articles published in English in major indexing databases. We believe this approach is  
16  
17 442 justified, given our desire to provide a high-level overview of the topic without focusing  
18  
19 443 specifically on any geographic region. Nevertheless, our review has undoubtedly missed  
20  
21 444 resources in other languages or within the grey literature, which could be taken up in more  
22  
23 445 detailed region-specific work on this topic. Second, given the diversity and heterogeneity of  
24  
25 446 the literature reviewed, it was not possible to detail many of the practical insights and tips  
26  
27 447 given in the individual articles. Nevertheless, given the annotation and thematic  
28  
29 448 organization provided in Supplementary Table 1, we are confident that readers will be able  
30  
31 449 to identify areas of particular interest for more in-depth examination.  
32  
33  
34  
35  
36  
37  
38  
39  
40  
41  
42  
43  
44  
45  
46  
47  
48  
49  
50  
51  
52  
53  
54  
55  
56  
57  
58  
59  
60

1  
2  
3  
4  
5  
6  
7  
8  
9  
10  
11  
12  
13  
14  
15  
16  
17  
18  
19  
20  
21  
22  
23  
24  
25  
26  
27  
28  
29  
30  
31  
32  
33  
34  
35  
36  
37  
38  
39  
40  
41  
42  
43  
44  
45  
46  
47  
48  
49  
50  
51  
52  
53  
54  
55  
56  
57  
58  
59  
60

450 **ABBREVIATIONS**

- 451 IRB: Institutional review board
- 452 LMIC: Low and middle-income country
- 453 RCT: Randomized clinical trial
- 454 STaR: Standards for Research in Child Health

Confidential: For Review Only

1  
2  
3 455 **FUNDING**  
4  
5

6 456 This work was unfunded.  
7  
8

9 457  
10  
11  
12  
13  
14  
15  
16  
17  
18  
19  
20  
21  
22  
23  
24  
25  
26  
27  
28  
29  
30  
31  
32  
33  
34  
35  
36  
37  
38  
39  
40  
41  
42  
43  
44  
45  
46  
47  
48  
49  
50  
51  
52  
53  
54  
55  
56  
57  
58  
59  
60

Confidential: For Review Only

1  
2  
3  
4  
5  
6  
7  
8  
9  
10  
11  
12  
13  
14  
15  
16  
17  
18  
19  
20  
21  
22  
23  
24  
25  
26  
27  
28  
29  
30  
31  
32  
33  
34  
35  
36  
37  
38  
39  
40  
41  
42  
43  
44  
45  
46  
47  
48  
49  
50  
51  
52  
53  
54  
55  
56  
57  
58  
59  
60

458 **COMPETING INTERESTS**

459 None.

460

Confidential: For Review Only

1  
2  
3 461 **AUTHOR'S CONTRIBUTIONS**  
4  
5

6 462 MC designed the search strategy, extracted data from articles, and wrote the first draft of the  
7  
8 463 manuscript. PR conceived the study, reviewed abstracts, and revised the manuscript.  
9

10  
11 464  
12

13  
14 465  
15  
16  
17  
18  
19  
20  
21  
22  
23  
24  
25  
26  
27  
28  
29  
30  
31  
32  
33  
34  
35  
36  
37  
38  
39  
40  
41  
42  
43  
44  
45  
46  
47  
48  
49  
50  
51  
52  
53  
54  
55  
56  
57  
58  
59  
60

Confidential: For Review Only

1  
2  
3  
4  
5  
6  
7  
8  
9  
10  
11  
12  
13  
14  
15  
16  
17  
18  
19  
20  
21  
22  
23  
24  
25  
26  
27  
28  
29  
30  
31  
32  
33  
34  
35  
36  
37  
38  
39  
40  
41  
42  
43  
44  
45  
46  
47  
48  
49  
50  
51  
52  
53  
54  
55  
56  
57  
58  
59  
60

466 **DATA SHARING STATEMENT**

467 Not applicable

468

Confidential: For Review Only

1  
2  
3 469 **ACKNOWLEDGMENTS**  
4

5 470 We thank research subjects and clinical staff at Maya Health Alliance for inspiring our  
6  
7 471 interest in this important topic.  
8  
9

10 472  
11  
12  
13  
14  
15  
16  
17  
18  
19  
20  
21  
22  
23  
24  
25  
26  
27  
28  
29  
30  
31  
32  
33  
34  
35  
36  
37  
38  
39  
40  
41  
42  
43  
44  
45  
46  
47  
48  
49  
50  
51  
52  
53  
54  
55  
56  
57  
58  
59  
60

Confidential: For Review Only



1  
2  
3  
4  
5  
6  
7  
8  
9  
10  
11  
12  
13  
14  
15  
16  
17  
18  
19  
20  
21  
22  
23  
24  
25  
26  
27  
28  
29  
30  
31  
32  
33  
34  
35  
36  
37  
38  
39  
40  
41  
42  
43  
44  
45  
46  
47  
48  
49  
50  
51  
52  
53  
54  
55  
56  
57  
58  
59  
60

473 **FIGURE LEGENDS**

474 **Figure 1. Results of Literature Screen.** Flow diagram depicting results of the literature  
475 search and review procedure.

476

477

478

Confidential: For Review Only

479 **REFERENCES**

- 480 1. Weindling P. The Origins of Informed Consent: The International Scientific  
481 Commission on Medical War Crimes, and the Nuremberg Code. *Bull Hist Med.*  
482 2001;75(1):37–71.
- 483 2. Rickham P. Human Experimentation. Code of Ethics of the World Medical  
484 Association. Declaration of Helsinki. *Br Med J.* 1964;2 (5402)(177).
- 485 3. Council for International Organizations of Medical Sciences (CIOMS). International  
486 Ethical Guidelines for Health-related Research Involving Humans, Fourth Edition.  
487 [Internet]. 2016. Available from:  
488 [http://www.sciencedirect.com/science/article/B6VC6-45F5X02-](http://www.sciencedirect.com/science/article/B6VC6-45F5X02-9C/2/e44bc37a6e392634b1cf436105978f01)  
489 [9C/2/e44bc37a6e392634b1cf436105978f01](http://www.sciencedirect.com/science/article/B6VC6-45F5X02-9C/2/e44bc37a6e392634b1cf436105978f01)
- 490 4. Caldwell PHY, Dans L, Newman J, Sammons H, Spriggs M, Tambe P, et al. StaR  
491 Child Health Standard 1 : Consent and Recruitment. *Pediatrics.* 2012.
- 492 5. Klassen TP, Hartling L, Hamm M, van der Lee JH, Ursum J, Offringa M. StaR Child  
493 Health: an initiative for RCTs in children. *Lancet* [Internet]. 2009 Oct  
494 17;374(9698):1310–2. Available from: [http://dx.doi.org/10.1016/S0140-](http://dx.doi.org/10.1016/S0140-6736(09)61803-1)  
495 [6736\(09\)61803-1](http://dx.doi.org/10.1016/S0140-6736(09)61803-1)
- 496 6. Martinez B, Webb MF, Gonzalez A, Douglas K, Grazioso P, Rohloff P, et al.  
497 Complementary feeding intervention on stunted Guatemalan children : a randomised  
498 controlled trial. *BMJ Paediatr Open.* 2018;1–8.
- 499 7. World Medical Association. WMA Declaration of Helsinki - Ethical Principles for  
500 Medical Research Invol...: . 2017;(June 1964):1–9. Available from:

- 1  
2  
3 501 <http://eds.b.ebscohost.com/eds/pdfviewer/pdfviewer?sid=a4bced6b-7270-457a->  
4  
5 502 [9730-e5a47e439a7a%40sessionmgr105&vid=6&hid=126](http://eds.b.ebscohost.com/eds/pdfviewer/pdfviewer?sid=a4bced6b-7270-457a-9730-e5a47e439a7a%40sessionmgr105&vid=6&hid=126)  
6  
7  
8 503 8. National Bioethics Advisory Commission. Ethical and Policy Issues Research:  
9  
10 504 Clinical Trials in Developing Countries Vol. 1 [Internet]. 2001. 59 p. Available  
11  
12 505 from: <http://bioethics.georgetown.edu/nbac/clinical/Vol1.pdf>  
13  
14  
15  
16 506 9. European Commission. EU Directive 2001/20/EC. Off J Eur Communities.  
17  
18 507 2001;2001(April):1–15.  
19  
20  
21 508 10. Bhutta ZA. Beyond informed consent. Bull World Health Organ. 2004  
22  
23 509 Oct;82(10):771–7.  
24  
25  
26 510 11. MacLeod SM, Knoppert DC, Stanton-Jean M, Avard D. Pediatric clinical drug trials  
27  
28 511 in low-income countries: key ethical issues. Paediatr Drugs. 2015 Feb;17(1):83–90.  
29  
30  
31 512 12. Minnies D, Hawkrigde T, Hanekom W, Ehrlich R, London L, Hussey G. Evaluation  
32  
33 513 of the quality of informed consent in a vaccine field trial in a developing country  
34  
35 514 setting. BMC Med Ethics. 2008;9:1–9.  
36  
37  
38  
39 515 13. Halmsted Kongsholm NC, Lassen J, Sandoe P. “I didn’t have anything to decide, I  
40  
41 516 wanted to help my kids” - An interview-based study of consent procedures for  
42  
43 517 sampling human biological material for genetic research in rural Pakistan. AJOB  
44  
45 518 Empir Bioeth. 2018;4515(April 2014):1–35.  
46  
47  
48  
49 519 14. Nabulsi M, Khalil Y, Makhoul J. Parental attitudes towards and perceptions of their  
50  
51 520 children’s participation in clinical research: A developing-country perspective. J  
52  
53 521 Med Ethics. 2011;37(7):420–3.  
54  
55  
56  
57  
58  
59  
60

- 1  
2  
3 522 15. Kamuya DM, Theobald SJ, Marsh V, Parker M, Geissler WP, Molyneux SC. “The  
4  
5 523 one who chases you away does not tell you go”: silent refusals and complex power  
6  
7 524 relations in research consent processes in Coastal Kenya. PLoS One.  
8  
9  
10 525 2015;10(5):e0126671.  
11  
12  
13 526 16. Macrae DJ. The Council for International Organizations and Medical Sciences  
14  
15 527 (CIOMS) guidelines on ethics of clinical trials. Proc Am Thorac Soc. 2007  
16  
17 528 May;4(2):176–8, discussion 178-9.  
18  
19  
20 529 17. Martellet L, Sow SO, Diallo A, Hodgson A, Kampmann B, Hirve S, et al. Ethical  
21  
22 530 Challenges and Lessons Learned During the Clinical Development of a Group A  
23  
24 531 Meningococcal Conjugate Vaccine. Clin Infect Dis. 2015 Nov;61 Suppl 5:S422-7.  
25  
26  
27  
28 532 18. Kalabuanga M, Ravinetto R, Maketa V, Muhindo Mavoko H, Fungula B, Inocência  
29  
30 533 da Luz R, et al. The Challenges of Research Informed Consent in Socio-  
31  
32 534 Economically Vulnerable Populations: A Viewpoint From the Democratic Republic  
33  
34 535 of Congo. Dev World Bioeth. 2016;16(2):64–9.  
35  
36  
37  
38 536 19. Shetty P, Maurya M, Figer B, Thatte U, Gogtay N. Audiovisual recording of the  
39  
40 537 consenting process in clinical research: Experiences from a tertiary referral center.  
41  
42 538 Perspect Clin Res [Internet]. 2018 Jan 1;9(1):44–7. Available from:  
43  
44 539 <http://www.picronline.org/article.asp?issn=2229-3485>  
45  
46  
47  
48 540 20. Fitzpatrick EFM, Martiniuk ALC, D’Antoine H, Oscar J, Carter M, Elliott EJ.  
49  
50 541 Seeking consent for research with indigenous communities: a systematic review.  
51  
52 542 BMC Med Ethics. 2016 Oct;17(1):65.  
53  
54  
55 543 21. Flood D, Rohloff P. Indigenous languages and global health. Lancet Glob Heal

- 1  
2  
3 544 [Internet]. 2018;6(2):e134–5. Available from: <http://dx.doi.org/10.1016/S2214->  
4  
5 545 109X(17)30493-X  
6  
7  
8 546 22. Mboizi RB, Afolabi MO, Okoye M, Kampmann B, Roca A, Idoko OT. Recall and  
9  
10 547 decay of consent information among parents of infants participating in a randomized  
11  
12 548 controlled clinical trial using an audio-visual tool in The Gambia. *Hum Vaccin*  
13  
14  
15 549 *Immunother.* 2017 Sep;13(9):2185–91.  
16  
17  
18 550 23. Khabour OF, Alomari MA, Al-Sheyab NA. Parental Perceptions About Informed  
19  
20 551 Consent/Assent in Pediatric Research in Jordan. *J Empir Res Hum Res Ethics.* 2017  
21  
22 552 Oct;12(4):261–8.  
23  
24  
25 553 24. Rajaraman D, Jesuraj N, Geiter L, Bennett S, Grewal HM, Vaz M. How  
26  
27 554 participatory is parental consent in low literacy rural settings in low income  
28  
29 555 countries? Lessons learned from a community based study of infants in South India.  
30  
31 556 *BMC Med Ethics.* 2011 Feb;12:3.  
32  
33  
34  
35 557 25. Leach A, Hilton S, Greenwood BM, Manneh E, Dibba B, Wilkins A, et al. An  
36  
37 558 evaluation of the informed consent procedure used during a trial of a *Haemophilus*  
38  
39 559 *influenzae* type B conjugate vaccine undertaken in The Gambia, West Africa. *Soc*  
40  
41 560 *Sci Med.* 1999;48(2):139–48.  
42  
43  
44  
45 561 26. Pace C, Talisuna A, Wendler D, Maiso F, Wabwire-Mangen F, Bakyaita N, et al.  
46  
47 562 Quality of parental consent in a Ugandan malaria study. *Am J Public Health.*  
48  
49 563 2005;95(7):1184–9.  
50  
51  
52  
53 564 27. Paré Toe L, Ravinetto RM, Dierickx S, Gryseels C, Tinto H, Rouamba N, et al.  
54  
55 565 Could the decision of trial participation precede the informed consent process?  
56  
57  
58  
59  
60

- 1  
2  
3 566 Evidence from Burkina Faso. *PLoS One*. 2013;8(11):1–10.  
4  
5  
6 567 28. Angwenyi V, Kamuya D, Mwachiro D, Kalama B, Marsh V, Njuguna P, et al.  
7  
8 568 Complex realities: community engagement for a paediatric randomized controlled  
9  
10 569 malaria vaccine trial in Kilifi, Kenya. *Trials*. 2014 Feb;15:65.  
11  
12  
13 570 29. Sarkar R, Grandin EW, Gladstone BP, Muliyl J, Kang G. Comprehension and recall  
14  
15 571 of informed consent among participating families in a birth cohort study on  
16  
17 572 diarrhoeal disease. *Public Health Ethics*. 2009;2(1):37–44.  
18  
19  
20  
21 573 30. Serce O, Gonen I, Bakir M. Factors Influencing Parental Consent in a Hypothetical  
22  
23 574 Pediatric Vaccine Trial in a Developing Country Setting: A Questionnaire Study.  
24  
25 575 Account Res [Internet]. 2015;22(1):1–13. Available from:  
26  
27 576 <http://dx.doi.org/10.1080/08989621.2014.882779>  
28  
29  
30  
31 577 31. Bekker L, Slack C, Lee S, Shah S, Kapogiannis B. Ethical Issues in Adolescent HIV  
32  
33 578 Research in Resource-Limited Countries. *J Acquir Immune Defic Syndr*.  
34  
35 579 2014;65(Supplement 1):24–8.  
36  
37  
38 580 32. McClure CA, Gray G, Rybczyk GK, Wright PF. Challenges to conducting HIV  
39  
40 581 preventative vaccine trials with adolescents. *J Acquir Immune Defic Syndr*. 2004  
41  
42 582 Jun;36(2):726–33.  
43  
44  
45  
46 583 33. Woollett N, Psychology MA, Th A, Peter J, Cluver L, Brahmbhatt H. Enrolling  
47  
48 584 HIV-positive adolescents in mental health research : A case study reflecting on  
49  
50 585 legal and ethical complexities. 2017;107(8):679–83.  
51  
52  
53  
54 586 34. Zulu JM, Ali J, Hallez K, Kass N, Michelo C, Hyder AA. Ethics challenges and  
55  
56 587 guidance related to research involving adolescent post-abortion care: A scoping  
57  
58  
59  
60

- 1  
2  
3 588 review. *Reprod Health*. 2018;15(1):1–10.  
4  
5  
6 589 35. Vreeman RC, Nyandiko WM, Meslin EM. Pediatric Assent for a Study of  
7  
8 590 Antiretroviral Therapy Dosing for Children in Western Kenya: A Case Study in  
9  
10 591 International Research Collaboration. *J Empir Res Hum Res Ethics* [Internet].  
11  
12 592 2009;4(1):3–16. Available from: <http://www.jstor.org/stable/10.1525/jer.2009.4.1.3>  
13  
14  
15  
16 593 36. Molyneux CS, Wassenaar DR, Peshu N, Marsh K. “Even if they ask you to stand by  
17  
18 594 a tree all day, you will have to do it (laughter)...!”: Community voices on the notion  
19  
20 595 and practice of informed consent for biomedical research in developing countries.  
21  
22 596 *Soc Sci Med*. 2005;61(2):443–54.  
23  
24  
25  
26 597 37. Ott MA, Crawley FP, Saez-Llorens X, Owusu-Agyei S, Neubauer D, Dubin G, et al.  
27  
28 598 Ethical Considerations for the Participation of Children of Minor Parents in Clinical  
29  
30 599 Trials. *Paediatr Drugs*. 2018 Jun;20(3):215–22.  
31  
32  
33 600 38. Regmi PR, Aryal N, Kurmi O, Pant PR, van Teijlingen E, Wasti SP. Informed  
34  
35 601 Consent in Health Research: Challenges and Barriers in Low-and Middle-Income  
36  
37 602 Countries with Specific Reference to Nepal. *Dev World Bioeth*. 2017;17(2):84–9.  
38  
39  
40  
41 603 39. Mandava A, Pace C, Campbell B, Emanuel E. The quality of informed consent:  
42  
43 604 mapping the landscape. A review of empirical data from developing and developed  
44  
45 605 countries. *J Med Ethics*. 2016;38(6):356–65.  
46  
47  
48 606 40. Joseph PD, Caldwell PHY, Tong A. Stakeholder Views of Clinical Trials in Low-  
49  
50 607 and Middle-Income Countries : A Systematic Review. 2016;137(2).  
51  
52  
53  
54 608 41. Morrow BM, Argent AC, Kling S. Informed consent in paediatric critical care  
55  
56 609 research--a South African perspective. *BMC Med Ethics*. 2015 Sep;16:62.  
57  
58  
59  
60

- 1  
2  
3 610 42. Swain TR. Clinical trials for children: some concerns. *Indian J Pharmacol* [Internet].  
4  
5 611 2014;46(2):145–6. Available from:  
6  
7 612 <http://ovidsp.ovid.com/ovidweb.cgi?T=JS&PAGE=reference&D=medl&NEWS=N>  
8  
9 613 <http://ovidsp.ovid.com/ovidweb.cgi?T=JS&PAGE=reference&D=medl&NEWS=N>  
10  
11 <http://ovidsp.ovid.com/ovidweb.cgi?T=JS&PAGE=reference&D=medl&NEWS=N>  
12  
13 614 43. Ruiz-Casares M. Research ethics in global mental health: Advancing culturally  
14  
15 615 responsive mental health research. *Transcult Psychiatry*. 2014;51(6):790–805.  
16  
17  
18 616 44. Offringa M, Needham AC, Chan WWY. StaR Child Health: Improving global  
19  
20 617 standards for child health research. *Early Hum Dev* [Internet]. 2013;89(11):861–4.  
21  
22 618 Available from: <http://dx.doi.org/10.1016/j.earlhumdev.2013.09.011>  
23  
24  
25 619 45. Daley TC, Singhal N, Krishnamurthy V. Ethical considerations in conducting  
26  
27 620 research on autism spectrum disorders in low and middle income countries. *J Autism*  
28  
29 621 *Dev Disord*. 2013;43(9):2002–14.  
30  
31  
32  
33 622 46. Denburg AE, Joffe S, Gupta S, Howard SC, Ribeiro RC, Antillon FA, et al. Pediatric  
34  
35 623 oncology research in low income countries: ethical concepts and challenges. *Pediatr*  
36  
37 624 *Blood Cancer*. 2012 Apr;58(4):492–7.  
38  
39  
40  
41 625 47. Mystakidou K, Panagiotou I, Katsaragakis S, Tsilika E, Parpa. Ethical and practical  
42  
43 626 challenges of implementing informed consent in HIV/AIDS clinical trials in  
44  
45 627 developing or resource-limited countries. *J Soc Asp HIV/AIDS*. 2009;6(2):46–57.  
46  
47  
48 628 48. Embleton L, Ott MA, Wachira J, Naanyu V, Kamanda A, Makori D, et al. Adapting  
49  
50 629 ethical guidelines for adolescent health research to street-connected children and  
51  
52 630 youth in low- and middle-income countries: A case study from western Kenya. *BMC*  
53  
54 631 *Med Ethics*. 2015;



- 1  
2  
3 632 49. Millum J, Emanuel E. The Ethics of International Research with Abandoned  
4  
5 633 Children. 2015;35(1):30–7.  
6  
7  
8 634 50. Vreeman R, Kamaara E, Kamanda A, Ayuku D, Nyandiko W, Atwoli L, et al.  
9  
10 635 Community Perspectives on Research Consent Involving Vulnerable Children in  
11  
12 636 Western Kenya. *J Empir Res Hum Res Ethics* [Internet]. 2012;7(4):44–55. Available  
13  
14 637 from: <http://journals.sagepub.com/doi/10.1525/jer.2012.7.4.44>  
15  
16  
17  
18 638 51. Tindana P, Bull S, Amenga-Etego L, De Vries J, Aborigo R, Koram K, et al.  
19  
20 639 Seeking consent to genetic and genomic research in a rural Ghanaian setting: A  
21  
22 640 qualitative study of the MalariaGEN experience. *BMC Med Ethics* [Internet].  
23  
24 641 2012;13(1):1. Available from: BMC Medical Ethics  
25  
26  
27  
28 642 52. Morris MC, Wilson PT. Medical Device Research in Resource-Poor Settings: A  
29  
30 643 Pediatric Case Study in Ghana. *IRB Ethics Hum Res*. 2018;36(4):1–7.  
31  
32  
33 644 53. Ward CL, Shaw D, Anane-Sarpong E, Sankoh O, Tanner M, Elger B. The Ethics of  
34  
35 645 Health Care Delivery in a Pediatric Malaria Vaccine Trial: The Perspectives of  
36  
37 646 Stakeholders From Ghana and Tanzania. *J Empir Res Hum Res Ethics*.  
38  
39 647 2018;13(1):26–41.  
40  
41  
42  
43 648 54. Devries KM, Child JC, Elbourne D, Naker D, Heise L. “I never expected that it  
44  
45 649 would happen, coming to ask me such questions”: Ethical aspects of asking children  
46  
47 650 about violence in resource poor settings. *Trials*. 2015 Nov;16:516.  
48  
49  
50  
51 651 55. Oduro AR, Aborigo RA, Amugsi D, Anto F, Anyorigiya T, Atuguba F, et al.  
52  
53 652 Understanding and retention of the informed consent process among parents in rural  
54  
55 653 northern Ghana. *BMC Med Ethics*. 2008;9:1–9.  
56  
57  
58  
59  
60

- 1  
2  
3 654 56. Krosin MT, Klitzman R, Levin B, Cheng J, Ranney ML. Problems in comprehension  
4  
5 655 of informed consent in rural and peri-urban Mali, West Africa. *Clin Trials*.  
6  
7 656 2006;3(3):306–13.  
8  
9  
10 657 57. Molyneux CS, Peshu N, Marsh K. Trust and informed consent: Insights from  
11  
12 658 community members on the Kenyan coast. *Soc Sci Med*. 2005;61(7):1463–73.  
13  
14  
15 659 58. Joseph PD, Craig JC, Tong A, Caldwell PHY. Researchers, Regulators, and  
16  
17 660 Sponsors Views on Pediatric Clinical Trials: A Multinational Study. *Pediatrics*  
18  
19 661 [Internet]. 2016;138(4):e20161171–e20161171. Available from:  
20  
21 662 <http://pediatrics.aappublications.org/cgi/doi/10.1542/peds.2016-1171>  
22  
23  
24  
25 663 59. Nakkash R, Makhoul J, Afifi R. Obtaining informed consent: observations from  
26  
27 664 community research with refugee and impoverished youth. *J Med Ethics*. 2009  
28  
29 665 Oct;35(10):638–43.  
30  
31  
32  
33 666 60. Initiative for Vaccine Research of the Department of Vaccines and Biologicals World  
34  
35 667 Health Organization. Ethical considerations arising from vaccine trials conducted in  
36  
37 668 paediatric populations with high disease burden in developing countries. In:  
38  
39 669 WHO/IRV ethics meeting November 26-28, 2002 Accra, Ghana [Internet]. 2002.  
40  
41 670 Available from: [www.who.int/vaccines-documents](http://www.who.int/vaccines-documents)  
42  
43  
44  
45  
46 671

1  
2  
3  
4  
5  
6  
7  
8  
9  
10  
11  
12  
13  
14  
15  
16  
17  
18  
19  
20  
21  
22  
23  
24  
25  
26  
27  
28  
29  
30  
31  
32  
33  
34  
35  
36  
37  
38  
39  
40  
41  
42  
43  
44  
45  
46  
47  
48  
49  
50  
51  
52  
53  
54  
55  
56  
57  
58  
59  
60

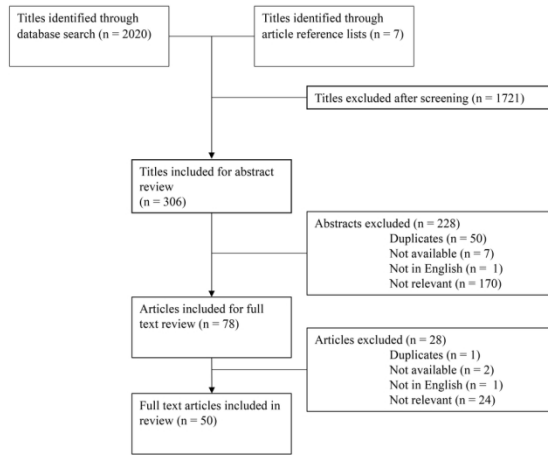

152x85mm (300 x 300 DPI)
